# Supplementary material for: Sequence-based prediction of vaccine targets for inducing T cell responses to SARS-CoV-2 utilizing the bioinformatics predictor RECON
Source: bioRxiv preprint, doi:10.1101/2020.04.06.027805, version 1 (2020-04-08)
Supplement: Supplementary Table 8 [file 027805_file07.csv]

Epitope.Sequence	MHC.Allele.Name	Assay.Type.Category	Assay.Result	Method	Measurement	Neon.Percent.Rank
AAAYFVGYLK	HLA-A03:01	MHC Binding	Positive-High	purified MHC/competitive/radioactivity	dissociation constant KD (~IC50)	2.5
AAAYFVGYLK	HLA-A11:01	MHC Binding	Positive-High	purified MHC/competitive/radioactivity	dissociation constant KD (~IC50)	0.17
AAAYFVGYLK	HLA-A31:01	MHC Binding	Positive-Intermediate	purified MHC/competitive/radioactivity	dissociation constant KD (~IC50)	5.5
AAAYFVGYLK	HLA-A68:01	MHC Binding	Positive-High	purified MHC/competitive/radioactivity	dissociation constant KD (~IC50)	1
AAYFVGYLK	HLA-A03:01	MHC Binding	Positive-High	purified MHC/competitive/radioactivity	dissociation constant KD (~IC50)	0.3
AAYFVGYLK	HLA-A11:01	MHC Binding	Positive-High	purified MHC/competitive/radioactivity	dissociation constant KD (~IC50)	0.05
AAYFVGYLK	HLA-A31:01	MHC Binding	Positive-Intermediate	purified MHC/competitive/radioactivity	dissociation constant KD (~IC50)	1.4
AAYFVGYLK	HLA-A68:01	MHC Binding	Positive-High	purified MHC/competitive/radioactivity	dissociation constant KD (~IC50)	0.4
ACADGTRHTY	HLA-A01:01	MHC Binding	Positive-Low	purified MHC/competitive/radioactivity	dissociation constant KD (~IC50)	6
ACADGTRHTY	HLA-A23:01	MHC Binding	Negative	purified MHC/competitive/radioactivity	dissociation constant KD (~IC50)	11
ACADGTRHTY	HLA-A24:02	MHC Binding	Negative	purified MHC/competitive/radioactivity	dissociation constant KD (~IC50)	13
ACADGTRHTY	HLA-A26:01	MHC Binding	Negative	purified MHC/competitive/radioactivity	dissociation constant KD (~IC50)	0.6
ACADGTRHTY	HLA-A29:02	MHC Binding	Negative	purified MHC/competitive/radioactivity	dissociation constant KD (~IC50)	0.9
ACADGTRHTY	HLA-A30:02	MHC Binding	Positive-High	purified MHC/competitive/radioactivity	dissociation constant KD (~IC50)	0.05
ADAGFMKQY	HLA-A01:01	MHC Binding	Negative	purified MHC/competitive/radioactivity	dissociation constant KD (~IC50)	7
ADAGFMKQY	HLA-A23:01	MHC Binding	Negative	purified MHC/competitive/radioactivity	dissociation constant KD (~IC50)	27
ADAGFMKQY	HLA-A24:02	MHC Binding	Negative	purified MHC/competitive/radioactivity	dissociation constant KD (~IC50)	28
ADAGFMKQY	HLA-A26:01	MHC Binding	Negative	purified MHC/competitive/radioactivity	dissociation constant KD (~IC50)	1.5
ADAGFMKQY	HLA-A29:02	MHC Binding	Negative	purified MHC/competitive/radioactivity	dissociation constant KD (~IC50)	3
ADAGFMKQY	HLA-A30:02	MHC Binding	Negative	purified MHC/competitive/radioactivity	dissociation constant KD (~IC50)	0.5
ADYSVLYNST	HLA-B18:01	MHC Binding	Negative	purified MHC/competitive/radioactivity	dissociation constant KD (~IC50)	60
ADYSVLYNST	HLA-B40:01	MHC Binding	Negative	purified MHC/competitive/radioactivity	dissociation constant KD (~IC50)	27
ADYSVLYNST	HLA-B40:02	MHC Binding	Negative	purified MHC/competitive/radioactivity	dissociation constant KD (~IC50)	21
ADYSVLYNST	HLA-B44:02	MHC Binding	Positive-Low	purified MHC/competitive/radioactivity	dissociation constant KD (~IC50)	12
ADYSVLYNST	HLA-B44:03	MHC Binding	Negative	purified MHC/competitive/radioactivity	dissociation constant KD (~IC50)	18
ADYSVLYNST	HLA-B45:01	MHC Binding	Positive-Low	purified MHC/competitive/radioactivity	dissociation constant KD (~IC50)	23
AEAAVKPLL	HLA-B18:01	MHC Binding	Negative	purified MHC/competitive/radioactivity	dissociation constant KD (~IC50)	2.5
AEAAVKPLL	HLA-B40:01	MHC Binding	Positive-High	purified MHC/competitive/radioactivity	dissociation constant KD (~IC50)	0.05
AEAAVKPLL	HLA-B40:02	MHC Binding	Negative	purified MHC/competitive/radioactivity	dissociation constant KD (~IC50)	0.15
AEAAVKPLL	HLA-B44:02	MHC Binding	Positive-Intermediate	purified MHC/competitive/radioactivity	dissociation constant KD (~IC50)	0.17
AEAAVKPLL	HLA-B44:03	MHC Binding	Positive-Intermediate	purified MHC/competitive/radioactivity	dissociation constant KD (~IC50)	0.07
AEAAVKPLL	HLA-B45:01	MHC Binding	Positive-Intermediate	purified MHC/competitive/radioactivity	dissociation constant KD (~IC50)	0.3
AEAAVKPLLA	HLA-B18:01	MHC Binding	Negative	purified MHC/competitive/radioactivity	dissociation constant KD (~IC50)	25
AEAAVKPLLA	HLA-B40:01	MHC Binding	Positive-Intermediate	purified MHC/competitive/radioactivity	dissociation constant KD (~IC50)	2
AEAAVKPLLA	HLA-B40:02	MHC Binding	Negative	purified MHC/competitive/radioactivity	dissociation constant KD (~IC50)	1.6
AEAAVKPLLA	HLA-B44:02	MHC Binding	Positive-Intermediate	purified MHC/competitive/radioactivity	dissociation constant KD (~IC50)	1
AEAAVKPLLA	HLA-B44:03	MHC Binding	Positive-High	purified MHC/competitive/radioactivity	dissociation constant KD (~IC50)	0.5
AEAAVKPLLA	HLA-B45:01	MHC Binding	Positive-High	purified MHC/competitive/radioactivity	dissociation constant KD (~IC50)	0.125
AEGSRGGSQA	HLA-B18:01	MHC Binding	Negative	purified MHC/competitive/radioactivity	dissociation constant KD (~IC50)	32
AEGSRGGSQA	HLA-B40:01	MHC Binding	Negative	purified MHC/competitive/radioactivity	dissociation constant KD (~IC50)	3.5
AEGSRGGSQA	HLA-B40:02	MHC Binding	Negative	purified MHC/competitive/radioactivity	dissociation constant KD (~IC50)	1.7
AEGSRGGSQA	HLA-B44:02	MHC Binding	Negative	purified MHC/competitive/radioactivity	dissociation constant KD (~IC50)	3
AEGSRGGSQA	HLA-B44:03	MHC Binding	Negative	purified MHC/competitive/radioactivity	dissociation constant KD (~IC50)	5.5
AEGSRGGSQA	HLA-B45:01	MHC Binding	Positive-Intermediate	purified MHC/competitive/radioactivity	dissociation constant KD (~IC50)	0.25
AEILIIIMRT	HLA-B18:01	MHC Binding	Negative	purified MHC/competitive/radioactivity	dissociation constant KD (~IC50)	1.1
AEILIIIMRT	HLA-B40:01	MHC Binding	Positive-Low	purified MHC/competitive/radioactivity	dissociation constant KD (~IC50)	1
AEILIIIMRT	HLA-B40:02	MHC Binding	Negative	purified MHC/competitive/radioactivity	dissociation constant KD (~IC50)	1
AEILIIIMRT	HLA-B44:02	MHC Binding	Positive-Low	purified MHC/competitive/radioactivity	dissociation constant KD (~IC50)	0.04
AEILIIIMRT	HLA-B44:03	MHC Binding	Positive-Intermediate	purified MHC/competitive/radioactivity	dissociation constant KD (~IC50)	0.04
AEILIIIMRT	HLA-B45:01	MHC Binding	Positive-Low	purified MHC/competitive/radioactivity	dissociation constant KD (~IC50)	1.4
AEIRASANLA	HLA-B18:01	MHC Binding	Negative	purified MHC/competitive/radioactivity	dissociation constant KD (~IC50)	12
AEIRASANLA	HLA-B40:01	MHC Binding	Positive-Intermediate	purified MHC/competitive/radioactivity	dissociation constant KD (~IC50)	1.3
AEIRASANLA	HLA-B40:02	MHC Binding	Positive-Low	purified MHC/competitive/radioactivity	dissociation constant KD (~IC50)	1.3
AEIRASANLA	HLA-B44:02	MHC Binding	Positive-Intermediate	purified MHC/competitive/radioactivity	dissociation constant KD (~IC50)	1
AEIRASANLA	HLA-B44:03	MHC Binding	Positive-Intermediate	purified MHC/competitive/radioactivity	dissociation constant KD (~IC50)	1.2
AEIRASANLA	HLA-B45:01	MHC Binding	Positive-High	purified MHC/competitive/radioactivity	dissociation constant KD (~IC50)	0.06
AEVQIDRLI	HLA-B18:01	MHC Binding	Negative	purified MHC/competitive/radioactivity	dissociation constant KD (~IC50)	3
AEVQIDRLI	HLA-B40:01	MHC Binding	Negative	purified MHC/competitive/radioactivity	dissociation constant KD (~IC50)	0.25
AEVQIDRLI	HLA-B40:02	MHC Binding	Positive-Intermediate	purified MHC/competitive/radioactivity	dissociation constant KD (~IC50)	0.2
AEVQIDRLI	HLA-B44:02	MHC Binding	Positive-Intermediate	purified MHC/competitive/radioactivity	dissociation constant KD (~IC50)	0.03
AEVQIDRLI	HLA-B44:03	MHC Binding	Positive-Intermediate	purified MHC/competitive/radioactivity	dissociation constant KD (~IC50)	0.04
AEVQIDRLI	HLA-B45:01	MHC Binding	Positive-Low	purified MHC/competitive/radioactivity	dissociation constant KD (~IC50)	0.6
AEVQIDRLIT	HLA-B18:01	MHC Binding	Negative	purified MHC/competitive/radioactivity	dissociation constant KD (~IC50)	7
AEVQIDRLIT	HLA-B40:01	MHC Binding	Positive-Low	purified MHC/competitive/radioactivity	dissociation constant KD (~IC50)	1.4
AEVQIDRLIT	HLA-B40:02	MHC Binding	Positive-Intermediate	purified MHC/competitive/radioactivity	dissociation constant KD (~IC50)	2.5
AEVQIDRLIT	HLA-B44:02	MHC Binding	Positive-Low	purified MHC/competitive/radioactivity	dissociation constant KD (~IC50)	0.8
AEVQIDRLIT	HLA-B44:03	MHC Binding	Positive-Intermediate	purified MHC/competitive/radioactivity	dissociation constant KD (~IC50)	0.4
AEVQIDRLIT	HLA-B45:01	MHC Binding	Positive-Intermediate	purified MHC/competitive/radioactivity	dissociation constant KD (~IC50)	1.3
AEVVKLPSRY	HLA-B18:01	MHC Binding	Positive-Low	purified MHC/competitive/radioactivity	dissociation constant KD (~IC50)	0.6
AEVVKLPSRY	HLA-B40:01	MHC Binding	Negative	purified MHC/competitive/radioactivity	dissociation constant KD (~IC50)	1.2
AEVVKLPSRY	HLA-B40:02	MHC Binding	Negative	purified MHC/competitive/radioactivity	dissociation constant KD (~IC50)	6
AEVVKLPSRY	HLA-B44:02	MHC Binding	Positive-Intermediate	purified MHC/competitive/radioactivity	dissociation constant KD (~IC50)	0.1
AEVVKLPSRY	HLA-B44:03	MHC Binding	Positive-Intermediate	purified MHC/competitive/radioactivity	dissociation constant KD (~IC50)	0.04
AEVVKLPSRY	HLA-B45:01	MHC Binding	Negative	purified MHC/competitive/radioactivity	dissociation constant KD (~IC50)	9
AFLLFLVLI	HLA-A01:01	MHC Binding	Positive-Low	purified MHC/competitive/radioactivity	dissociation constant KD (~IC50)	24
AFLLFLVLI	HLA-A23:01	MHC Binding	Positive-Low	purified MHC/competitive/radioactivity	dissociation constant KD (~IC50)	0.4
AFLLFLVLI	HLA-A24:02	MHC Binding	Negative	purified MHC/competitive/radioactivity	dissociation constant KD (~IC50)	0.4
AFLLFLVLI	HLA-A26:01	MHC Binding	Positive-Intermediate	purified MHC/competitive/radioactivity	dissociation constant KD (~IC50)	42
AFLLFLVLI	HLA-A29:02	MHC Binding	Positive-Low	purified MHC/competitive/radioactivity	dissociation constant KD (~IC50)	1.1
AFLLFLVLI	HLA-A30:02	MHC Binding	Negative	purified MHC/competitive/radioactivity	dissociation constant KD (~IC50)	10
AFNCTFEYI	HLA-A01:01	MHC Binding	Positive-Low	purified MHC/competitive/radioactivity	dissociation constant KD (~IC50)	29
AFNCTFEYI	HLA-A23:01	MHC Binding	Negative	purified MHC/competitive/radioactivity	dissociation constant KD (~IC50)	0.5
AFNCTFEYI	HLA-A24:02	MHC Binding	Negative	purified MHC/competitive/radioactivity	dissociation constant KD (~IC50)	0.8
AFNCTFEYI	HLA-A26:01	MHC Binding	Positive-Intermediate	purified MHC/competitive/radioactivity	dissociation constant KD (~IC50)	38
AFNCTFEYI	HLA-A29:02	MHC Binding	Positive-Intermediate	purified MHC/competitive/radioactivity	dissociation constant KD (~IC50)	8
AFNCTFEYI	HLA-A30:02	MHC Binding	Positive-Low	purified MHC/competitive/radioactivity	dissociation constant KD (~IC50)	19
AFQHQNSKK	HLA-A03:01	MHC Binding	Negative	purified MHC/competitive/radioactivity	dissociation constant KD (~IC50)	5.5
AFQHQNSKK	HLA-A11:01	MHC Binding	Positive-Low	purified MHC/competitive/radioactivity	dissociation constant KD (~IC50)	3
AFQHQNSKK	HLA-A31:01	MHC Binding	Positive-Low	purified MHC/competitive/radioactivity	dissociation constant KD (~IC50)	6
AFQHQNSKK	HLA-A68:01	MHC Binding	Positive-Low	purified MHC/competitive/radioactivity	dissociation constant KD (~IC50)	17
AFRDVLVVL	HLA-A01:01	MHC Binding	Negative	purified MHC/competitive/radioactivity	dissociation constant KD (~IC50)	24
AFRDVLVVL	HLA-A23:01	MHC Binding	Positive-Low	purified MHC/competitive/radioactivity	dissociation constant KD (~IC50)	0.25
AFRDVLVVL	HLA-A24:02	MHC Binding	Negative	purified MHC/competitive/radioactivity	dissociation constant KD (~IC50)	0.4
AFRDVLVVL	HLA-A26:01	MHC Binding	Negative	purified MHC/competitive/radioactivity	dissociation constant KD (~IC50)	7.5
AFRDVLVVL	HLA-A29:02	MHC Binding	Negative	purified MHC/competitive/radioactivity	dissociation constant KD (~IC50)	8
AFRDVLVVL	HLA-A30:02	MHC Binding	Negative	purified MHC/competitive/radioactivity	dissociation constant KD (~IC50)	4
AFSLDVSEK	HLA-A03:01	MHC Binding	Negative	purified MHC/competitive/radioactivity	dissociation constant KD (~IC50)	1.9
AFSLDVSEK	HLA-A11:01	MHC Binding	Positive-Low	purified MHC/competitive/radioactivity	dissociation constant KD (~IC50)	1.1
AFSLDVSEK	HLA-A31:01	MHC Binding	Negative	purified MHC/competitive/radioactivity	dissociation constant KD (~IC50)	3.5
AFSLDVSEK	HLA-A68:01	MHC Binding	Negative	purified MHC/competitive/radioactivity	dissociation constant KD (~IC50)	4.5
AIAACAMLLV	HLA-A02:01	MHC Binding	Positive-High	purified MHC/competitive/radioactivity	half maximal inhibitory concentration (IC50)	3.5
AIAACAMLLV	HLA-A02:03	MHC Binding	Positive-High	purified MHC/competitive/radioactivity	half maximal inhibitory concentration (IC50)	1.8
AIAACAMLLV	HLA-A68:02	MHC Binding	Positive-Low	purified MHC/competitive/radioactivity	half maximal inhibitory concentration (IC50)	8
AIILASFSA	HLA-A02:01	MHC Binding	Positive-Intermediate	purified MHC/competitive/radioactivity	half maximal inhibitory concentration (IC50)	5
AIILASFSA	HLA-A02:03	MHC Binding	Positive-Intermediate	purified MHC/competitive/radioactivity	half maximal inhibitory concentration (IC50)	6.5
AIILASFSA	HLA-A68:02	MHC Binding	Positive-Low	purified MHC/competitive/radioactivity	half maximal inhibitory concentration (IC50)	19
AIKCVDIVK	HLA-A01:01	MHC Binding	Negative	purified MHC/direct/fluorescence	qualitative binding	37
AIKCVDIVK	HLA-A02:01	MHC Binding	Negative	purified MHC/direct/fluorescence	qualitative binding	21
AIKCVDIVK	HLA-A03:01	MHC Binding	Positive-Low	purified MHC/direct/fluorescence	dissociation constant KD (~EC50)	1
AIKCVDIVK	HLA-A03:01	MHC Binding	Negative	purified MHC/direct/radioactivity	half life	1
AIKCVDIVK	HLA-A11:01	MHC Binding	Positive-Intermediate	purified MHC/direct/fluorescence	dissociation constant KD (~EC50)	0.6
AIKCVDIVK	HLA-A11:01	MHC Binding	Positive-Intermediate	purified MHC/direct/radioactivity	half life	0.6
AIKCVDIVK	HLA-B07:02	MHC Binding	Negative	purified MHC/direct/fluorescence	qualitative binding	25
AIKCVDIVK	HLA-B15:01	MHC Binding	Negative	purified MHC/direct/fluorescence	qualitative binding	4.5
AIKCVDIVK	HLA-B40:01	MHC Binding	Negative	purified MHC/direct/fluorescence	qualitative binding	28
AIKCVDIVK	HLA-B58:01	MHC Binding	Negative	purified MHC/direct/fluorescence	qualitative binding	28
AIMTRCLAV	HLA-A02:01	MHC Binding	Positive-High	purified MHC/competitive/radioactivity	half maximal inhibitory concentration (IC50)	1.9
AIMTRCLAV	HLA-A02:03	MHC Binding	Positive-High	purified MHC/competitive/radioactivity	half maximal inhibitory concentration (IC50)	0.5
AIMTRCLAV	HLA-A68:02	MHC Binding	Positive-Low	purified MHC/competitive/radioactivity	half maximal inhibitory concentration (IC50)	15
AITTSNCAK	HLA-A01:01	MHC Binding	Negative	purified MHC/direct/fluorescence	qualitative binding	32
AITTSNCAK	HLA-A02:01	MHC Binding	Negative	purified MHC/direct/fluorescence	qualitative binding	27
AITTSNCAK	HLA-A03:01	MHC Binding	Positive-Low	purified MHC/direct/radioactivity	half life	1
AITTSNCAK	HLA-A03:01	MHC Binding	Positive-Low	purified MHC/direct/fluorescence	dissociation constant KD (~EC50)	1
AITTSNCAK	HLA-A11:01	MHC Binding	Positive-Intermediate	purified MHC/direct/fluorescence	dissociation constant KD (~EC50)	0.4
AITTSNCAK	HLA-A11:01	MHC Binding	Positive-High	purified MHC/direct/radioactivity	half life	0.4
AITTSNCAK	HLA-B07:02	MHC Binding	Negative	purified MHC/direct/fluorescence	qualitative binding	28
AITTSNCAK	HLA-B15:01	MHC Binding	Negative	purified MHC/direct/fluorescence	qualitative binding	25
AITTSNCAK	HLA-B40:01	MHC Binding	Negative	purified MHC/direct/fluorescence	qualitative binding	24
AITTSNCAK	HLA-B58:01	MHC Binding	Negative	purified MHC/direct/fluorescence	qualitative binding	25
AIYVFCISL	HLA-A02:01	MHC Binding	Positive-Intermediate	purified MHC/competitive/radioactivity	half maximal inhibitory concentration (IC50)	1.7
AIYVFCISL	HLA-A02:03	MHC Binding	Positive-Intermediate	purified MHC/competitive/radioactivity	half maximal inhibitory concentration (IC50)	1.1
AIYVFCISL	HLA-A68:02	MHC Binding	Negative	cellular MHC/competitive/fluorescence	half maximal inhibitory concentration (IC50)	4.5
ALALLLLDR	HLA-A02:01	MHC Binding	Negative	purified MHC	qualitative binding	4
ALALLLLDR	HLA-A02:07	MHC Binding	Negative	purified MHC	qualitative binding	10
ALALLLLDR	HLA-A03:01	MHC Binding	Positive-Low	purified MHC/competitive/radioactivity	dissociation constant KD (~IC50)	0.4
ALALLLLDR	HLA-A11:01	MHC Binding	Negative	purified MHC/competitive/radioactivity	dissociation constant KD (~IC50)	0.5
ALALLLLDR	HLA-A31:01	MHC Binding	Negative	purified MHC/competitive/radioactivity	dissociation constant KD (~IC50)	0.6
ALALLLLDR	HLA-A68:01	MHC Binding	Negative	purified MHC/competitive/radioactivity	dissociation constant KD (~IC50)	1.1
ALALLLLDR	HLA-B40:01	MHC Binding	Negative	purified MHC	qualitative binding	23
ALALLLLDR	HLA-B46:01	MHC Binding	Negative	purified MHC	qualitative binding	31
ALALLLLDRL	HLA-A02:01	MHC Binding	Negative	purified MHC/direct/fluorescence	qualitative binding	1.3
ALALLLLDRL	HLA-A02:01	MHC Binding	Negative	purified MHC	qualitative binding	1.3
ALALLLLDRL	HLA-A02:07	MHC Binding	Negative	purified MHC	qualitative binding	3.5
ALALLLLDRL	HLA-B40:01	MHC Binding	Negative	purified MHC	qualitative binding	4.5
ALALLLLDRL	HLA-B46:01	MHC Binding	Negative	purified MHC	qualitative binding	55
ALALLLLDRLN	HLA-A02:01	MHC Binding	Negative	purified MHC	qualitative binding	28
ALALLLLDRLN	HLA-A02:07	MHC Binding	Negative	purified MHC	qualitative binding	65
ALALLLLDRLN	HLA-B40:01	MHC Binding	Negative	purified MHC	qualitative binding	65
ALALLLLDRLN	HLA-B46:01	MHC Binding	Negative	purified MHC	qualitative binding	90
ALCTLLHLHR	HLA-A03:01	MHC Binding	Positive-Intermediate	purified MHC/competitive/radioactivity	dissociation constant KD (~IC50)	3.5
ALCTLLHLHR	HLA-A11:01	MHC Binding	Positive-Intermediate	purified MHC/competitive/radioactivity	dissociation constant KD (~IC50)	1.8
ALCTLLHLHR	HLA-A31:01	MHC Binding	Positive-Intermediate	purified MHC/competitive/radioactivity	dissociation constant KD (~IC50)	1.4
ALCTLLHLHR	HLA-A68:01	MHC Binding	Positive-Low	purified MHC/competitive/radioactivity	dissociation constant KD (~IC50)	7
ALDGVLSTFV	HLA-A02:01	MHC Binding	Positive-High	purified MHC/competitive/radioactivity	half maximal inhibitory concentration (IC50)	0.12
ALDGVLSTFV	HLA-A02:03	MHC Binding	Positive-High	purified MHC/competitive/radioactivity	half maximal inhibitory concentration (IC50)	2.5
ALDGVLSTFV	HLA-A68:02	MHC Binding	Negative	cellular MHC/competitive/fluorescence	half maximal inhibitory concentration (IC50)	9
ALIARCWYL	HLA-A02:01	MHC Binding	Positive-High	purified MHC/competitive/radioactivity	half maximal inhibitory concentration (IC50)	0.25
ALIARCWYL	HLA-A02:01	MHC Binding	Positive-High	purified MHC/competitive/radioactivity	dissociation constant KD (~IC50)	0.25
ALIARCWYL	HLA-A02:03	MHC Binding	Positive-High	purified MHC/competitive/radioactivity	half maximal inhibitory concentration (IC50)	0.175
ALIARCWYL	HLA-A02:03	MHC Binding	Positive-High	purified MHC/competitive/radioactivity	dissociation constant KD (~IC50)	0.175
ALIARCWYL	HLA-A68:02	MHC Binding	Positive-Low	purified MHC/competitive/radioactivity	half maximal inhibitory concentration (IC50)	9
ALIARCWYL	HLA-A68:02	MHC Binding	Positive-Low	purified MHC/competitive/radioactivity	dissociation constant KD (~IC50)	9
ALIRATSTR	HLA-A03:01	MHC Binding	Positive-Intermediate	purified MHC/competitive/radioactivity	dissociation constant KD (~IC50)	1.2
ALIRATSTR	HLA-A11:01	MHC Binding	Positive-Low	purified MHC/competitive/radioactivity	dissociation constant KD (~IC50)	1.6
ALIRATSTR	HLA-A31:01	MHC Binding	Positive-Intermediate	purified MHC/competitive/radioactivity	dissociation constant KD (~IC50)	0.5
ALIRATSTR	HLA-A68:01	MHC Binding	Positive-Intermediate	purified MHC/competitive/radioactivity	dissociation constant KD (~IC50)	0.9
ALIYFLQCI	HLA-A02:01	MHC Binding	Positive-High	purified MHC/competitive/radioactivity	half maximal inhibitory concentration (IC50)	0.7
ALIYFLQCI	HLA-A02:01	MHC Binding	Positive-High	purified MHC/competitive/radioactivity	dissociation constant KD (~IC50)	0.7
ALIYFLQCI	HLA-A02:03	MHC Binding	Positive-High	purified MHC/competitive/radioactivity	half maximal inhibitory concentration (IC50)	0.15
ALIYFLQCI	HLA-A02:03	MHC Binding	Positive-High	purified MHC/competitive/radioactivity	dissociation constant KD (~IC50)	0.15
ALIYFLQCI	HLA-A68:02	MHC Binding	Positive-Intermediate	purified MHC/competitive/radioactivity	half maximal inhibitory concentration (IC50)	5.5
ALIYFLQCI	HLA-A68:02	MHC Binding	Positive-Intermediate	purified MHC/competitive/radioactivity	dissociation constant KD (~IC50)	5.5
ALLADKFPV	HLA-A02:01	MHC Binding	Positive-High	purified MHC/competitive/radioactivity	half maximal inhibitory concentration (IC50)	0.17
ALLADKFPV	HLA-A02:03	MHC Binding	Positive-Low	purified MHC/competitive/radioactivity	half maximal inhibitory concentration (IC50)	5.5
ALLADKFPV	HLA-A68:02	MHC Binding	Negative	cellular MHC/competitive/fluorescence	half maximal inhibitory concentration (IC50)	14
ALLFLMSFT	HLA-A02:01	MHC Binding	Positive-Intermediate	purified MHC/competitive/radioactivity	half maximal inhibitory concentration (IC50)	2.5
ALLFLMSFT	HLA-A02:03	MHC Binding	Positive-Low	purified MHC/competitive/radioactivity	half maximal inhibitory concentration (IC50)	6.5
ALLFLMSFT	HLA-A68:02	MHC Binding	Negative	cellular MHC/competitive/fluorescence	half maximal inhibitory concentration (IC50)	46
ALLFLMSFTI	HLA-A02:01	MHC Binding	Positive-High	purified MHC/competitive/radioactivity	half maximal inhibitory concentration (IC50)	1.4
ALLFLMSFTI	HLA-A02:03	MHC Binding	Positive-Intermediate	purified MHC/competitive/radioactivity	half maximal inhibitory concentration (IC50)	8.5
ALLFLMSFTI	HLA-A68:02	MHC Binding	Positive-Low	purified MHC/competitive/radioactivity	half maximal inhibitory concentration (IC50)	28
ALLLLDRLN	HLA-A02:01	MHC Binding	Negative	purified MHC	qualitative binding	5
ALLLLDRLN	HLA-A02:07	MHC Binding	Negative	purified MHC	qualitative binding	12
ALLLLDRLN	HLA-B40:01	MHC Binding	Negative	purified MHC	qualitative binding	24
ALLLLDRLN	HLA-B46:01	MHC Binding	Negative	purified MHC	qualitative binding	55
ALLLLDRLNQ	HLA-A02:01	MHC Binding	Negative	purified MHC	qualitative binding	7.5
ALLLLDRLNQ	HLA-A02:07	MHC Binding	Negative	purified MHC	qualitative binding	18
ALLLLDRLNQ	HLA-B40:01	MHC Binding	Negative	purified MHC	qualitative binding	38
ALLLLDRLNQ	HLA-B46:01	MHC Binding	Negative	purified MHC	qualitative binding	70
ALNTLVKQL	HLA-A02:01	MHC Binding	Positive	cellular MHC/direct/fluorescence	qualitative binding	0.3
ALNTLVKQL	HLA-A02:01	MHC Binding	Positive-Low	cellular MHC/direct/fluorescence	qualitative binding	0.3
ALNTLVKQL	HLA-A02:01	T Cell	Positive	ELISPOT	IFNg release	0.3
ALNTLVKQL	HLA-A02:01	T Cell	Positive	51 chromium	cytotoxicity	0.3
ALNTPKDHI	HLA-A02:01	T Cell	Positive	ELISPOT	IFNg release	2.5
ALNTPKDHI	HLA-A02:01	MHC Binding	Positive	cellular MHC/direct/fluorescence	qualitative binding	2.5
ALNTPKDHI	HLA-A02:01	MHC Binding	Positive-Low	cellular MHC/direct/fluorescence	qualitative binding	2.5
ALNTPKDHI	HLA-A02:01	T Cell	Positive-Low	ELISPOT	IFNg release	2.5
ALQEAYYRA	HLA-A02:01	MHC Binding	Positive-High	purified MHC/competitive/radioactivity	half maximal inhibitory concentration (IC50)	0.25
ALQEAYYRA	HLA-A02:03	MHC Binding	Positive-High	purified MHC/competitive/radioactivity	half maximal inhibitory concentration (IC50)	1.3
ALQEAYYRA	HLA-A68:02	MHC Binding	Positive-Low	purified MHC/competitive/radioactivity	half maximal inhibitory concentration (IC50)	33
ALRANSAVK	HLA-A01:01	MHC Binding	Negative	purified MHC/direct/fluorescence	qualitative binding	19
ALRANSAVK	HLA-A02:01	MHC Binding	Negative	purified MHC/direct/fluorescence	qualitative binding	10
ALRANSAVK	HLA-A03:01	MHC Binding	Positive-High	purified MHC/direct/radioactivity	half life	0.5
ALRANSAVK	HLA-A03:01	MHC Binding	Positive-High	purified MHC/competitive/radioactivity	dissociation constant KD (~IC50)	0.5
ALRANSAVK	HLA-A03:01	MHC Binding	Positive-Intermediate	purified MHC/direct/fluorescence	dissociation constant KD (~EC50)	0.5
ALRANSAVK	HLA-A11:01	MHC Binding	Positive-Low	purified MHC/competitive/radioactivity	dissociation constant KD (~IC50)	1.9
ALRANSAVK	HLA-A11:01	MHC Binding	Positive-Low	purified MHC/direct/fluorescence	dissociation constant KD (~EC50)	1.9
ALRANSAVK	HLA-A24:02	MHC Binding	Negative	purified MHC/direct/fluorescence	qualitative binding	31
ALRANSAVK	HLA-A26:01	MHC Binding	Negative	purified MHC/direct/fluorescence	qualitative binding	26
ALRANSAVK	HLA-A31:01	MHC Binding	Positive-Low	purified MHC/competitive/radioactivity	dissociation constant KD (~IC50)	5
ALRANSAVK	HLA-A31:01	MHC Binding	Positive-Intermediate	purified MHC/direct/fluorescence	dissociation constant KD (~EC50)	5
ALRANSAVK	HLA-A68:01	MHC Binding	Negative	purified MHC/competitive/radioactivity	dissociation constant KD (~IC50)	13
ALRANSAVK	HLA-B07:02	MHC Binding	Negative	purified MHC/direct/fluorescence	qualitative binding	8
ALRANSAVK	HLA-B08:01	MHC Binding	Negative	purified MHC/direct/fluorescence	qualitative binding	28
ALRANSAVK	HLA-B15:01	MHC Binding	Negative	purified MHC/direct/fluorescence	qualitative binding	4
ALRANSAVK	HLA-B27:05	MHC Binding	Negative	purified MHC/direct/fluorescence	qualitative binding	22
ALRANSAVK	HLA-B40:01	MHC Binding	Negative	purified MHC/direct/fluorescence	qualitative binding	40
ALRANSAVK	HLA-B58:01	MHC Binding	Negative	purified MHC/direct/fluorescence	qualitative binding	40
ALSGVFCGV	HLA-A02:01	MHC Binding	Positive-High	purified MHC/competitive/radioactivity	half maximal inhibitory concentration (IC50)	0.15
ALSGVFCGV	HLA-A02:03	MHC Binding	Positive-High	purified MHC/competitive/radioactivity	half maximal inhibitory concentration (IC50)	0.2
ALSGVFCGV	HLA-A68:02	MHC Binding	Negative	cellular MHC/competitive/fluorescence	half maximal inhibitory concentration (IC50)	1.5
ALVCYIVMPV	HLA-A02:01	MHC Binding	Positive-High	purified MHC/competitive/radioactivity	half maximal inhibitory concentration (IC50)	1.1
ALVCYIVMPV	HLA-A02:03	MHC Binding	Positive-High	purified MHC/competitive/radioactivity	half maximal inhibitory concentration (IC50)	1
ALVCYIVMPV	HLA-A68:02	MHC Binding	Positive-Intermediate	purified MHC/competitive/radioactivity	half maximal inhibitory concentration (IC50)	15
ALVFLILCFT	HLA-A02:01	MHC Binding	Positive-Intermediate	purified MHC/competitive/radioactivity	half maximal inhibitory concentration (IC50)	7
ALVFLILCFT	HLA-A02:01	MHC Binding	Positive-Intermediate	purified MHC/competitive/radioactivity	dissociation constant KD (~IC50)	7
ALVFLILCFT	HLA-A02:03	MHC Binding	Positive-Low	purified MHC/competitive/radioactivity	half maximal inhibitory concentration (IC50)	9
ALVFLILCFT	HLA-A02:03	MHC Binding	Positive-Low	purified MHC/competitive/radioactivity	dissociation constant KD (~IC50)	9
ALVFLILCFT	HLA-A68:02	MHC Binding	Negative	cellular MHC/competitive/fluorescence	half maximal inhibitory concentration (IC50)	28
ALVFLILCFT	HLA-A68:02	MHC Binding	Negative	purified MHC/competitive/radioactivity	dissociation constant KD (~IC50)	28
ALVLLILMTA	HLA-A02:01	MHC Binding	Positive-Intermediate	purified MHC/competitive/radioactivity	half maximal inhibitory concentration (IC50)	2
ALVLLILMTA	HLA-A02:03	MHC Binding	Positive-Intermediate	purified MHC/competitive/radioactivity	half maximal inhibitory concentration (IC50)	1
ALVLLILMTA	HLA-A68:02	MHC Binding	Negative	cellular MHC/competitive/fluorescence	half maximal inhibitory concentration (IC50)	31
ALVSGTATA	HLA-A02:01	MHC Binding	Positive-Intermediate	purified MHC/competitive/radioactivity	dissociation constant KD (~IC50)	0.4
ALVSGTATA	HLA-A02:01	MHC Binding	Positive-Intermediate	purified MHC/competitive/radioactivity	half maximal inhibitory concentration (IC50)	0.4
ALVSGTATA	HLA-A02:03	MHC Binding	Positive-High	purified MHC/competitive/radioactivity	dissociation constant KD (~IC50)	0.17
ALVSGTATA	HLA-A02:03	MHC Binding	Positive-High	purified MHC/competitive/radioactivity	half maximal inhibitory concentration (IC50)	0.17
ALVSGTATA	HLA-A68:02	MHC Binding	Negative	cellular MHC/competitive/fluorescence	half maximal inhibitory concentration (IC50)	11
ALVSGTATA	HLA-A68:02	MHC Binding	Negative	purified MHC/competitive/radioactivity	dissociation constant KD (~IC50)	11
ALWEIQQVV	HLA-A01:01	MHC Binding	Negative	purified MHC/direct/fluorescence	qualitative binding	7
ALWEIQQVV	HLA-A02:01	MHC Binding	Positive-Intermediate	purified MHC/direct/fluorescence	dissociation constant KD (~EC50)	0.02
ALWEIQQVV	HLA-A02:01	MHC Binding	Positive-High	purified MHC/competitive/radioactivity	half maximal inhibitory concentration (IC50)	0.02
ALWEIQQVV	HLA-A02:01	MHC Binding	Positive-High	purified MHC/direct/radioactivity	half life	0.02
ALWEIQQVV	HLA-A02:01	MHC Binding	Positive	purified MHC/direct/fluorescence	qualitative binding	0.02
ALWEIQQVV	HLA-A02:01	MHC Binding	Positive-High	purified MHC/competitive/radioactivity	dissociation constant KD (~IC50)	0.02
ALWEIQQVV	HLA-A02:03	MHC Binding	Positive-High	purified MHC/competitive/radioactivity	half maximal inhibitory concentration (IC50)	0.08
ALWEIQQVV	HLA-A02:03	MHC Binding	Positive-High	purified MHC/competitive/radioactivity	dissociation constant KD (~IC50)	0.08
ALWEIQQVV	HLA-A03:01	MHC Binding	Negative	purified MHC/direct/fluorescence	qualitative binding	3
ALWEIQQVV	HLA-A11:01	MHC Binding	Negative	purified MHC/direct/fluorescence	qualitative binding	8.5
ALWEIQQVV	HLA-A24:02	MHC Binding	Negative	purified MHC/direct/fluorescence	qualitative binding	8.5
ALWEIQQVV	HLA-A26:01	MHC Binding	Negative	purified MHC/direct/fluorescence	qualitative binding	8
ALWEIQQVV	HLA-A31:01	MHC Binding	Negative	purified MHC/direct/fluorescence	qualitative binding	4
ALWEIQQVV	HLA-A68:02	MHC Binding	Positive-Intermediate	purified MHC/competitive/radioactivity	dissociation constant KD (~IC50)	1.9
ALWEIQQVV	HLA-A68:02	MHC Binding	Positive-Intermediate	purified MHC/competitive/radioactivity	half maximal inhibitory concentration (IC50)	1.9
ALWEIQQVV	HLA-B07:02	MHC Binding	Negative	purified MHC/direct/fluorescence	qualitative binding	9
ALWEIQQVV	HLA-B08:01	MHC Binding	Negative	purified MHC/direct/fluorescence	qualitative binding	3.5
ALWEIQQVV	HLA-B15:01	MHC Binding	Negative	purified MHC/direct/fluorescence	qualitative binding	1.2
ALWEIQQVV	HLA-B15:01	MHC Binding	Positive-Low	purified MHC/direct/fluorescence	dissociation constant KD (~EC50)	1.2
ALWEIQQVV	HLA-B27:05	MHC Binding	Negative	purified MHC/direct/fluorescence	qualitative binding	7
ALWEIQQVV	HLA-B40:01	MHC Binding	Negative	purified MHC/direct/fluorescence	qualitative binding	5
ALWEIQQVV	HLA-B58:01	MHC Binding	Negative	purified MHC/direct/fluorescence	qualitative binding	14
ALYKGFQFI	HLA-A02:01	MHC Binding	Positive-High	purified MHC/competitive/radioactivity	dissociation constant KD (~IC50)	0.4
ALYKGFQFI	HLA-A02:01	MHC Binding	Positive-High	purified MHC/competitive/radioactivity	half maximal inhibitory concentration (IC50)	0.4
ALYKGFQFI	HLA-A02:03	MHC Binding	Positive-High	purified MHC/competitive/radioactivity	half maximal inhibitory concentration (IC50)	0.25
ALYKGFQFI	HLA-A02:03	MHC Binding	Positive-High	purified MHC/competitive/radioactivity	dissociation constant KD (~IC50)	0.25
ALYKGFQFI	HLA-A68:02	MHC Binding	Positive-Low	purified MHC/competitive/radioactivity	half maximal inhibitory concentration (IC50)	4.5
ALYKGFQFI	HLA-A68:02	MHC Binding	Positive-Low	purified MHC/competitive/radioactivity	dissociation constant KD (~IC50)	4.5
AMQTMLFTM	HLA-A02:01	MHC Binding	Positive-High	purified MHC/competitive/radioactivity	half maximal inhibitory concentration (IC50)	4.5
AMQTMLFTM	HLA-A02:03	MHC Binding	Positive-Intermediate	purified MHC/competitive/radioactivity	half maximal inhibitory concentration (IC50)	6
AMQTMLFTM	HLA-A68:02	MHC Binding	Positive-Intermediate	purified MHC/competitive/radioactivity	half maximal inhibitory concentration (IC50)	47
AMWLLLLSI	HLA-A02:01	MHC Binding	Positive-High	purified MHC/competitive/radioactivity	dissociation constant KD (~IC50)	1.8
AMWLLLLSI	HLA-A02:01	MHC Binding	Positive-High	purified MHC/competitive/radioactivity	half maximal inhibitory concentration (IC50)	1.8
AMWLLLLSI	HLA-A02:03	MHC Binding	Positive-Intermediate	purified MHC/competitive/radioactivity	half maximal inhibitory concentration (IC50)	0.5
AMWLLLLSI	HLA-A02:03	MHC Binding	Positive-Intermediate	purified MHC/competitive/radioactivity	dissociation constant KD (~IC50)	0.5
AMWLLLLSI	HLA-A68:02	MHC Binding	Negative	purified MHC/competitive/radioactivity	dissociation constant KD (~IC50)	21
AMWLLLLSI	HLA-A68:02	MHC Binding	Negative	cellular MHC/competitive/fluorescence	half maximal inhibitory concentration (IC50)	21
APAICHEGKA	HLA-B07:02	MHC Binding	Positive-Low	purified MHC/competitive/radioactivity	dissociation constant KD (~IC50)	5.5
APAICHEGKA	HLA-B35:01	MHC Binding	Negative	purified MHC/competitive/radioactivity	dissociation constant KD (~IC50)	34
APAICHEGKA	HLA-B51:01	MHC Binding	Negative	purified MHC/competitive/radioactivity	dissociation constant KD (~IC50)	38
APAICHEGKA	HLA-B53:01	MHC Binding	Negative	purified MHC/competitive/radioactivity	dissociation constant KD (~IC50)	38
APAICHEGKA	HLA-B54:01	MHC Binding	Positive-Low	purified MHC/competitive/radioactivity	dissociation constant KD (~IC50)	13
APATVCGPKL	HLA-B07:02	MHC Binding	Positive-High	purified MHC/competitive/radioactivity	dissociation constant KD (~IC50)	0.08
APATVCGPKL	HLA-B35:01	MHC Binding	Negative	purified MHC/competitive/radioactivity	dissociation constant KD (~IC50)	1.1
APATVCGPKL	HLA-B51:01	MHC Binding	Negative	purified MHC/competitive/radioactivity	dissociation constant KD (~IC50)	4.5
APATVCGPKL	HLA-B53:01	MHC Binding	Negative	purified MHC/competitive/radioactivity	dissociation constant KD (~IC50)	4.5
APATVCGPKL	HLA-B54:01	MHC Binding	Negative	purified MHC/competitive/radioactivity	dissociation constant KD (~IC50)	5.5
APHGVVFLHV	HLA-B07:02	MHC Binding	Positive-Intermediate	purified MHC/competitive/radioactivity	dissociation constant KD (~IC50)	0.7
APHGVVFLHV	HLA-B35:01	MHC Binding	Positive-Low	purified MHC/competitive/radioactivity	dissociation constant KD (~IC50)	5
APHGVVFLHV	HLA-B51:01	MHC Binding	Negative	purified MHC/competitive/radioactivity	dissociation constant KD (~IC50)	1.8
APHGVVFLHV	HLA-B53:01	MHC Binding	Positive-Low	purified MHC/competitive/radioactivity	dissociation constant KD (~IC50)	8
APHGVVFLHV	HLA-B54:01	MHC Binding	Positive-Intermediate	purified MHC/competitive/radioactivity	dissociation constant KD (~IC50)	0.2
APHHVVAVI	HLA-B07:02	MHC Binding	Positive-High	purified MHC/competitive/radioactivity	dissociation constant KD (~IC50)	0.4
APHHVVAVI	HLA-B35:01	MHC Binding	Positive-Low	purified MHC/competitive/radioactivity	dissociation constant KD (~IC50)	1.5
APHHVVAVI	HLA-B51:01	MHC Binding	Positive-Low	purified MHC/competitive/radioactivity	dissociation constant KD (~IC50)	0.12
APHHVVAVI	HLA-B53:01	MHC Binding	Positive-Intermediate	purified MHC/competitive/radioactivity	dissociation constant KD (~IC50)	0.4
APHHVVAVI	HLA-B54:01	MHC Binding	Positive-Intermediate	purified MHC/competitive/radioactivity	dissociation constant KD (~IC50)	0.8
APHLLLIVI	HLA-B07:02	MHC Binding	Positive-Low	purified MHC/competitive/radioactivity	dissociation constant KD (~IC50)	0.17
APHLLLIVI	HLA-B35:01	MHC Binding	Negative	purified MHC/competitive/radioactivity	dissociation constant KD (~IC50)	1
APHLLLIVI	HLA-B51:01	MHC Binding	Negative	purified MHC/competitive/radioactivity	dissociation constant KD (~IC50)	0.12
APHLLLIVI	HLA-B53:01	MHC Binding	Positive-Low	purified MHC/competitive/radioactivity	dissociation constant KD (~IC50)	4
APHLLLIVI	HLA-B54:01	MHC Binding	Negative	purified MHC/competitive/radioactivity	dissociation constant KD (~IC50)	0.125
APSASAFFGM	HLA-B07:02	MHC Binding	Positive-Intermediate	purified MHC/competitive/radioactivity	dissociation constant KD (~IC50)	0.7
APSASAFFGM	HLA-B35:01	MHC Binding	Positive-Low	purified MHC/competitive/radioactivity	dissociation constant KD (~IC50)	1.8
APSASAFFGM	HLA-B51:01	MHC Binding	Positive-Low	purified MHC/competitive/radioactivity	dissociation constant KD (~IC50)	23
APSASAFFGM	HLA-B53:01	MHC Binding	Positive-Low	purified MHC/competitive/radioactivity	dissociation constant KD (~IC50)	17
APSASAFFGM	HLA-B54:01	MHC Binding	Negative	purified MHC/competitive/radioactivity	dissociation constant KD (~IC50)	15
APYMVGDVI	HLA-B07:02	MHC Binding	Positive-Intermediate	purified MHC/direct/radioactivity	half life	0.25
APYMVGDVI	HLA-B07:02	MHC Binding	Positive-Intermediate	purified MHC/competitive/radioactivity	dissociation constant KD (~IC50)	0.25
APYMVGDVI	HLA-B35:01	MHC Binding	Negative	purified MHC/competitive/radioactivity	dissociation constant KD (~IC50)	3
APYMVGDVI	HLA-B35:01	MHC Binding	Positive-Low	purified MHC/direct/radioactivity	half life	3
APYMVGDVI	HLA-B51:01	MHC Binding	Positive-Intermediate	purified MHC/competitive/radioactivity	dissociation constant KD (~IC50)	0.17
APYMVGDVI	HLA-B53:01	MHC Binding	Positive-Low	purified MHC/competitive/radioactivity	dissociation constant KD (~IC50)	1.5
APYMVGDVI	HLA-B54:01	MHC Binding	Negative	purified MHC/competitive/radioactivity	dissociation constant KD (~IC50)	1.3
APYMVGDVI	HLA-C05:01	MHC Binding	Negative	purified MHC/direct/fluorescence	dissociation constant KD (~EC50)	29
AQALNTLVK	HLA-A03:01	MHC Binding	Positive-Intermediate	purified MHC/competitive/radioactivity	dissociation constant KD (~IC50)	0.4
AQALNTLVK	HLA-A11:01	MHC Binding	Positive-High	purified MHC/competitive/radioactivity	dissociation constant KD (~IC50)	0.25
AQALNTLVK	HLA-A31:01	MHC Binding	Positive-Low	purified MHC/competitive/radioactivity	dissociation constant KD (~IC50)	4.5
AQALNTLVK	HLA-A68:01	MHC Binding	Positive-Low	purified MHC/competitive/radioactivity	dissociation constant KD (~IC50)	5
AQFAPSASA	HLA-A02:01	MHC Binding	Positive-Intermediate	purified MHC/competitive/radioactivity	dissociation constant KD (~IC50)	5
AQFAPSASA	HLA-A02:01	MHC Binding	Positive-Intermediate	purified MHC/competitive/radioactivity	half maximal inhibitory concentration (IC50)	5
AQFAPSASA	HLA-A02:03	MHC Binding	Positive-Intermediate	purified MHC/competitive/radioactivity	dissociation constant KD (~IC50)	1.8
AQFAPSASA	HLA-A02:03	MHC Binding	Positive-Intermediate	purified MHC/competitive/radioactivity	half maximal inhibitory concentration (IC50)	1.8
AQFAPSASA	HLA-A68:02	MHC Binding	Negative	purified MHC/competitive/radioactivity	dissociation constant KD (~IC50)	14
AQFAPSASA	HLA-A68:02	MHC Binding	Negative	cellular MHC/competitive/fluorescence	half maximal inhibitory concentration (IC50)	14
AQFLYLYAL	HLA-A02:01	MHC Binding	Positive-High	purified MHC/competitive/radioactivity	half maximal inhibitory concentration (IC50)	3
AQFLYLYAL	HLA-A02:01	MHC Binding	Positive-High	purified MHC/competitive/radioactivity	dissociation constant KD (~IC50)	3
AQFLYLYAL	HLA-A02:03	MHC Binding	Positive-High	purified MHC/competitive/radioactivity	half maximal inhibitory concentration (IC50)	0.9
AQFLYLYAL	HLA-A02:03	MHC Binding	Positive-High	purified MHC/competitive/radioactivity	dissociation constant KD (~IC50)	0.9
AQFLYLYAL	HLA-A68:02	MHC Binding	Negative	purified MHC/competitive/radioactivity	dissociation constant KD (~IC50)	7
AQFLYLYAL	HLA-A68:02	MHC Binding	Negative	cellular MHC/competitive/fluorescence	half maximal inhibitory concentration (IC50)	7
AQMGTLLIA	HLA-A02:01	MHC Binding	Positive-High	purified MHC/competitive/radioactivity	dissociation constant KD (~IC50)	3.5
AQMGTLLIA	HLA-A02:03	MHC Binding	Positive-High	purified MHC/competitive/radioactivity	dissociation constant KD (~IC50)	1.5
AQMGTLLIA	HLA-A68:02	MHC Binding	Negative	purified MHC/competitive/radioactivity	dissociation constant KD (~IC50)	47
AQPLPQRQK	HLA-A03:01	MHC Binding	Negative	purified MHC/competitive/radioactivity	dissociation constant KD (~IC50)	1.1
AQPLPQRQK	HLA-A11:01	MHC Binding	Positive-Low	purified MHC/competitive/radioactivity	dissociation constant KD (~IC50)	0.5
AQPLPQRQK	HLA-A31:01	MHC Binding	Negative	purified MHC/competitive/radioactivity	dissociation constant KD (~IC50)	3
AQPLPQRQK	HLA-A68:01	MHC Binding	Positive-Low	purified MHC/competitive/radioactivity	dissociation constant KD (~IC50)	12
AQPLPQRQKK	HLA-A03:01	MHC Binding	Negative	purified MHC/competitive/radioactivity	dissociation constant KD (~IC50)	4.5
AQPLPQRQKK	HLA-A11:01	MHC Binding	Positive-Low	purified MHC/competitive/radioactivity	dissociation constant KD (~IC50)	3.5
AQPLPQRQKK	HLA-A31:01	MHC Binding	Negative	purified MHC/competitive/radioactivity	dissociation constant KD (~IC50)	9
AQPLPQRQKK	HLA-A68:01	MHC Binding	Negative	purified MHC/competitive/radioactivity	dissociation constant KD (~IC50)	33
ASAFFGMSR	HLA-A03:01	MHC Binding	Positive-Low	purified MHC/competitive/radioactivity	dissociation constant KD (~IC50)	3.5
ASAFFGMSR	HLA-A11:01	MHC Binding	Positive-Intermediate	purified MHC/competitive/radioactivity	dissociation constant KD (~IC50)	0.1
ASAFFGMSR	HLA-A31:01	MHC Binding	Positive-High	purified MHC/competitive/radioactivity	dissociation constant KD (~IC50)	0.17
ASAFFGMSR	HLA-A68:01	MHC Binding	Positive-Intermediate	purified MHC/competitive/radioactivity	dissociation constant KD (~IC50)	0.125
ASANLAATK	HLA-A03:01	MHC Binding	Positive-Intermediate	purified MHC/competitive/radioactivity	dissociation constant KD (~IC50)	1.5
ASANLAATK	HLA-A11:01	MHC Binding	Positive-High	purified MHC/competitive/radioactivity	dissociation constant KD (~IC50)	0.17
ASANLAATK	HLA-A31:01	MHC Binding	Positive-Low	purified MHC/competitive/radioactivity	dissociation constant KD (~IC50)	2.5
ASANLAATK	HLA-A68:01	MHC Binding	Positive-Intermediate	purified MHC/competitive/radioactivity	dissociation constant KD (~IC50)	0.3
ASLGPLRETY	HLA-A01:01	MHC Binding	Negative	purified MHC/competitive/radioactivity	dissociation constant KD (~IC50)	4
ASLGPLRETY	HLA-A23:01	MHC Binding	Negative	purified MHC/competitive/radioactivity	dissociation constant KD (~IC50)	24
ASLGPLRETY	HLA-A24:02	MHC Binding	Negative	purified MHC/competitive/radioactivity	dissociation constant KD (~IC50)	25
ASLGPLRETY	HLA-A26:01	MHC Binding	Negative	purified MHC/competitive/radioactivity	dissociation constant KD (~IC50)	13
ASLGPLRETY	HLA-A29:02	MHC Binding	Positive-Low	purified MHC/competitive/radioactivity	dissociation constant KD (~IC50)	1.1
ASLGPLRETY	HLA-A30:02	MHC Binding	Positive-Intermediate	purified MHC/competitive/radioactivity	dissociation constant KD (~IC50)	0.3
ASLPTTIAK	HLA-A01:01	MHC Binding	Negative	purified MHC/direct/fluorescence	qualitative binding	7
ASLPTTIAK	HLA-A02:01	MHC Binding	Negative	purified MHC/direct/fluorescence	qualitative binding	13
ASLPTTIAK	HLA-A03:01	MHC Binding	Positive-High	purified MHC/direct/radioactivity	half life	0.07
ASLPTTIAK	HLA-A03:01	MHC Binding	Positive-Intermediate	purified MHC/direct/fluorescence	dissociation constant KD (~EC50)	0.07
ASLPTTIAK	HLA-A03:01	MHC Binding	Positive-High	purified MHC/competitive/radioactivity	dissociation constant KD (~IC50)	0.07
ASLPTTIAK	HLA-A11:01	MHC Binding	Positive-High	purified MHC/competitive/radioactivity	dissociation constant KD (~IC50)	0.01
ASLPTTIAK	HLA-A11:01	MHC Binding	Positive-High	purified MHC/direct/fluorescence	dissociation constant KD (~EC50)	0.01
ASLPTTIAK	HLA-A11:01	MHC Binding	Positive-High	purified MHC/direct/radioactivity	half life	0.01
ASLPTTIAK	HLA-A31:01	MHC Binding	Positive-Intermediate	purified MHC/competitive/radioactivity	dissociation constant KD (~IC50)	1.2
ASLPTTIAK	HLA-A68:01	MHC Binding	Positive-Low	purified MHC/competitive/radioactivity	dissociation constant KD (~IC50)	1.7
ASLPTTIAK	HLA-B07:02	MHC Binding	Negative	purified MHC/direct/fluorescence	qualitative binding	13
ASLPTTIAK	HLA-B15:01	MHC Binding	Negative	purified MHC/direct/fluorescence	qualitative binding	6
ASLPTTIAK	HLA-B40:01	MHC Binding	Negative	purified MHC/direct/fluorescence	qualitative binding	13
ASLPTTIAK	HLA-B58:01	MHC Binding	Negative	purified MHC/direct/fluorescence	qualitative binding	2.5
ASLPYGANK	HLA-A03:01	MHC Binding	Positive-Intermediate	purified MHC/competitive/radioactivity	dissociation constant KD (~IC50)	0.25
ASLPYGANK	HLA-A11:01	MHC Binding	Positive-Intermediate	purified MHC/competitive/radioactivity	dissociation constant KD (~IC50)	0.03
ASLPYGANK	HLA-A31:01	MHC Binding	Positive-Low	purified MHC/competitive/radioactivity	dissociation constant KD (~IC50)	0.6
ASLPYGANK	HLA-A68:01	MHC Binding	Negative	purified MHC/competitive/radioactivity	dissociation constant KD (~IC50)	2
ASSEVAVLY	HLA-A01:01	MHC Binding	Positive-High	purified MHC/competitive/radioactivity	dissociation constant KD (~IC50)	0.08
ASSEVAVLY	HLA-A23:01	MHC Binding	Negative	purified MHC/competitive/radioactivity	dissociation constant KD (~IC50)	12
ASSEVAVLY	HLA-A24:02	MHC Binding	Negative	purified MHC/competitive/radioactivity	dissociation constant KD (~IC50)	8.5
ASSEVAVLY	HLA-A26:01	MHC Binding	Positive-Low	purified MHC/competitive/radioactivity	dissociation constant KD (~IC50)	4
ASSEVAVLY	HLA-A29:02	MHC Binding	Positive-High	purified MHC/competitive/radioactivity	dissociation constant KD (~IC50)	0.17
ASSEVAVLY	HLA-A30:02	MHC Binding	Positive-High	purified MHC/competitive/radioactivity	dissociation constant KD (~IC50)	0.07
ATAGWTFGA	HLA-A02:01	MHC Binding	Positive-Intermediate	purified MHC/competitive/radioactivity	dissociation constant KD (~IC50)	4.5
ATAGWTFGA	HLA-A02:01	MHC Binding	Positive-Intermediate	purified MHC/competitive/radioactivity	half maximal inhibitory concentration (IC50)	4.5
ATAGWTFGA	HLA-A02:03	MHC Binding	Positive-High	purified MHC/competitive/radioactivity	dissociation constant KD (~IC50)	3.5
ATAGWTFGA	HLA-A02:03	MHC Binding	Positive-High	purified MHC/competitive/radioactivity	half maximal inhibitory concentration (IC50)	3.5
ATAGWTFGA	HLA-A68:02	MHC Binding	Positive-High	purified MHC/competitive/radioactivity	half maximal inhibitory concentration (IC50)	3
ATAGWTFGA	HLA-A68:02	MHC Binding	Positive-High	purified MHC/competitive/radioactivity	dissociation constant KD (~IC50)	3
ATEGALNTPK	HLA-A03:01	MHC Binding	Positive-Intermediate	purified MHC/competitive/radioactivity	dissociation constant KD (~IC50)	1.4
ATEGALNTPK	HLA-A11:01	MHC Binding	Positive-High	purified MHC/competitive/radioactivity	dissociation constant KD (~IC50)	0.4
ATEGALNTPK	HLA-A31:01	MHC Binding	Positive-Low	purified MHC/competitive/radioactivity	dissociation constant KD (~IC50)	16
ATEGALNTPK	HLA-A68:01	MHC Binding	Positive-Intermediate	purified MHC/competitive/radioactivity	dissociation constant KD (~IC50)	8
ATFSVPMEK	HLA-A01:01	MHC Binding	Negative	purified MHC/direct/fluorescence	qualitative binding	5
ATFSVPMEK	HLA-A02:01	MHC Binding	Negative	purified MHC/direct/fluorescence	qualitative binding	8
ATFSVPMEK	HLA-A03:01	MHC Binding	Positive-Intermediate	purified MHC/direct/fluorescence	dissociation constant KD (~EC50)	0.02
ATFSVPMEK	HLA-A03:01	MHC Binding	Positive-High	purified MHC/competitive/radioactivity	dissociation constant KD (~IC50)	0.02
ATFSVPMEK	HLA-A03:01	MHC Binding	Positive-High	purified MHC/direct/radioactivity	half life	0.02
ATFSVPMEK	HLA-A11:01	MHC Binding	Positive-High	purified MHC/competitive/radioactivity	dissociation constant KD (~IC50)	0.01
ATFSVPMEK	HLA-A11:01	MHC Binding	Positive-High	purified MHC/direct/radioactivity	half life	0.01
ATFSVPMEK	HLA-A11:01	MHC Binding	Positive-High	purified MHC/direct/fluorescence	dissociation constant KD (~EC50)	0.01
ATFSVPMEK	HLA-A24:02	MHC Binding	Negative	purified MHC/direct/fluorescence	qualitative binding	18
ATFSVPMEK	HLA-A26:01	MHC Binding	Negative	purified MHC/direct/fluorescence	qualitative binding	8.5
ATFSVPMEK	HLA-A31:01	MHC Binding	Positive-High	purified MHC/competitive/radioactivity	dissociation constant KD (~IC50)	1.1
ATFSVPMEK	HLA-A31:01	MHC Binding	Positive-Intermediate	purified MHC/direct/fluorescence	dissociation constant KD (~EC50)	1.1
ATFSVPMEK	HLA-A68:01	MHC Binding	Positive-High	purified MHC/competitive/radioactivity	dissociation constant KD (~IC50)	0.2
ATFSVPMEK	HLA-B07:02	MHC Binding	Negative	purified MHC/direct/fluorescence	qualitative binding	17
ATFSVPMEK	HLA-B08:01	MHC Binding	Negative	purified MHC/direct/fluorescence	qualitative binding	36
ATFSVPMEK	HLA-B15:01	MHC Binding	Negative	purified MHC/direct/fluorescence	qualitative binding	11
ATFSVPMEK	HLA-B27:05	MHC Binding	Negative	purified MHC/direct/fluorescence	dissociation constant KD (~EC50)	2.5
ATFSVPMEK	HLA-B40:01	MHC Binding	Negative	purified MHC/direct/fluorescence	qualitative binding	18
ATFSVPMEK	HLA-B58:01	MHC Binding	Negative	purified MHC/direct/fluorescence	qualitative binding	2.5
ATKIIALNK	HLA-A03:01	MHC Binding	Positive-Low	purified MHC/competitive/radioactivity	dissociation constant KD (~IC50)	0.3
ATKIIALNK	HLA-A11:01	MHC Binding	Positive-Intermediate	purified MHC/competitive/radioactivity	dissociation constant KD (~IC50)	0.12
ATKIIALNK	HLA-A31:01	MHC Binding	Positive-Low	purified MHC/competitive/radioactivity	dissociation constant KD (~IC50)	0.7
ATKIIALNK	HLA-A68:01	MHC Binding	Negative	purified MHC/competitive/radioactivity	dissociation constant KD (~IC50)	1.9
ATNNVFRLK	HLA-A03:01	MHC Binding	Positive-High	purified MHC/direct/radioactivity	half life	0.09
ATNNVFRLK	HLA-A11:01	MHC Binding	Positive-High	purified MHC/direct/radioactivity	half life	0.01
ATSRTLSYY	HLA-A01:01	MHC Binding	Positive-High	purified MHC/competitive/radioactivity	dissociation constant KD (~IC50)	0.06
ATSRTLSYY	HLA-A03:01	MHC Binding	Positive-High	purified MHC/competitive/radioactivity	dissociation constant KD (~IC50)	0.5
ATSRTLSYY	HLA-A11:01	MHC Binding	Positive-High	purified MHC/competitive/radioactivity	dissociation constant KD (~IC50)	1
ATSRTLSYY	HLA-A23:01	MHC Binding	Negative	purified MHC/competitive/radioactivity	dissociation constant KD (~IC50)	20
ATSRTLSYY	HLA-A24:02	MHC Binding	Negative	purified MHC/competitive/radioactivity	dissociation constant KD (~IC50)	22
ATSRTLSYY	HLA-A26:01	MHC Binding	Positive-Low	purified MHC/competitive/radioactivity	dissociation constant KD (~IC50)	0.9
ATSRTLSYY	HLA-A29:02	MHC Binding	Positive-High	purified MHC/competitive/radioactivity	dissociation constant KD (~IC50)	0.6
ATSRTLSYY	HLA-A30:02	MHC Binding	Positive-High	purified MHC/competitive/radioactivity	dissociation constant KD (~IC50)	0.06
ATSRTLSYY	HLA-A31:01	MHC Binding	Positive-Low	purified MHC/competitive/radioactivity	dissociation constant KD (~IC50)	5
ATSRTLSYY	HLA-A68:01	MHC Binding	Positive-Low	purified MHC/competitive/radioactivity	dissociation constant KD (~IC50)	8
ATSRTLSYYK	HLA-A03:01	MHC Binding	Positive-High	purified MHC/competitive/radioactivity	dissociation constant KD (~IC50)	2.5
ATSRTLSYYK	HLA-A11:01	MHC Binding	Positive-High	purified MHC/competitive/radioactivity	dissociation constant KD (~IC50)	0.4
ATSRTLSYYK	HLA-A31:01	MHC Binding	Positive-High	purified MHC/competitive/radioactivity	dissociation constant KD (~IC50)	8.5
ATSRTLSYYK	HLA-A68:01	MHC Binding	Positive-High	purified MHC/competitive/radioactivity	dissociation constant KD (~IC50)	5
ATSTGNYNY	HLA-A01:01	MHC Binding	Positive-Intermediate	purified MHC/competitive/radioactivity	dissociation constant KD (~IC50)	0.25
ATSTGNYNY	HLA-A03:01	MHC Binding	Negative	purified MHC/competitive/radioactivity	dissociation constant KD (~IC50)	1.8
ATSTGNYNY	HLA-A11:01	MHC Binding	Positive-Intermediate	purified MHC/competitive/radioactivity	dissociation constant KD (~IC50)	0.17
ATSTGNYNY	HLA-A23:01	MHC Binding	Negative	purified MHC/competitive/radioactivity	dissociation constant KD (~IC50)	13
ATSTGNYNY	HLA-A24:02	MHC Binding	Negative	purified MHC/competitive/radioactivity	dissociation constant KD (~IC50)	16
ATSTGNYNY	HLA-A26:01	MHC Binding	Negative	purified MHC/competitive/radioactivity	dissociation constant KD (~IC50)	2.5
ATSTGNYNY	HLA-A29:02	MHC Binding	Positive-High	purified MHC/competitive/radioactivity	dissociation constant KD (~IC50)	0.5
ATSTGNYNY	HLA-A30:02	MHC Binding	Positive-High	purified MHC/competitive/radioactivity	dissociation constant KD (~IC50)	0.09
ATSTGNYNY	HLA-A31:01	MHC Binding	Negative	purified MHC/competitive/radioactivity	dissociation constant KD (~IC50)	3
ATSTGNYNY	HLA-A68:01	MHC Binding	Negative	purified MHC/competitive/radioactivity	dissociation constant KD (~IC50)	3.5
ATSTGNYNYK	HLA-A03:01	MHC Binding	Positive-High	purified MHC/competitive/radioactivity	dissociation constant KD (~IC50)	1
ATSTGNYNYK	HLA-A11:01	MHC Binding	Positive-High	purified MHC/competitive/radioactivity	dissociation constant KD (~IC50)	0.03
ATSTGNYNYK	HLA-A31:01	MHC Binding	Positive-Intermediate	purified MHC/competitive/radioactivity	dissociation constant KD (~IC50)	3.5
ATSTGNYNYK	HLA-A68:01	MHC Binding	Positive-High	purified MHC/competitive/radioactivity	dissociation constant KD (~IC50)	1.6
ATSTRHPSK	HLA-A03:01	MHC Binding	Positive-High	purified MHC/competitive/radioactivity	dissociation constant KD (~IC50)	0.9
ATSTRHPSK	HLA-A11:01	MHC Binding	Positive-High	purified MHC/competitive/radioactivity	dissociation constant KD (~IC50)	0.25
ATSTRHPSK	HLA-A31:01	MHC Binding	Positive-Low	purified MHC/competitive/radioactivity	dissociation constant KD (~IC50)	3.5
ATSTRHPSK	HLA-A68:01	MHC Binding	Positive-Intermediate	purified MHC/competitive/radioactivity	dissociation constant KD (~IC50)	3
ATVVIGTSK	HLA-A03:01	MHC Binding	Positive-Intermediate	purified MHC/direct/radioactivity	half life	0.4
ATVVIGTSK	HLA-A03:01	MHC Binding	Positive-Intermediate	purified MHC/direct/fluorescence	dissociation constant KD (~EC50)	0.4
ATVVIGTSK	HLA-A03:01	MHC Binding	Positive-Intermediate	purified MHC/competitive/radioactivity	dissociation constant KD (~IC50)	0.4
ATVVIGTSK	HLA-A11:01	MHC Binding	Positive-High	purified MHC/competitive/radioactivity	dissociation constant KD (~IC50)	0.07
ATVVIGTSK	HLA-A11:01	MHC Binding	Positive-High	purified MHC/direct/fluorescence	dissociation constant KD (~EC50)	0.07
ATVVIGTSK	HLA-A11:01	MHC Binding	Positive-High	purified MHC/direct/radioactivity	half life	0.07
ATVVIGTSK	HLA-A31:01	MHC Binding	Positive-Low	purified MHC/competitive/radioactivity	dissociation constant KD (~IC50)	1
ATVVIGTSK	HLA-A68:01	MHC Binding	Positive-Intermediate	purified MHC/competitive/radioactivity	dissociation constant KD (~IC50)	0.3
AVAVHDFFK	HLA-A03:01	MHC Binding	Positive-High	purified MHC/direct/radioactivity	half life	0.2
AVAVHDFFK	HLA-A03:01	MHC Binding	Positive-Low	purified MHC/direct/fluorescence	dissociation constant KD (~EC50)	0.2
AVAVHDFFK	HLA-A03:01	MHC Binding	Positive-High	purified MHC/competitive/radioactivity	dissociation constant KD (~IC50)	0.2
AVAVHDFFK	HLA-A11:01	MHC Binding	Positive-Intermediate	purified MHC/direct/fluorescence	dissociation constant KD (~EC50)	0.06
AVAVHDFFK	HLA-A11:01	MHC Binding	Positive-High	purified MHC/direct/radioactivity	half life	0.06
AVAVHDFFK	HLA-A11:01	MHC Binding	Positive-High	purified MHC/competitive/radioactivity	dissociation constant KD (~IC50)	0.06
AVAVHDFFK	HLA-A31:01	MHC Binding	Positive-High	purified MHC/competitive/radioactivity	dissociation constant KD (~IC50)	3.5
AVAVHDFFK	HLA-A68:01	MHC Binding	Positive-High	purified MHC/competitive/radioactivity	dissociation constant KD (~IC50)	1.2
AVDPAKAYK	HLA-A01:01	MHC Binding	Negative	purified MHC/direct/fluorescence	qualitative binding	0.6
AVDPAKAYK	HLA-A02:01	MHC Binding	Negative	purified MHC/direct/fluorescence	qualitative binding	8
AVDPAKAYK	HLA-A03:01	MHC Binding	Positive-High	purified MHC/competitive/radioactivity	dissociation constant KD (~IC50)	0.4
AVDPAKAYK	HLA-A03:01	MHC Binding	Positive-Low	purified MHC/direct/fluorescence	dissociation constant KD (~EC50)	0.4
AVDPAKAYK	HLA-A11:01	MHC Binding	Positive-High	purified MHC/direct/radioactivity	half life	0.3
AVDPAKAYK	HLA-A11:01	MHC Binding	Positive-Intermediate	purified MHC/direct/fluorescence	dissociation constant KD (~EC50)	0.3
AVDPAKAYK	HLA-A11:01	MHC Binding	Positive-High	purified MHC/competitive/radioactivity	dissociation constant KD (~IC50)	0.3
AVDPAKAYK	HLA-A24:02	MHC Binding	Negative	purified MHC/direct/fluorescence	qualitative binding	26
AVDPAKAYK	HLA-A26:01	MHC Binding	Negative	purified MHC/direct/fluorescence	qualitative binding	20
AVDPAKAYK	HLA-A31:01	MHC Binding	Positive-High	purified MHC/competitive/radioactivity	dissociation constant KD (~IC50)	3
AVDPAKAYK	HLA-A31:01	MHC Binding	Positive-Intermediate	purified MHC/direct/fluorescence	dissociation constant KD (~EC50)	3
AVDPAKAYK	HLA-A68:01	MHC Binding	Positive-Low	purified MHC/competitive/radioactivity	dissociation constant KD (~IC50)	2.5
AVDPAKAYK	HLA-B07:02	MHC Binding	Negative	purified MHC/direct/fluorescence	qualitative binding	13
AVDPAKAYK	HLA-B08:01	MHC Binding	Negative	purified MHC/direct/fluorescence	qualitative binding	39
AVDPAKAYK	HLA-B15:01	MHC Binding	Negative	purified MHC/direct/fluorescence	qualitative binding	23
AVDPAKAYK	HLA-B27:05	MHC Binding	Negative	purified MHC/direct/fluorescence	qualitative binding	10
AVDPAKAYK	HLA-B40:01	MHC Binding	Negative	purified MHC/direct/fluorescence	qualitative binding	15
AVDPAKAYK	HLA-B58:01	MHC Binding	Negative	purified MHC/direct/fluorescence	qualitative binding	6.5
AVIIRGHLR	HLA-A03:01	MHC Binding	Negative	purified MHC/competitive/radioactivity	dissociation constant KD (~IC50)	0.7
AVIIRGHLR	HLA-A11:01	MHC Binding	Positive-Low	purified MHC/competitive/radioactivity	dissociation constant KD (~IC50)	0.3
AVIIRGHLR	HLA-A31:01	MHC Binding	Positive-Intermediate	purified MHC/competitive/radioactivity	dissociation constant KD (~IC50)	0.05
AVIIRGHLR	HLA-A68:01	MHC Binding	Positive-Low	purified MHC/competitive/radioactivity	dissociation constant KD (~IC50)	0.4
AVLQSGFRK	HLA-A03:01	MHC Binding	Positive-High	purified MHC/direct/radioactivity	half life	0.05
AVLQSGFRK	HLA-A11:01	MHC Binding	Positive-High	purified MHC/direct/radioactivity	half life	0.02
AYFPREGVF	HLA-A01:01	MHC Binding	Negative	purified MHC/competitive/radioactivity	dissociation constant KD (~IC50)	20
AYFPREGVF	HLA-A23:01	MHC Binding	Positive-Low	purified MHC/competitive/radioactivity	dissociation constant KD (~IC50)	0.04
AYFPREGVF	HLA-A24:02	MHC Binding	Negative	purified MHC/competitive/radioactivity	dissociation constant KD (~IC50)	0.06
AYFPREGVF	HLA-A26:01	MHC Binding	Negative	purified MHC/competitive/radioactivity	dissociation constant KD (~IC50)	5
AYFPREGVF	HLA-A29:02	MHC Binding	Negative	purified MHC/competitive/radioactivity	dissociation constant KD (~IC50)	0.7
AYFPREGVF	HLA-A30:02	MHC Binding	Negative	purified MHC/competitive/radioactivity	dissociation constant KD (~IC50)	0.8
AYSNNTIAI	HLA-A01:01	MHC Binding	Negative	purified MHC/competitive/radioactivity	dissociation constant KD (~IC50)	33
AYSNNTIAI	HLA-A23:01	MHC Binding	Negative	purified MHC/competitive/radioactivity	dissociation constant KD (~IC50)	0.5
AYSNNTIAI	HLA-A24:02	MHC Binding	Negative	purified MHC/competitive/radioactivity	dissociation constant KD (~IC50)	0.175
AYSNNTIAI	HLA-A26:01	MHC Binding	Negative	purified MHC/competitive/radioactivity	dissociation constant KD (~IC50)	38
AYSNNTIAI	HLA-A29:02	MHC Binding	Positive-High	purified MHC/competitive/radioactivity	dissociation constant KD (~IC50)	5.5
AYSNNTIAI	HLA-A30:02	MHC Binding	Positive-Intermediate	purified MHC/competitive/radioactivity	dissociation constant KD (~IC50)	15
AYSNRNRFL	HLA-A01:01	MHC Binding	Negative	purified MHC/competitive/radioactivity	dissociation constant KD (~IC50)	22
AYSNRNRFL	HLA-A23:01	MHC Binding	Positive-Low	purified MHC/competitive/radioactivity	dissociation constant KD (~IC50)	0.4
AYSNRNRFL	HLA-A24:02	MHC Binding	Positive-Intermediate	purified MHC/competitive/radioactivity	dissociation constant KD (~IC50)	0.3
AYSNRNRFL	HLA-A26:01	MHC Binding	Negative	purified MHC/competitive/radioactivity	dissociation constant KD (~IC50)	37
AYSNRNRFL	HLA-A29:02	MHC Binding	Negative	purified MHC/competitive/radioactivity	dissociation constant KD (~IC50)	15
AYSNRNRFL	HLA-A30:02	MHC Binding	Negative	purified MHC/competitive/radioactivity	dissociation constant KD (~IC50)	4
CADGTRHTY	HLA-A01:01	MHC Binding	Positive-Intermediate	purified MHC/direct/fluorescence	dissociation constant KD (~EC50)	0.15
CADGTRHTY	HLA-A01:01	MHC Binding	Positive-Low	purified MHC/direct/radioactivity	half life	0.15
CADGTRHTY	HLA-A01:01	MHC Binding	Positive	purified MHC/direct/fluorescence	qualitative binding	0.15
CADGTRHTY	HLA-A01:01	MHC Binding	Positive-High	purified MHC/competitive/radioactivity	dissociation constant KD (~IC50)	0.15
CADGTRHTY	HLA-A02:01	MHC Binding	Negative	purified MHC/direct/fluorescence	qualitative binding	22
CADGTRHTY	HLA-A03:01	MHC Binding	Negative	purified MHC/direct/fluorescence	qualitative binding	31
CADGTRHTY	HLA-A03:01	MHC Binding	Negative	purified MHC/direct/fluorescence	dissociation constant KD (~EC50)	31
CADGTRHTY	HLA-A11:01	MHC Binding	Negative	purified MHC/direct/fluorescence	qualitative binding	16
CADGTRHTY	HLA-A23:01	MHC Binding	Negative	purified MHC/competitive/radioactivity	dissociation constant KD (~IC50)	26
CADGTRHTY	HLA-A24:02	MHC Binding	Negative	purified MHC/direct/fluorescence	qualitative binding	27
CADGTRHTY	HLA-A24:02	MHC Binding	Negative	purified MHC/competitive/radioactivity	dissociation constant KD (~IC50)	27
CADGTRHTY	HLA-A26:01	MHC Binding	Positive-Low	purified MHC/competitive/radioactivity	dissociation constant KD (~IC50)	5
CADGTRHTY	HLA-A26:01	MHC Binding	Negative	purified MHC/direct/fluorescence	qualitative binding	5
CADGTRHTY	HLA-A29:02	MHC Binding	Positive-Low	purified MHC/competitive/radioactivity	dissociation constant KD (~IC50)	1
CADGTRHTY	HLA-A30:02	MHC Binding	Positive-High	purified MHC/competitive/radioactivity	dissociation constant KD (~IC50)	0.1
CADGTRHTY	HLA-A31:01	MHC Binding	Negative	purified MHC/direct/fluorescence	qualitative binding	28
CADGTRHTY	HLA-B07:02	MHC Binding	Negative	purified MHC/direct/fluorescence	qualitative binding	20
CADGTRHTY	HLA-B08:01	MHC Binding	Negative	purified MHC/direct/fluorescence	qualitative binding	34
CADGTRHTY	HLA-B15:01	MHC Binding	Negative	purified MHC/direct/fluorescence	qualitative binding	2
CADGTRHTY	HLA-B15:01	MHC Binding	Positive-Low	purified MHC/direct/fluorescence	dissociation constant KD (~EC50)	2
CADGTRHTY	HLA-B27:05	MHC Binding	Negative	purified MHC/direct/fluorescence	qualitative binding	18
CADGTRHTY	HLA-B40:01	MHC Binding	Negative	purified MHC/direct/fluorescence	qualitative binding	20
CADGTRHTY	HLA-B58:01	MHC Binding	Negative	purified MHC/direct/fluorescence	qualitative binding	0.25
CADGTRHTY	HLA-B58:01	MHC Binding	Positive-Low	purified MHC/direct/fluorescence	dissociation constant KD (~EC50)	0.25
CELYHYQECV	HLA-B18:01	MHC Binding	Negative	purified MHC/competitive/radioactivity	dissociation constant KD (~IC50)	6.5
CELYHYQECV	HLA-B40:01	MHC Binding	Positive-Low	purified MHC/competitive/radioactivity	dissociation constant KD (~IC50)	3
CELYHYQECV	HLA-B40:02	MHC Binding	Negative	purified MHC/competitive/radioactivity	dissociation constant KD (~IC50)	5
CELYHYQECV	HLA-B44:02	MHC Binding	Negative	purified MHC/competitive/radioactivity	dissociation constant KD (~IC50)	17
CELYHYQECV	HLA-B44:03	MHC Binding	Positive-Low	purified MHC/competitive/radioactivity	dissociation constant KD (~IC50)	14
CELYHYQECV	HLA-B45:01	MHC Binding	Positive-Intermediate	purified MHC/competitive/radioactivity	dissociation constant KD (~IC50)	2
CKSKNPLLY	HLA-A01:01	MHC Binding	Negative	purified MHC/competitive/radioactivity	dissociation constant KD (~IC50)	1.5
CKSKNPLLY	HLA-A23:01	MHC Binding	Negative	purified MHC/competitive/radioactivity	dissociation constant KD (~IC50)	16
CKSKNPLLY	HLA-A24:02	MHC Binding	Negative	purified MHC/competitive/radioactivity	dissociation constant KD (~IC50)	15
CKSKNPLLY	HLA-A26:01	MHC Binding	Negative	purified MHC/competitive/radioactivity	dissociation constant KD (~IC50)	14
CKSKNPLLY	HLA-A29:02	MHC Binding	Positive-Intermediate	purified MHC/competitive/radioactivity	dissociation constant KD (~IC50)	0.7
CKSKNPLLY	HLA-A30:02	MHC Binding	Positive-Intermediate	purified MHC/competitive/radioactivity	dissociation constant KD (~IC50)	4
CLDAGINYV	HLA-A02:01	MHC Binding	Positive-High	purified MHC/competitive/radioactivity	dissociation constant KD (~IC50)	0.07
CLDAGINYV	HLA-A02:01	MHC Binding	Positive-High	purified MHC/competitive/radioactivity	half maximal inhibitory concentration (IC50)	0.07
CLDAGINYV	HLA-A02:03	MHC Binding	Positive-High	purified MHC/competitive/radioactivity	half maximal inhibitory concentration (IC50)	0.3
CLDAGINYV	HLA-A02:03	MHC Binding	Positive-High	purified MHC/competitive/radioactivity	dissociation constant KD (~IC50)	0.3
CLDAGINYV	HLA-A68:02	MHC Binding	Positive-Intermediate	purified MHC/competitive/radioactivity	half maximal inhibitory concentration (IC50)	4
CLDAGINYV	HLA-A68:02	MHC Binding	Positive-Intermediate	purified MHC/competitive/radioactivity	dissociation constant KD (~IC50)	4
CMTSCCSCLK	HLA-A03:01	MHC Binding	Positive-Intermediate	purified MHC/competitive/radioactivity	dissociation constant KD (~IC50)	18
CMTSCCSCLK	HLA-A11:01	MHC Binding	Positive-Intermediate	purified MHC/competitive/radioactivity	dissociation constant KD (~IC50)	14
CMTSCCSCLK	HLA-A31:01	MHC Binding	Positive-Low	purified MHC/competitive/radioactivity	dissociation constant KD (~IC50)	46
CMTSCCSCLK	HLA-A68:01	MHC Binding	Positive-High	purified MHC/competitive/radioactivity	dissociation constant KD (~IC50)	21
CTPPALNCY	HLA-A01:01	MHC Binding	Negative	purified MHC/competitive/radioactivity	dissociation constant KD (~IC50)	0.8
CTPPALNCY	HLA-A23:01	MHC Binding	Negative	purified MHC/competitive/radioactivity	dissociation constant KD (~IC50)	11
CTPPALNCY	HLA-A24:02	MHC Binding	Negative	purified MHC/competitive/radioactivity	dissociation constant KD (~IC50)	12
CTPPALNCY	HLA-A26:01	MHC Binding	Negative	purified MHC/competitive/radioactivity	dissociation constant KD (~IC50)	0.1
CTPPALNCY	HLA-A29:02	MHC Binding	Positive-Low	purified MHC/competitive/radioactivity	dissociation constant KD (~IC50)	1.3
CTPPALNCY	HLA-A30:02	MHC Binding	Positive-Low	purified MHC/competitive/radioactivity	dissociation constant KD (~IC50)	1.1
CVADYSVLY	HLA-A01:01	MHC Binding	Positive-High	purified MHC/competitive/radioactivity	dissociation constant KD (~IC50)	0.4
CVADYSVLY	HLA-A23:01	MHC Binding	Negative	purified MHC/competitive/radioactivity	dissociation constant KD (~IC50)	11
CVADYSVLY	HLA-A24:02	MHC Binding	Negative	purified MHC/competitive/radioactivity	dissociation constant KD (~IC50)	10
CVADYSVLY	HLA-A26:01	MHC Binding	Positive-High	purified MHC/competitive/radioactivity	dissociation constant KD (~IC50)	0.06
CVADYSVLY	HLA-A29:02	MHC Binding	Positive-High	purified MHC/competitive/radioactivity	dissociation constant KD (~IC50)	0.05
CVADYSVLY	HLA-A30:02	MHC Binding	Positive-High	purified MHC/competitive/radioactivity	dissociation constant KD (~IC50)	0.3
CVMYASALV	HLA-A02:01	MHC Binding	Positive-High	purified MHC/competitive/radioactivity	half maximal inhibitory concentration (IC50)	4.5
CVMYASALV	HLA-A02:03	MHC Binding	Positive-High	purified MHC/competitive/radioactivity	half maximal inhibitory concentration (IC50)	9
CVMYASALV	HLA-A68:02	MHC Binding	Positive-High	purified MHC/competitive/radioactivity	half maximal inhibitory concentration (IC50)	1
CYGVSATKL	HLA-A01:01	MHC Binding	Negative	purified MHC/competitive/radioactivity	dissociation constant KD (~IC50)	32
CYGVSATKL	HLA-A23:01	MHC Binding	Negative	purified MHC/competitive/radioactivity	dissociation constant KD (~IC50)	0.8
CYGVSATKL	HLA-A24:02	MHC Binding	Negative	purified MHC/competitive/radioactivity	dissociation constant KD (~IC50)	0.6
CYGVSATKL	HLA-A26:01	MHC Binding	Negative	purified MHC/competitive/radioactivity	dissociation constant KD (~IC50)	28
CYGVSATKL	HLA-A29:02	MHC Binding	Negative	purified MHC/competitive/radioactivity	dissociation constant KD (~IC50)	19
CYGVSATKL	HLA-A30:02	MHC Binding	Negative	purified MHC/competitive/radioactivity	dissociation constant KD (~IC50)	19
CYWPLNDYGF	HLA-A01:01	MHC Binding	Negative	purified MHC/competitive/radioactivity	dissociation constant KD (~IC50)	48
CYWPLNDYGF	HLA-A23:01	MHC Binding	Positive-High	purified MHC/competitive/radioactivity	dissociation constant KD (~IC50)	0.05
CYWPLNDYGF	HLA-A24:02	MHC Binding	Positive-High	purified MHC/competitive/radioactivity	dissociation constant KD (~IC50)	0.2
CYWPLNDYGF	HLA-A26:01	MHC Binding	Negative	purified MHC/competitive/radioactivity	dissociation constant KD (~IC50)	14
CYWPLNDYGF	HLA-A29:02	MHC Binding	Positive-High	purified MHC/competitive/radioactivity	dissociation constant KD (~IC50)	1.4
CYWPLNDYGF	HLA-A30:02	MHC Binding	Positive-Low	purified MHC/competitive/radioactivity	dissociation constant KD (~IC50)	8.5
DEDDSEPVL	HLA-B18:01	MHC Binding	Negative	purified MHC/competitive/radioactivity	dissociation constant KD (~IC50)	0.15
DEDDSEPVL	HLA-B40:01	MHC Binding	Positive-Intermediate	purified MHC/competitive/radioactivity	dissociation constant KD (~IC50)	0.1
DEDDSEPVL	HLA-B40:02	MHC Binding	Positive-Low	purified MHC/competitive/radioactivity	dissociation constant KD (~IC50)	0.3
DEDDSEPVL	HLA-B44:02	MHC Binding	Negative	purified MHC/competitive/radioactivity	dissociation constant KD (~IC50)	1
DEDDSEPVL	HLA-B44:03	MHC Binding	Negative	purified MHC/competitive/radioactivity	dissociation constant KD (~IC50)	0.4
DEDDSEPVL	HLA-B45:01	MHC Binding	Negative	purified MHC/competitive/radioactivity	dissociation constant KD (~IC50)	3.5
DEEPMELDY	HLA-A01:01	MHC Binding	Positive-Low	purified MHC/competitive/radioactivity	dissociation constant KD (~IC50)	0.7
DEEPMELDY	HLA-A23:01	MHC Binding	Negative	purified MHC/competitive/radioactivity	dissociation constant KD (~IC50)	32
DEEPMELDY	HLA-A24:02	MHC Binding	Negative	purified MHC/competitive/radioactivity	dissociation constant KD (~IC50)	49
DEEPMELDY	HLA-A26:01	MHC Binding	Negative	purified MHC/competitive/radioactivity	dissociation constant KD (~IC50)	5.5
DEEPMELDY	HLA-A29:02	MHC Binding	Positive-Low	purified MHC/competitive/radioactivity	dissociation constant KD (~IC50)	4
DEEPMELDY	HLA-A30:02	MHC Binding	Negative	purified MHC/competitive/radioactivity	dissociation constant KD (~IC50)	17
DLPSGFNTL	HLA-A02:01	MHC Binding	Positive-Low	cellular MHC/direct/fluorescence	qualitative binding	1.2
DLPSGFNTL	HLA-A02:01	T Cell	Negative	ELISPOT	IFNg release	1.2
DLPSGFNTL	HLA-A02:01	T Cell	Negative	51 chromium	cytotoxicity	1.2
DLPSGFNTLK	HLA-A03:01	MHC Binding	Positive-Low	purified MHC/competitive/radioactivity	dissociation constant KD (~IC50)	1.1
DLPSGFNTLK	HLA-A11:01	MHC Binding	Positive-Low	purified MHC/competitive/radioactivity	dissociation constant KD (~IC50)	4.5
DLPSGFNTLK	HLA-A31:01	MHC Binding	Negative	purified MHC/competitive/radioactivity	dissociation constant KD (~IC50)	24
DLPSGFNTLK	HLA-A68:01	MHC Binding	Positive-High	purified MHC/competitive/radioactivity	dissociation constant KD (~IC50)	2
DNAFNCTFEY	HLA-A01:01	MHC Binding	Positive-Low	purified MHC/competitive/radioactivity	dissociation constant KD (~IC50)	8
DNAFNCTFEY	HLA-A23:01	MHC Binding	Negative	purified MHC/competitive/radioactivity	dissociation constant KD (~IC50)	43
DNAFNCTFEY	HLA-A24:02	MHC Binding	Negative	purified MHC/competitive/radioactivity	dissociation constant KD (~IC50)	45
DNAFNCTFEY	HLA-A26:01	MHC Binding	Positive-Intermediate	purified MHC/competitive/radioactivity	dissociation constant KD (~IC50)	3
DNAFNCTFEY	HLA-A29:02	MHC Binding	Positive-High	purified MHC/competitive/radioactivity	dissociation constant KD (~IC50)	1.9
DNAFNCTFEY	HLA-A30:02	MHC Binding	Positive-Intermediate	purified MHC/competitive/radioactivity	dissociation constant KD (~IC50)	16
DPKVYPIIL	HLA-B07:02	MHC Binding	Negative	purified MHC/competitive/radioactivity	dissociation constant KD (~IC50)	0.4
DPKVYPIIL	HLA-B35:01	MHC Binding	Negative	purified MHC/competitive/radioactivity	dissociation constant KD (~IC50)	0.7
DPKVYPIIL	HLA-B51:01	MHC Binding	Negative	purified MHC/competitive/radioactivity	dissociation constant KD (~IC50)	0.17
DPKVYPIIL	HLA-B53:01	MHC Binding	Negative	purified MHC/competitive/radioactivity	dissociation constant KD (~IC50)	3
DPKVYPIIL	HLA-B54:01	MHC Binding	Negative	purified MHC/competitive/radioactivity	dissociation constant KD (~IC50)	3
DSFKEELDKY	HLA-A01:01	MHC Binding	Positive-Low	purified MHC/competitive/radioactivity	dissociation constant KD (~IC50)	1.5
DSFKEELDKY	HLA-A23:01	MHC Binding	Negative	purified MHC/competitive/radioactivity	dissociation constant KD (~IC50)	46
DSFKEELDKY	HLA-A24:02	MHC Binding	Negative	purified MHC/competitive/radioactivity	dissociation constant KD (~IC50)	47
DSFKEELDKY	HLA-A26:01	MHC Binding	Positive-Intermediate	purified MHC/competitive/radioactivity	dissociation constant KD (~IC50)	0.4
DSFKEELDKY	HLA-A29:02	MHC Binding	Positive-Intermediate	purified MHC/competitive/radioactivity	dissociation constant KD (~IC50)	6
DSFKEELDKY	HLA-A30:02	MHC Binding	Positive-Intermediate	purified MHC/competitive/radioactivity	dissociation constant KD (~IC50)	0.5
DYSVLYNSTF	HLA-A01:01	MHC Binding	Negative	purified MHC/competitive/radioactivity	dissociation constant KD (~IC50)	40
DYSVLYNSTF	HLA-A23:01	MHC Binding	Positive-Intermediate	purified MHC/competitive/radioactivity	dissociation constant KD (~IC50)	1.5
DYSVLYNSTF	HLA-A24:02	MHC Binding	Positive-High	purified MHC/competitive/radioactivity	dissociation constant KD (~IC50)	0.25
DYSVLYNSTF	HLA-A26:01	MHC Binding	Positive-Low	purified MHC/competitive/radioactivity	dissociation constant KD (~IC50)	12
DYSVLYNSTF	HLA-A29:02	MHC Binding	Positive-Low	purified MHC/competitive/radioactivity	dissociation constant KD (~IC50)	4
DYSVLYNSTF	HLA-A30:02	MHC Binding	Negative	purified MHC/competitive/radioactivity	dissociation constant KD (~IC50)	16
DYVVVHGYF	HLA-A01:01	MHC Binding	Positive-Low	purified MHC/competitive/radioactivity	dissociation constant KD (~IC50)	25
DYVVVHGYF	HLA-A23:01	MHC Binding	Positive-High	purified MHC/competitive/radioactivity	dissociation constant KD (~IC50)	0.09
DYVVVHGYF	HLA-A24:02	MHC Binding	Positive-High	purified MHC/competitive/radioactivity	dissociation constant KD (~IC50)	0.08
DYVVVHGYF	HLA-A26:01	MHC Binding	Positive-Low	purified MHC/competitive/radioactivity	dissociation constant KD (~IC50)	1.6
DYVVVHGYF	HLA-A29:02	MHC Binding	Positive-Intermediate	purified MHC/competitive/radioactivity	dissociation constant KD (~IC50)	1.2
DYVVVHGYF	HLA-A30:02	MHC Binding	Negative	purified MHC/competitive/radioactivity	dissociation constant KD (~IC50)	7
ECANLLLQY	HLA-A01:01	MHC Binding	Negative	purified MHC/competitive/radioactivity	dissociation constant KD (~IC50)	1.3
ECANLLLQY	HLA-A23:01	MHC Binding	Negative	purified MHC/competitive/radioactivity	dissociation constant KD (~IC50)	6.5
ECANLLLQY	HLA-A24:02	MHC Binding	Negative	purified MHC/competitive/radioactivity	dissociation constant KD (~IC50)	11
ECANLLLQY	HLA-A26:01	MHC Binding	Positive-Low	purified MHC/competitive/radioactivity	dissociation constant KD (~IC50)	0.1
ECANLLLQY	HLA-A29:02	MHC Binding	Positive-High	purified MHC/competitive/radioactivity	dissociation constant KD (~IC50)	0.6
ECANLLLQY	HLA-A30:02	MHC Binding	Positive-Low	purified MHC/competitive/radioactivity	dissociation constant KD (~IC50)	1.4
EELPDEFVV	HLA-B18:01	MHC Binding	Negative	purified MHC/competitive/radioactivity	dissociation constant KD (~IC50)	0.4
EELPDEFVV	HLA-B18:01	MHC Binding	Positive-Low	purified MHC/competitive/radioactivity	dissociation constant KD (~IC50)	0.4
EELPDEFVV	HLA-B40:01	MHC Binding	Negative	purified MHC/competitive/radioactivity	dissociation constant KD (~IC50)	0.6
EELPDEFVV	HLA-B40:01	MHC Binding	Positive-Low	purified MHC/competitive/radioactivity	dissociation constant KD (~IC50)	0.6
EELPDEFVV	HLA-B40:02	MHC Binding	Positive-Low	purified MHC/competitive/radioactivity	dissociation constant KD (~IC50)	0.25
EELPDEFVV	HLA-B40:02	MHC Binding	Negative	purified MHC/competitive/radioactivity	dissociation constant KD (~IC50)	0.25
EELPDEFVV	HLA-B44:02	MHC Binding	Negative	purified MHC/competitive/radioactivity	dissociation constant KD (~IC50)	0.4
EELPDEFVV	HLA-B44:03	MHC Binding	Negative	purified MHC/competitive/radioactivity	dissociation constant KD (~IC50)	0.6
EELPDEFVV	HLA-B44:03	MHC Binding	Positive-Low	purified MHC/competitive/radioactivity	dissociation constant KD (~IC50)	0.6
EELPDEFVV	HLA-B45:01	MHC Binding	Positive-Intermediate	purified MHC/competitive/radioactivity	dissociation constant KD (~IC50)	0.17
EELPDEFVV	HLA-B45:01	MHC Binding	Positive-High	purified MHC/competitive/radioactivity	dissociation constant KD (~IC50)	0.17
ELCDNPFFA	HLA-A02:01	MHC Binding	Positive	cellular MHC/direct/fluorescence	qualitative binding	0.7
ELSPRWYFY	HLA-A01:01	MHC Binding	Negative	purified MHC/competitive/radioactivity	dissociation constant KD (~IC50)	0.3
ELSPRWYFY	HLA-A23:01	MHC Binding	Negative	purified MHC/competitive/radioactivity	dissociation constant KD (~IC50)	8.5
ELSPRWYFY	HLA-A24:02	MHC Binding	Negative	purified MHC/competitive/radioactivity	dissociation constant KD (~IC50)	6
ELSPRWYFY	HLA-A26:01	MHC Binding	Positive-High	purified MHC/competitive/radioactivity	dissociation constant KD (~IC50)	0.7
ELSPRWYFY	HLA-A29:02	MHC Binding	Positive-Intermediate	purified MHC/competitive/radioactivity	dissociation constant KD (~IC50)	0.25
ELSPRWYFY	HLA-A30:02	MHC Binding	Positive-Low	purified MHC/competitive/radioactivity	dissociation constant KD (~IC50)	0.8
ELSPRWYFYY	HLA-A01:01	MHC Binding	Positive-Intermediate	purified MHC/competitive/radioactivity	dissociation constant KD (~IC50)	0.5
ELSPRWYFYY	HLA-A23:01	MHC Binding	Negative	purified MHC/competitive/radioactivity	dissociation constant KD (~IC50)	15
ELSPRWYFYY	HLA-A24:02	MHC Binding	Negative	purified MHC/competitive/radioactivity	dissociation constant KD (~IC50)	9
ELSPRWYFYY	HLA-A26:01	MHC Binding	Positive-High	purified MHC/competitive/radioactivity	dissociation constant KD (~IC50)	0.09
ELSPRWYFYY	HLA-A29:02	MHC Binding	Positive-High	purified MHC/competitive/radioactivity	dissociation constant KD (~IC50)	0.3
ELSPRWYFYY	HLA-A30:02	MHC Binding	Positive-Intermediate	purified MHC/competitive/radioactivity	dissociation constant KD (~IC50)	1.2
ELYSPLFLI	HLA-A02:01	MHC Binding	Positive-High	purified MHC/competitive/radioactivity	half maximal inhibitory concentration (IC50)	0.9
ELYSPLFLI	HLA-A02:01	MHC Binding	Positive-High	purified MHC/competitive/radioactivity	dissociation constant KD (~IC50)	0.9
ELYSPLFLI	HLA-A02:03	MHC Binding	Positive-High	purified MHC/competitive/radioactivity	dissociation constant KD (~IC50)	1.6
ELYSPLFLI	HLA-A02:03	MHC Binding	Positive-High	purified MHC/competitive/radioactivity	half maximal inhibitory concentration (IC50)	1.6
ELYSPLFLI	HLA-A68:02	MHC Binding	Positive-High	purified MHC/competitive/radioactivity	half maximal inhibitory concentration (IC50)	0.25
ELYSPLFLI	HLA-A68:02	MHC Binding	Positive-High	purified MHC/competitive/radioactivity	dissociation constant KD (~IC50)	0.25
ETALALLLL	HLA-A02:01	MHC Binding	Negative	purified MHC	qualitative binding	12
ETALALLLL	HLA-A02:07	MHC Binding	Negative	purified MHC	qualitative binding	18
ETALALLLL	HLA-B40:01	MHC Binding	Negative	purified MHC	qualitative binding	8
ETALALLLL	HLA-B46:01	MHC Binding	Negative	purified MHC	qualitative binding	55
ETALALLLLD	HLA-A02:01	MHC Binding	Negative	purified MHC	qualitative binding	65
ETALALLLLD	HLA-A02:07	MHC Binding	Negative	purified MHC	qualitative binding	80
ETALALLLLD	HLA-B40:01	MHC Binding	Negative	purified MHC	qualitative binding	65
ETALALLLLD	HLA-B46:01	MHC Binding	Negative	purified MHC	qualitative binding	90
ETALALLLLDR	HLA-A02:01	MHC Binding	Negative	purified MHC	qualitative binding	90
ETALALLLLDR	HLA-A02:07	MHC Binding	Negative	purified MHC	qualitative binding	95
ETALALLLLDR	HLA-B40:01	MHC Binding	Negative	purified MHC	qualitative binding	90
ETALALLLLDR	HLA-B46:01	MHC Binding	Negative	purified MHC	qualitative binding	100
EVMPVSMAK	HLA-A01:01	MHC Binding	Negative	purified MHC/direct/fluorescence	qualitative binding	11
EVMPVSMAK	HLA-A02:01	MHC Binding	Negative	purified MHC/direct/fluorescence	qualitative binding	19
EVMPVSMAK	HLA-A03:01	MHC Binding	Positive-Intermediate	purified MHC/direct/fluorescence	dissociation constant KD (~EC50)	0.4
EVMPVSMAK	HLA-A03:01	MHC Binding	Positive-Intermediate	purified MHC/competitive/radioactivity	dissociation constant KD (~IC50)	0.4
EVMPVSMAK	HLA-A03:01	MHC Binding	Positive-Low	purified MHC/direct/radioactivity	half life	0.4
EVMPVSMAK	HLA-A11:01	MHC Binding	Positive-High	purified MHC/direct/radioactivity	half life	0.4
EVMPVSMAK	HLA-A11:01	MHC Binding	Positive-High	purified MHC/competitive/radioactivity	dissociation constant KD (~IC50)	0.4
EVMPVSMAK	HLA-A11:01	MHC Binding	Positive-High	purified MHC/direct/fluorescence	dissociation constant KD (~EC50)	0.4
EVMPVSMAK	HLA-A24:02	MHC Binding	Negative	purified MHC/direct/fluorescence	qualitative binding	18
EVMPVSMAK	HLA-A26:01	MHC Binding	Negative	purified MHC/direct/fluorescence	qualitative binding	0.7
EVMPVSMAK	HLA-A31:01	MHC Binding	Negative	purified MHC/competitive/radioactivity	dissociation constant KD (~IC50)	7.5
EVMPVSMAK	HLA-A31:01	MHC Binding	Negative	purified MHC/direct/fluorescence	qualitative binding	7.5
EVMPVSMAK	HLA-A68:01	MHC Binding	Positive-High	purified MHC/competitive/radioactivity	dissociation constant KD (~IC50)	0.12
EVMPVSMAK	HLA-B07:02	MHC Binding	Positive-Low	purified MHC/direct/fluorescence	dissociation constant KD (~EC50)	16
EVMPVSMAK	HLA-B07:02	MHC Binding	Negative	purified MHC/direct/fluorescence	qualitative binding	16
EVMPVSMAK	HLA-B08:01	MHC Binding	Negative	purified MHC/direct/fluorescence	qualitative binding	15
EVMPVSMAK	HLA-B15:01	MHC Binding	Negative	purified MHC/direct/fluorescence	qualitative binding	12
EVMPVSMAK	HLA-B27:05	MHC Binding	Negative	purified MHC/direct/fluorescence	qualitative binding	15
EVMPVSMAK	HLA-B40:01	MHC Binding	Negative	purified MHC/direct/fluorescence	qualitative binding	70
EVMPVSMAK	HLA-B58:01	MHC Binding	Negative	purified MHC/direct/fluorescence	qualitative binding	17
EVMPVSMAK	HLA-C04:01	MHC Binding	Positive-Low	purified MHC/competitive/fluorescence	dissociation constant KD	38
EVTPSGTWL	HLA-B40:01	MHC Binding	Negative	purified MHC	qualitative binding	7.5
EVTPSGTWLT	HLA-B40:01	MHC Binding	Negative	purified MHC	qualitative binding	55
EVTPSGTWLTY	HLA-B40:01	MHC Binding	Negative	purified MHC	qualitative binding	70
EYISDAFSL	HLA-A01:01	MHC Binding	Negative	purified MHC/competitive/radioactivity	dissociation constant KD (~IC50)	24
EYISDAFSL	HLA-A23:01	MHC Binding	Negative	purified MHC/competitive/radioactivity	dissociation constant KD (~IC50)	0.02
EYISDAFSL	HLA-A24:02	MHC Binding	Negative	purified MHC/competitive/radioactivity	dissociation constant KD (~IC50)	0.04
EYISDAFSL	HLA-A26:01	MHC Binding	Negative	purified MHC/competitive/radioactivity	dissociation constant KD (~IC50)	0.9
EYISDAFSL	HLA-A29:02	MHC Binding	Negative	purified MHC/competitive/radioactivity	dissociation constant KD (~IC50)	6
EYISDAFSL	HLA-A30:02	MHC Binding	Negative	purified MHC/competitive/radioactivity	dissociation constant KD (~IC50)	8
FADINGKLY	HLA-A01:01	MHC Binding	Positive-High	purified MHC/competitive/radioactivity	dissociation constant KD (~IC50)	0.02
FADINGKLY	HLA-A01:01	MHC Binding	Positive-Intermediate	purified MHC/direct/fluorescence	dissociation constant KD (~EC50)	0.02
FADINGKLY	HLA-A01:01	MHC Binding	Positive	purified MHC/direct/fluorescence	qualitative binding	0.02
FADINGKLY	HLA-A01:01	MHC Binding	Positive-Intermediate	purified MHC/direct/radioactivity	half life	0.02
FADINGKLY	HLA-A02:01	MHC Binding	Negative	purified MHC/direct/fluorescence	qualitative binding	21
FADINGKLY	HLA-A03:01	MHC Binding	Negative	purified MHC/direct/fluorescence	qualitative binding	20
FADINGKLY	HLA-A11:01	MHC Binding	Negative	purified MHC/direct/fluorescence	qualitative binding	23
FADINGKLY	HLA-A23:01	MHC Binding	Negative	purified MHC/competitive/radioactivity	dissociation constant KD (~IC50)	43
FADINGKLY	HLA-A24:02	MHC Binding	Negative	purified MHC/competitive/radioactivity	dissociation constant KD (~IC50)	24
FADINGKLY	HLA-A24:02	MHC Binding	Negative	purified MHC/direct/fluorescence	qualitative binding	24
FADINGKLY	HLA-A26:01	MHC Binding	Positive-Low	purified MHC/direct/fluorescence	dissociation constant KD (~EC50)	6.5
FADINGKLY	HLA-A26:01	MHC Binding	Positive-Low	purified MHC/competitive/radioactivity	dissociation constant KD (~IC50)	6.5
FADINGKLY	HLA-A29:02	MHC Binding	Positive-High	purified MHC/competitive/radioactivity	dissociation constant KD (~IC50)	0.5
FADINGKLY	HLA-A30:02	MHC Binding	Positive-Low	purified MHC/competitive/radioactivity	dissociation constant KD (~IC50)	0.9
FADINGKLY	HLA-A31:01	MHC Binding	Negative	purified MHC/direct/fluorescence	qualitative binding	38
FADINGKLY	HLA-B07:02	MHC Binding	Negative	purified MHC/direct/fluorescence	qualitative binding	26
FADINGKLY	HLA-B08:01	MHC Binding	Negative	purified MHC/direct/fluorescence	qualitative binding	20
FADINGKLY	HLA-B15:01	MHC Binding	Negative	purified MHC/direct/fluorescence	qualitative binding	3.5
FADINGKLY	HLA-B15:01	MHC Binding	Positive-Low	purified MHC/direct/fluorescence	dissociation constant KD (~EC50)	3.5
FADINGKLY	HLA-B27:05	MHC Binding	Negative	purified MHC/direct/fluorescence	qualitative binding	13
FADINGKLY	HLA-B40:01	MHC Binding	Negative	purified MHC/direct/fluorescence	dissociation constant KD (~EC50)	30
FADINGKLY	HLA-B40:01	MHC Binding	Negative	purified MHC/direct/fluorescence	qualitative binding	30
FADINGKLY	HLA-B58:01	MHC Binding	Negative	purified MHC/direct/fluorescence	qualitative binding	5
FADINGKLY	HLA-B58:01	MHC Binding	Positive-Low	purified MHC/direct/fluorescence	dissociation constant KD (~EC50)	5
FADINGKLY	HLA-C04:01	MHC Binding	Negative	purified MHC/direct/fluorescence	dissociation constant KD (~EC50)	1.5
FADINGKLY	HLA-C08:02	MHC Binding	Positive-High	purified MHC/direct/fluorescence	dissociation constant KD (~EC50)	0.12
FDDVQAPNY	HLA-A01:01	MHC Binding	Negative	purified MHC/competitive/radioactivity	dissociation constant KD (~IC50)	0.3
FDDVQAPNY	HLA-A23:01	MHC Binding	Negative	purified MHC/competitive/radioactivity	dissociation constant KD (~IC50)	60
FDDVQAPNY	HLA-A24:02	MHC Binding	Negative	purified MHC/competitive/radioactivity	dissociation constant KD (~IC50)	31
FDDVQAPNY	HLA-A26:01	MHC Binding	Negative	purified MHC/competitive/radioactivity	dissociation constant KD (~IC50)	34
FDDVQAPNY	HLA-A29:02	MHC Binding	Positive-Low	purified MHC/competitive/radioactivity	dissociation constant KD (~IC50)	1.3
FDDVQAPNY	HLA-A30:02	MHC Binding	Positive-Low	purified MHC/competitive/radioactivity	dissociation constant KD (~IC50)	6.5
FEIDKGIYQT	HLA-B18:01	MHC Binding	Negative	purified MHC/competitive/radioactivity	dissociation constant KD (~IC50)	2.5
FEIDKGIYQT	HLA-B40:01	MHC Binding	Positive-Low	purified MHC/competitive/radioactivity	dissociation constant KD (~IC50)	1.2
FEIDKGIYQT	HLA-B40:02	MHC Binding	Positive-High	purified MHC/competitive/radioactivity	dissociation constant KD (~IC50)	0.25
FEIDKGIYQT	HLA-B44:02	MHC Binding	Negative	purified MHC/competitive/radioactivity	dissociation constant KD (~IC50)	1.8
FEIDKGIYQT	HLA-B44:03	MHC Binding	Negative	purified MHC/competitive/radioactivity	dissociation constant KD (~IC50)	2.5
FEIDKGIYQT	HLA-B45:01	MHC Binding	Positive-Low	purified MHC/competitive/radioactivity	dissociation constant KD (~IC50)	1.1
FELCDNPFF	HLA-B18:01	MHC Binding	Positive-Intermediate	purified MHC/competitive/radioactivity	dissociation constant KD (~IC50)	0.9
FELCDNPFF	HLA-B40:01	MHC Binding	Positive-High	purified MHC/competitive/radioactivity	dissociation constant KD (~IC50)	0.7
FELCDNPFF	HLA-B40:02	MHC Binding	Positive-Intermediate	purified MHC/competitive/radioactivity	dissociation constant KD (~IC50)	3.5
FELCDNPFF	HLA-B44:02	MHC Binding	Positive-High	purified MHC/competitive/radioactivity	dissociation constant KD (~IC50)	0.4
FELCDNPFF	HLA-B44:03	MHC Binding	Positive-Intermediate	purified MHC/competitive/radioactivity	dissociation constant KD (~IC50)	0.6
FELCDNPFF	HLA-B45:01	MHC Binding	Negative	purified MHC/competitive/radioactivity	dissociation constant KD (~IC50)	8
FELLNAPAT	HLA-B18:01	MHC Binding	Positive-Intermediate	purified MHC/competitive/radioactivity	dissociation constant KD (~IC50)	1.8
FELLNAPAT	HLA-B40:01	MHC Binding	Positive-Low	purified MHC/competitive/radioactivity	dissociation constant KD (~IC50)	2
FELLNAPAT	HLA-B40:02	MHC Binding	Positive-High	purified MHC/competitive/radioactivity	dissociation constant KD (~IC50)	3.5
FELLNAPAT	HLA-B44:02	MHC Binding	Negative	purified MHC/competitive/radioactivity	dissociation constant KD (~IC50)	1.8
FELLNAPAT	HLA-B44:03	MHC Binding	Negative	purified MHC/competitive/radioactivity	dissociation constant KD (~IC50)	2
FELLNAPAT	HLA-B45:01	MHC Binding	Positive-Intermediate	purified MHC/competitive/radioactivity	dissociation constant KD (~IC50)	1.9
FERDISNVPF	HLA-B18:01	MHC Binding	Positive-High	purified MHC/competitive/radioactivity	dissociation constant KD (~IC50)	1.3
FERDISNVPF	HLA-B40:01	MHC Binding	Positive-High	purified MHC/competitive/radioactivity	dissociation constant KD (~IC50)	4
FERDISNVPF	HLA-B40:02	MHC Binding	Positive-Low	purified MHC/competitive/radioactivity	dissociation constant KD (~IC50)	4.5
FERDISNVPF	HLA-B44:02	MHC Binding	Positive-Low	purified MHC/competitive/radioactivity	dissociation constant KD (~IC50)	1.4
FERDISNVPF	HLA-B44:03	MHC Binding	Positive-Low	purified MHC/competitive/radioactivity	dissociation constant KD (~IC50)	1.4
FERDISNVPF	HLA-B45:01	MHC Binding	Negative	purified MHC/competitive/radioactivity	dissociation constant KD (~IC50)	4.5
FEYISDAFSL	HLA-B18:01	MHC Binding	Positive-Low	purified MHC/competitive/radioactivity	dissociation constant KD (~IC50)	1.5
FEYISDAFSL	HLA-B40:01	MHC Binding	Positive-High	purified MHC/competitive/radioactivity	dissociation constant KD (~IC50)	0.4
FEYISDAFSL	HLA-B40:02	MHC Binding	Positive-Low	purified MHC/competitive/radioactivity	dissociation constant KD (~IC50)	0.4
FEYISDAFSL	HLA-B44:02	MHC Binding	Positive-Low	purified MHC/competitive/radioactivity	dissociation constant KD (~IC50)	1.1
FEYISDAFSL	HLA-B44:03	MHC Binding	Positive-Low	purified MHC/competitive/radioactivity	dissociation constant KD (~IC50)	1
FEYISDAFSL	HLA-B45:01	MHC Binding	Negative	purified MHC/competitive/radioactivity	dissociation constant KD (~IC50)	7
FFTLGSITA	HLA-B58:01	MHC Binding	Negative	purified MHC	qualitative binding	42
FFTLGSITAQ	HLA-B58:01	MHC Binding	Negative	purified MHC	qualitative binding	75
FFTLGSITAQP	HLA-B58:01	MHC Binding	Negative	purified MHC	qualitative binding	90
FIAGLIAIV	HLA-A02:01	MHC Binding	Positive-High	purified MHC/competitive/radioactivity	half maximal inhibitory concentration (IC50)	0.17
FIAGLIAIV	HLA-A02:01	T Cell	Positive	ELISPOT	IFNg release	0.17
FIAGLIAIV	HLA-A02:01	T Cell	Negative	ELISPOT	IFNg release	0.17
FIAGLIAIV	HLA-A02:01	MHC Binding	Positive-High	purified MHC/competitive/radioactivity	dissociation constant KD (~IC50)	0.17
FIAGLIAIV	HLA-A02:01	T Cell	Positive	ELISA	IFNg release	0.17
FIAGLIAIV	HLA-A02:03	MHC Binding	Positive-High	purified MHC/competitive/radioactivity	dissociation constant KD (~IC50)	0.03
FIAGLIAIV	HLA-A02:03	MHC Binding	Positive-High	purified MHC/competitive/radioactivity	half maximal inhibitory concentration (IC50)	0.03
FIAGLIAIV	HLA-A68:02	MHC Binding	Positive-High	purified MHC/competitive/radioactivity	dissociation constant KD (~IC50)	0.06
FIAGLIAIV	HLA-A68:02	MHC Binding	Positive-High	purified MHC/competitive/radioactivity	half maximal inhibitory concentration (IC50)	0.06
FICNLLLLFV	HLA-A02:01	MHC Binding	Positive-High	purified MHC/competitive/radioactivity	half maximal inhibitory concentration (IC50)	1.4
FICNLLLLFV	HLA-A02:01	MHC Binding	Positive-High	purified MHC/competitive/radioactivity	dissociation constant KD (~IC50)	1.4
FICNLLLLFV	HLA-A02:03	MHC Binding	Positive-High	purified MHC/competitive/radioactivity	dissociation constant KD (~IC50)	0.9
FICNLLLLFV	HLA-A02:03	MHC Binding	Positive-High	purified MHC/competitive/radioactivity	half maximal inhibitory concentration (IC50)	0.9
FICNLLLLFV	HLA-A68:02	MHC Binding	Positive-Low	purified MHC/competitive/radioactivity	dissociation constant KD (~IC50)	1.3
FICNLLLLFV	HLA-A68:02	MHC Binding	Positive-Low	purified MHC/competitive/radioactivity	half maximal inhibitory concentration (IC50)	1.3
FIFLLFLTL	HLA-A02:01	MHC Binding	Negative	cellular MHC/direct/fluorescence	qualitative binding	0.8
FIFLLFLTL	HLA-A02:01	MHC Binding	Positive-Intermediate	purified MHC/competitive/radioactivity	half maximal inhibitory concentration (IC50)	0.8
FIFLLFLTL	HLA-A02:01	MHC Binding	Positive-Intermediate	purified MHC/competitive/radioactivity	dissociation constant KD (~IC50)	0.8
FIFLLFLTL	HLA-A02:01	T Cell	Negative	51 chromium	cytotoxicity	0.8
FIFLLFLTL	HLA-A02:01	T Cell	Negative	ELISPOT	IFNg release	0.8
FIFLLFLTL	HLA-A02:01	MHC Binding	Positive-Low	cellular MHC/direct/fluorescence	qualitative binding	0.8
FIFLLFLTL	HLA-A02:03	MHC Binding	Positive-Intermediate	purified MHC/competitive/radioactivity	half maximal inhibitory concentration (IC50)	0.3
FIFLLFLTL	HLA-A02:03	MHC Binding	Positive-Intermediate	purified MHC/competitive/radioactivity	dissociation constant KD (~IC50)	0.3
FIFLLFLTL	HLA-A68:02	MHC Binding	Positive-Intermediate	purified MHC/competitive/radioactivity	half maximal inhibitory concentration (IC50)	0.4
FIFLLFLTL	HLA-A68:02	MHC Binding	Positive-Intermediate	purified MHC/competitive/radioactivity	dissociation constant KD (~IC50)	0.4
FLAFLLFLV	HLA-A02:01	MHC Binding	Positive-High	purified MHC/competitive/radioactivity	dissociation constant KD (~IC50)	0.04
FLAFLLFLV	HLA-A02:01	MHC Binding	Positive-High	purified MHC/competitive/radioactivity	half maximal inhibitory concentration (IC50)	0.04
FLAFLLFLV	HLA-A02:03	MHC Binding	Positive-Intermediate	purified MHC/competitive/radioactivity	dissociation constant KD (~IC50)	0.12
FLAFLLFLV	HLA-A02:03	MHC Binding	Positive-Intermediate	purified MHC/competitive/radioactivity	half maximal inhibitory concentration (IC50)	0.12
FLAFLLFLV	HLA-A68:02	MHC Binding	Positive-Intermediate	purified MHC/competitive/radioactivity	dissociation constant KD (~IC50)	0.2
FLAFLLFLV	HLA-A68:02	MHC Binding	Positive-Intermediate	purified MHC/competitive/radioactivity	half maximal inhibitory concentration (IC50)	0.2
FLAFLLFLVL	HLA-A02:01	MHC Binding	Positive-High	purified MHC/competitive/radioactivity	dissociation constant KD (~IC50)	0.6
FLAFLLFLVL	HLA-A02:01	MHC Binding	Positive-High	purified MHC/competitive/radioactivity	half maximal inhibitory concentration (IC50)	0.6
FLAFLLFLVL	HLA-A02:03	MHC Binding	Positive-Intermediate	purified MHC/competitive/radioactivity	dissociation constant KD (~IC50)	0.6
FLAFLLFLVL	HLA-A02:03	MHC Binding	Positive-Intermediate	purified MHC/competitive/radioactivity	half maximal inhibitory concentration (IC50)	0.6
FLAFLLFLVL	HLA-A68:02	MHC Binding	Positive-Low	purified MHC/competitive/radioactivity	dissociation constant KD (~IC50)	1
FLAFLLFLVL	HLA-A68:02	MHC Binding	Positive-Low	purified MHC/competitive/radioactivity	half maximal inhibitory concentration (IC50)	1
FLAFVVFLL	HLA-A02:01	MHC Binding	Positive-High	purified MHC/competitive/radioactivity	dissociation constant KD (~IC50)	0.05
FLAFVVFLL	HLA-A02:01	MHC Binding	Positive-Low	cellular MHC/direct/fluorescence	qualitative binding	0.05
FLAFVVFLL	HLA-A02:01	MHC Binding	Positive	purified MHC	qualitative binding	0.05
FLAFVVFLL	HLA-A02:01	MHC Binding	Positive-High	purified MHC/competitive/radioactivity	half maximal inhibitory concentration (IC50)	0.05
FLAFVVFLL	HLA-A02:03	MHC Binding	Positive-Intermediate	purified MHC/competitive/radioactivity	dissociation constant KD (~IC50)	0.25
FLAFVVFLL	HLA-A02:03	MHC Binding	Positive-Intermediate	purified MHC/competitive/radioactivity	half maximal inhibitory concentration (IC50)	0.25
FLAFVVFLL	HLA-A68:02	MHC Binding	Positive-Intermediate	purified MHC/competitive/radioactivity	dissociation constant KD (~IC50)	0.1
FLAFVVFLL	HLA-A68:02	MHC Binding	Positive-Intermediate	purified MHC/competitive/radioactivity	half maximal inhibitory concentration (IC50)	0.1
FLAFVVFLLV	HLA-A02:01	MHC Binding	Positive-Intermediate	purified MHC/competitive/radioactivity	dissociation constant KD (~IC50)	0.15
FLAFVVFLLV	HLA-A02:01	MHC Binding	Positive-Intermediate	purified MHC/competitive/radioactivity	half maximal inhibitory concentration (IC50)	0.15
FLAFVVFLLV	HLA-A02:03	MHC Binding	Positive-Intermediate	purified MHC/competitive/radioactivity	dissociation constant KD (~IC50)	0.3
FLAFVVFLLV	HLA-A02:03	MHC Binding	Positive-Intermediate	purified MHC/competitive/radioactivity	half maximal inhibitory concentration (IC50)	0.3
FLAFVVFLLV	HLA-A68:02	MHC Binding	Positive-Low	purified MHC/competitive/radioactivity	half maximal inhibitory concentration (IC50)	0.3
FLAFVVFLLV	HLA-A68:02	MHC Binding	Positive-Low	purified MHC/competitive/radioactivity	dissociation constant KD (~IC50)	0.3
FLAHLQWFA	HLA-A02:01	MHC Binding	Positive-High	purified MHC/competitive/radioactivity	half maximal inhibitory concentration (IC50)	0.17
FLAHLQWFA	HLA-A02:03	MHC Binding	Positive-High	purified MHC/competitive/radioactivity	half maximal inhibitory concentration (IC50)	0.9
FLAHLQWFA	HLA-A68:02	MHC Binding	Positive-High	purified MHC/competitive/radioactivity	half maximal inhibitory concentration (IC50)	4
FLARAIVFV	HLA-A02:01	MHC Binding	Positive-High	purified MHC/competitive/radioactivity	half maximal inhibitory concentration (IC50)	0.02
FLARAIVFV	HLA-A02:03	MHC Binding	Positive-High	purified MHC/competitive/radioactivity	half maximal inhibitory concentration (IC50)	0.02
FLARAIVFV	HLA-A68:02	MHC Binding	Positive-High	purified MHC/competitive/radioactivity	half maximal inhibitory concentration (IC50)	0.15
FLAVFQSAT	HLA-A02:01	MHC Binding	Positive-High	purified MHC/competitive/radioactivity	half maximal inhibitory concentration (IC50)	1.4
FLAVFQSAT	HLA-A02:01	MHC Binding	Positive-High	purified MHC/competitive/radioactivity	dissociation constant KD (~IC50)	1.4
FLAVFQSAT	HLA-A02:03	MHC Binding	Positive-High	purified MHC/competitive/radioactivity	dissociation constant KD (~IC50)	1.5
FLAVFQSAT	HLA-A02:03	MHC Binding	Positive-High	purified MHC/competitive/radioactivity	half maximal inhibitory concentration (IC50)	1.5
FLAVFQSAT	HLA-A68:02	MHC Binding	Positive-Low	purified MHC/competitive/radioactivity	half maximal inhibitory concentration (IC50)	9.5
FLAVFQSAT	HLA-A68:02	MHC Binding	Positive-Low	purified MHC/competitive/radioactivity	dissociation constant KD (~IC50)	9.5
FLAVFQSATK	HLA-A03:01	MHC Binding	Positive-High	purified MHC/competitive/radioactivity	dissociation constant KD (~IC50)	1.9
FLAVFQSATK	HLA-A11:01	MHC Binding	Positive-Low	purified MHC/competitive/radioactivity	dissociation constant KD (~IC50)	6
FLAVFQSATK	HLA-A31:01	MHC Binding	Negative	purified MHC/competitive/radioactivity	dissociation constant KD (~IC50)	24
FLAVFQSATK	HLA-A68:01	MHC Binding	Positive-High	purified MHC/competitive/radioactivity	dissociation constant KD (~IC50)	3.5
FLCLFLLPSL	HLA-A02:01	MHC Binding	Positive-High	purified MHC/competitive/radioactivity	half maximal inhibitory concentration (IC50)	0.4
FLCLFLLPSL	HLA-A02:03	MHC Binding	Positive-High	purified MHC/competitive/radioactivity	half maximal inhibitory concentration (IC50)	0.7
FLCLFLLPSL	HLA-A68:02	MHC Binding	Positive-Low	purified MHC/competitive/radioactivity	half maximal inhibitory concentration (IC50)	7
FLFLAWIML	HLA-A02:01	MHC Binding	Positive-High	purified MHC/competitive/radioactivity	half maximal inhibitory concentration (IC50)	0.08
FLFLAWIML	HLA-A02:01	MHC Binding	Positive-High	purified MHC/competitive/radioactivity	dissociation constant KD (~IC50)	0.08
FLFLAWIML	HLA-A02:03	MHC Binding	Positive-High	purified MHC/competitive/radioactivity	dissociation constant KD (~IC50)	0.6
FLFLAWIML	HLA-A02:03	MHC Binding	Positive-High	purified MHC/competitive/radioactivity	half maximal inhibitory concentration (IC50)	0.6
FLFLAWIML	HLA-A68:02	MHC Binding	Positive-Low	purified MHC/competitive/radioactivity	half maximal inhibitory concentration (IC50)	2.5
FLFLAWIML	HLA-A68:02	MHC Binding	Positive-Low	purified MHC/competitive/radioactivity	dissociation constant KD (~IC50)	2.5
FLFLAWIMLL	HLA-A02:01	MHC Binding	Positive-Intermediate	purified MHC/competitive/radioactivity	half maximal inhibitory concentration (IC50)	0.2
FLFLAWIMLL	HLA-A02:01	MHC Binding	Positive-Intermediate	purified MHC/competitive/radioactivity	dissociation constant KD (~IC50)	0.2
FLFLAWIMLL	HLA-A02:03	MHC Binding	Positive-Intermediate	purified MHC/competitive/radioactivity	dissociation constant KD (~IC50)	0.25
FLFLAWIMLL	HLA-A02:03	MHC Binding	Positive-Intermediate	purified MHC/competitive/radioactivity	half maximal inhibitory concentration (IC50)	0.25
FLFLAWIMLL	HLA-A68:02	MHC Binding	Negative	cellular MHC/competitive/fluorescence	half maximal inhibitory concentration (IC50)	2.5
FLFLAWIMLL	HLA-A68:02	MHC Binding	Negative	purified MHC/competitive/radioactivity	dissociation constant KD (~IC50)	2.5
FLGRYMSAL	HLA-A02:01	MHC Binding	Positive-High	purified MHC/competitive/radioactivity	half maximal inhibitory concentration (IC50)	0.7
FLGRYMSAL	HLA-A02:03	MHC Binding	Positive-High	purified MHC/competitive/radioactivity	half maximal inhibitory concentration (IC50)	0.6
FLGRYMSAL	HLA-A68:02	MHC Binding	Negative	cellular MHC/competitive/fluorescence	half maximal inhibitory concentration (IC50)	12
FLILCFTIKR	HLA-A03:01	MHC Binding	Positive-Intermediate	purified MHC/competitive/radioactivity	dissociation constant KD (~IC50)	4
FLILCFTIKR	HLA-A11:01	MHC Binding	Positive-Low	purified MHC/competitive/radioactivity	dissociation constant KD (~IC50)	7
FLILCFTIKR	HLA-A31:01	MHC Binding	Positive-Intermediate	purified MHC/competitive/radioactivity	dissociation constant KD (~IC50)	3.5
FLILCFTIKR	HLA-A68:01	MHC Binding	Positive-High	purified MHC/competitive/radioactivity	dissociation constant KD (~IC50)	1.4
FLITGVFDI	HLA-A02:01	MHC Binding	Positive-High	purified MHC/competitive/radioactivity	half maximal inhibitory concentration (IC50)	0.2
FLITGVFDI	HLA-A02:03	MHC Binding	Positive-High	purified MHC/competitive/radioactivity	half maximal inhibitory concentration (IC50)	0.125
FLITGVFDI	HLA-A68:02	MHC Binding	Positive-Intermediate	purified MHC/competitive/radioactivity	half maximal inhibitory concentration (IC50)	2
FLIVAALVFL	HLA-A02:01	MHC Binding	Positive-High	purified MHC/competitive/radioactivity	dissociation constant KD (~IC50)	0.12
FLIVAALVFL	HLA-A02:01	MHC Binding	Positive-High	purified MHC/competitive/radioactivity	half maximal inhibitory concentration (IC50)	0.12
FLIVAALVFL	HLA-A02:03	MHC Binding	Positive-Intermediate	purified MHC/competitive/radioactivity	half maximal inhibitory concentration (IC50)	0.7
FLIVAALVFL	HLA-A02:03	MHC Binding	Positive-Intermediate	purified MHC/competitive/radioactivity	dissociation constant KD (~IC50)	0.7
FLIVAALVFL	HLA-A68:02	MHC Binding	Positive-Low	purified MHC/competitive/radioactivity	half maximal inhibitory concentration (IC50)	1.6
FLIVAALVFL	HLA-A68:02	MHC Binding	Positive-Low	purified MHC/competitive/radioactivity	dissociation constant KD (~IC50)	1.6
FLKEQHCQK	HLA-A03:01	MHC Binding	Positive-Intermediate	purified MHC/competitive/radioactivity	dissociation constant KD (~IC50)	3
FLKEQHCQK	HLA-A11:01	MHC Binding	Negative	purified MHC/competitive/radioactivity	dissociation constant KD (~IC50)	7.5
FLKEQHCQK	HLA-A31:01	MHC Binding	Positive-Low	purified MHC/competitive/radioactivity	dissociation constant KD (~IC50)	6.5
FLKEQHCQK	HLA-A68:01	MHC Binding	Positive-Low	purified MHC/competitive/radioactivity	dissociation constant KD (~IC50)	7
FLLFLVLIM	HLA-A02:01	MHC Binding	Positive-Intermediate	purified MHC/competitive/radioactivity	half maximal inhibitory concentration (IC50)	0.5
FLLFLVLIM	HLA-A02:01	MHC Binding	Positive-Intermediate	purified MHC/competitive/radioactivity	dissociation constant KD (~IC50)	0.5
FLLFLVLIM	HLA-A02:03	MHC Binding	Negative	cellular MHC/competitive/fluorescence	half maximal inhibitory concentration (IC50)	2.5
FLLFLVLIM	HLA-A02:03	MHC Binding	Negative	purified MHC/competitive/radioactivity	dissociation constant KD (~IC50)	2.5
FLLFLVLIM	HLA-A68:02	MHC Binding	Positive-Low	purified MHC/competitive/radioactivity	dissociation constant KD (~IC50)	19
FLLFLVLIM	HLA-A68:02	MHC Binding	Positive-Low	purified MHC/competitive/radioactivity	half maximal inhibitory concentration (IC50)	19
FLLFLVLIML	HLA-A02:01	MHC Binding	Positive-Intermediate	purified MHC/competitive/radioactivity	half maximal inhibitory concentration (IC50)	0.15
FLLFLVLIML	HLA-A02:01	MHC Binding	Positive-Intermediate	purified MHC/competitive/radioactivity	dissociation constant KD (~IC50)	0.15
FLLFLVLIML	HLA-A02:03	MHC Binding	Positive-Low	purified MHC/competitive/radioactivity	dissociation constant KD (~IC50)	1.7
FLLFLVLIML	HLA-A02:03	MHC Binding	Positive-Low	purified MHC/competitive/radioactivity	half maximal inhibitory concentration (IC50)	1.7
FLLFLVLIML	HLA-A68:02	MHC Binding	Negative	cellular MHC/competitive/fluorescence	half maximal inhibitory concentration (IC50)	6.5
FLLFLVLIML	HLA-A68:02	MHC Binding	Negative	purified MHC/competitive/radioactivity	dissociation constant KD (~IC50)	6.5
FLLNKEMYL	HLA-A02:01	MHC Binding	Positive-High	purified MHC/competitive/radioactivity	half maximal inhibitory concentration (IC50)	0.01
FLLNKEMYL	HLA-A02:03	MHC Binding	Positive-High	purified MHC/competitive/radioactivity	half maximal inhibitory concentration (IC50)	1.4
FLLNKEMYL	HLA-A68:02	MHC Binding	Negative	cellular MHC/competitive/fluorescence	half maximal inhibitory concentration (IC50)	8
FLLPSLATV	HLA-A02:01	MHC Binding	Positive-High	purified MHC/competitive/radioactivity	half maximal inhibitory concentration (IC50)	0.01
FLLPSLATV	HLA-A02:03	MHC Binding	Positive-High	purified MHC/competitive/radioactivity	half maximal inhibitory concentration (IC50)	0.01
FLLPSLATV	HLA-A68:02	MHC Binding	Positive-High	purified MHC/competitive/radioactivity	half maximal inhibitory concentration (IC50)	1.1
FLLVTLAIL	HLA-A02:01	MHC Binding	Positive	purified MHC	qualitative binding	0.15
FLLVTLAIL	HLA-A02:01	MHC Binding	Positive-High	purified MHC/competitive/radioactivity	half maximal inhibitory concentration (IC50)	0.15
FLLVTLAIL	HLA-A02:01	MHC Binding	Positive-High	purified MHC/competitive/radioactivity	dissociation constant KD (~IC50)	0.15
FLLVTLAIL	HLA-A02:01	MHC Binding	Positive-Low	cellular MHC/direct/fluorescence	qualitative binding	0.15
FLLVTLAIL	HLA-A02:03	MHC Binding	Positive-High	purified MHC/competitive/radioactivity	dissociation constant KD (~IC50)	0.9
FLLVTLAIL	HLA-A02:03	MHC Binding	Positive-High	purified MHC/competitive/radioactivity	half maximal inhibitory concentration (IC50)	0.9
FLLVTLAIL	HLA-A68:02	MHC Binding	Positive-Low	purified MHC/competitive/radioactivity	dissociation constant KD (~IC50)	10
FLLVTLAIL	HLA-A68:02	MHC Binding	Positive-Low	purified MHC/competitive/radioactivity	half maximal inhibitory concentration (IC50)	10
FLMSFTILCL	HLA-A02:01	MHC Binding	Positive-High	purified MHC/competitive/radioactivity	half maximal inhibitory concentration (IC50)	0.12
FLMSFTILCL	HLA-A02:03	MHC Binding	Positive-Intermediate	purified MHC/competitive/radioactivity	half maximal inhibitory concentration (IC50)	0.08
FLMSFTILCL	HLA-A68:02	MHC Binding	Negative	cellular MHC/competitive/fluorescence	half maximal inhibitory concentration (IC50)	5
FLNGSCGSV	HLA-A02:01	MHC Binding	Positive-High	purified MHC/competitive/radioactivity	half maximal inhibitory concentration (IC50)	0.25
FLNGSCGSV	HLA-A02:03	MHC Binding	Positive-High	purified MHC/competitive/radioactivity	half maximal inhibitory concentration (IC50)	0.15
FLNGSCGSV	HLA-A68:02	MHC Binding	Positive-Intermediate	purified MHC/competitive/radioactivity	half maximal inhibitory concentration (IC50)	9.5
FLNRFTTTL	HLA-A02:01	MHC Binding	Positive-High	purified MHC/competitive/radioactivity	half maximal inhibitory concentration (IC50)	0.17
FLNRFTTTL	HLA-A02:01	MHC Binding	Positive-High	purified MHC/competitive/radioactivity	dissociation constant KD (~IC50)	0.17
FLNRFTTTL	HLA-A02:03	MHC Binding	Positive-High	purified MHC/competitive/radioactivity	dissociation constant KD (~IC50)	0.08
FLNRFTTTL	HLA-A02:03	MHC Binding	Positive-High	purified MHC/competitive/radioactivity	half maximal inhibitory concentration (IC50)	0.08
FLNRFTTTL	HLA-A68:02	MHC Binding	Positive-Intermediate	purified MHC/competitive/radioactivity	dissociation constant KD (~IC50)	5.5
FLNRFTTTL	HLA-A68:02	MHC Binding	Positive-Intermediate	purified MHC/competitive/radioactivity	half maximal inhibitory concentration (IC50)	5.5
FLPRVFSAV	HLA-A02:01	MHC Binding	Positive-Intermediate	purified MHC/competitive/radioactivity	half maximal inhibitory concentration (IC50)	0.3
FLPRVFSAV	HLA-A02:03	MHC Binding	Positive-Intermediate	purified MHC/competitive/radioactivity	half maximal inhibitory concentration (IC50)	0.3
FLPRVFSAV	HLA-A68:02	MHC Binding	Positive-Low	purified MHC/competitive/radioactivity	half maximal inhibitory concentration (IC50)	1.3
FLTNKLLLFA	HLA-A02:01	MHC Binding	Positive-High	purified MHC/competitive/radioactivity	half maximal inhibitory concentration (IC50)	0.7
FLTNKLLLFA	HLA-A02:03	MHC Binding	Positive-High	purified MHC/competitive/radioactivity	half maximal inhibitory concentration (IC50)	0.6
FLTNKLLLFA	HLA-A68:02	MHC Binding	Negative	cellular MHC/competitive/fluorescence	half maximal inhibitory concentration (IC50)	11
FLTSLLILV	HLA-A02:01	MHC Binding	Positive-High	purified MHC/competitive/radioactivity	half maximal inhibitory concentration (IC50)	0.02
FLTSLLILV	HLA-A02:03	MHC Binding	Positive-High	purified MHC/competitive/radioactivity	half maximal inhibitory concentration (IC50)	0.12
FLTSLLILV	HLA-A68:02	MHC Binding	Positive-Intermediate	purified MHC/competitive/radioactivity	half maximal inhibitory concentration (IC50)	0.4
FLVLIMLII	HLA-A02:01	MHC Binding	Positive-Low	purified MHC/competitive/radioactivity	half maximal inhibitory concentration (IC50)	1.3
FLVLIMLII	HLA-A02:01	MHC Binding	Positive-Low	purified MHC/competitive/radioactivity	dissociation constant KD (~IC50)	1.3
FLVLIMLII	HLA-A02:03	MHC Binding	Negative	cellular MHC/competitive/fluorescence	half maximal inhibitory concentration (IC50)	1.2
FLVLIMLII	HLA-A02:03	MHC Binding	Negative	purified MHC/competitive/radioactivity	dissociation constant KD (~IC50)	1.2
FLVLIMLII	HLA-A68:02	MHC Binding	Positive-Low	purified MHC/competitive/radioactivity	dissociation constant KD (~IC50)	4.5
FLVLIMLII	HLA-A68:02	MHC Binding	Positive-Low	purified MHC/competitive/radioactivity	half maximal inhibitory concentration (IC50)	4.5
FLWLLWPVT	HLA-A02:01	MHC Binding	Positive-High	purified MHC/competitive/radioactivity	dissociation constant KD (~IC50)	0.8
FLWLLWPVT	HLA-A02:01	MHC Binding	Positive-High	purified MHC/competitive/radioactivity	half maximal inhibitory concentration (IC50)	0.8
FLWLLWPVT	HLA-A02:03	MHC Binding	Positive-High	purified MHC/competitive/radioactivity	dissociation constant KD (~IC50)	5.5
FLWLLWPVT	HLA-A02:03	MHC Binding	Positive-High	purified MHC/competitive/radioactivity	half maximal inhibitory concentration (IC50)	5.5
FLWLLWPVT	HLA-A68:02	MHC Binding	Positive-Low	purified MHC/competitive/radioactivity	dissociation constant KD (~IC50)	35
FLWLLWPVT	HLA-A68:02	MHC Binding	Positive-Low	purified MHC/competitive/radioactivity	half maximal inhibitory concentration (IC50)	35
FLWLLWPVTL	HLA-A02:01	MHC Binding	Positive-High	purified MHC/competitive/radioactivity	dissociation constant KD (~IC50)	0.03
FLWLLWPVTL	HLA-A02:01	MHC Binding	Positive-High	purified MHC/competitive/radioactivity	half maximal inhibitory concentration (IC50)	0.03
FLWLLWPVTL	HLA-A02:03	MHC Binding	Positive-High	purified MHC/competitive/radioactivity	half maximal inhibitory concentration (IC50)	0.175
FLWLLWPVTL	HLA-A02:03	MHC Binding	Positive-High	purified MHC/competitive/radioactivity	dissociation constant KD (~IC50)	0.175
FLWLLWPVTL	HLA-A68:02	MHC Binding	Negative	cellular MHC/competitive/fluorescence	half maximal inhibitory concentration (IC50)	4.5
FLWLLWPVTL	HLA-A68:02	MHC Binding	Negative	purified MHC/competitive/radioactivity	dissociation constant KD (~IC50)	4.5
FLYIIKLVFL	HLA-A02:01	MHC Binding	Positive-High	purified MHC/competitive/radioactivity	half maximal inhibitory concentration (IC50)	0.05
FLYIIKLVFL	HLA-A02:01	MHC Binding	Positive-High	purified MHC/competitive/radioactivity	dissociation constant KD (~IC50)	0.05
FLYIIKLVFL	HLA-A02:03	MHC Binding	Positive-High	purified MHC/competitive/radioactivity	half maximal inhibitory concentration (IC50)	0.15
FLYIIKLVFL	HLA-A02:03	MHC Binding	Positive-High	purified MHC/competitive/radioactivity	dissociation constant KD (~IC50)	0.15
FLYIIKLVFL	HLA-A68:02	MHC Binding	Negative	purified MHC/competitive/radioactivity	dissociation constant KD (~IC50)	0.7
FLYIIKLVFL	HLA-A68:02	MHC Binding	Negative	cellular MHC/competitive/fluorescence	half maximal inhibitory concentration (IC50)	0.7
FLYLYALIY	HLA-A03:01	MHC Binding	Negative	purified MHC/competitive/radioactivity	dissociation constant KD (~IC50)	0.17
FLYLYALIY	HLA-A11:01	MHC Binding	Negative	purified MHC/competitive/radioactivity	dissociation constant KD (~IC50)	8.5
FLYLYALIY	HLA-A31:01	MHC Binding	Negative	purified MHC/competitive/radioactivity	dissociation constant KD (~IC50)	24
FLYLYALIY	HLA-A68:01	MHC Binding	Negative	purified MHC/competitive/radioactivity	dissociation constant KD (~IC50)	20
FMGRIRSVY	HLA-B15:01	MHC Binding	Positive-High	purified MHC/direct/radioactivity	half life	1.5
FMGRIRSVY	HLA-B35:01	MHC Binding	Negative	purified MHC/direct/radioactivity	half life	3.5
FMMSRRRLL	HLA-A01:01	MHC Binding	Negative	purified MHC/competitive/radioactivity	dissociation constant KD (~IC50)	5.5
FMMSRRRLL	HLA-A23:01	MHC Binding	Positive-Intermediate	purified MHC/competitive/radioactivity	dissociation constant KD (~IC50)	5.5
FMMSRRRLL	HLA-A24:02	MHC Binding	Positive-Low	purified MHC/competitive/radioactivity	dissociation constant KD (~IC50)	4
FMMSRRRLL	HLA-A26:01	MHC Binding	Negative	purified MHC/competitive/radioactivity	dissociation constant KD (~IC50)	22
FMMSRRRLL	HLA-A29:02	MHC Binding	Positive-Low	purified MHC/competitive/radioactivity	dissociation constant KD (~IC50)	23
FMMSRRRLL	HLA-A30:02	MHC Binding	Negative	purified MHC/competitive/radioactivity	dissociation constant KD (~IC50)	11
FMRFFTLGSI	HLA-A02:01	MHC Binding	Positive-Intermediate	purified MHC/competitive/radioactivity	half maximal inhibitory concentration (IC50)	13
FMRFFTLGSI	HLA-A02:01	MHC Binding	Positive-Intermediate	purified MHC/competitive/radioactivity	dissociation constant KD (~IC50)	13
FMRFFTLGSI	HLA-A02:03	MHC Binding	Positive-High	purified MHC/competitive/radioactivity	half maximal inhibitory concentration (IC50)	1.1
FMRFFTLGSI	HLA-A02:03	MHC Binding	Positive-High	purified MHC/competitive/radioactivity	dissociation constant KD (~IC50)	1.1
FMRFFTLGSI	HLA-A68:02	MHC Binding	Positive-Intermediate	purified MHC/competitive/radioactivity	half maximal inhibitory concentration (IC50)	23
FMRFFTLGSI	HLA-A68:02	MHC Binding	Positive-Intermediate	purified MHC/competitive/radioactivity	dissociation constant KD (~IC50)	23
FNATKFPSVY	HLA-A01:01	MHC Binding	Negative	purified MHC/competitive/radioactivity	dissociation constant KD (~IC50)	5.5
FNATKFPSVY	HLA-A23:01	MHC Binding	Negative	purified MHC/competitive/radioactivity	dissociation constant KD (~IC50)	45
FNATKFPSVY	HLA-A24:02	MHC Binding	Negative	purified MHC/competitive/radioactivity	dissociation constant KD (~IC50)	28
FNATKFPSVY	HLA-A26:01	MHC Binding	Negative	purified MHC/competitive/radioactivity	dissociation constant KD (~IC50)	8
FNATKFPSVY	HLA-A29:02	MHC Binding	Positive-Low	purified MHC/competitive/radioactivity	dissociation constant KD (~IC50)	1.5
FNATKFPSVY	HLA-A30:02	MHC Binding	Positive-Low	purified MHC/competitive/radioactivity	dissociation constant KD (~IC50)	3
FPNITNLCPF	HLA-B07:02	MHC Binding	Positive-Intermediate	purified MHC/competitive/radioactivity	dissociation constant KD (~IC50)	2
FPNITNLCPF	HLA-B35:01	MHC Binding	Positive-High	purified MHC/competitive/radioactivity	dissociation constant KD (~IC50)	0.5
FPNITNLCPF	HLA-B51:01	MHC Binding	Positive-High	purified MHC/competitive/radioactivity	dissociation constant KD (~IC50)	7
FPNITNLCPF	HLA-B53:01	MHC Binding	Positive-High	purified MHC/competitive/radioactivity	dissociation constant KD (~IC50)	1
FPNITNLCPF	HLA-B54:01	MHC Binding	Positive-Intermediate	purified MHC/competitive/radioactivity	dissociation constant KD (~IC50)	1.7
FPPTSFGPL	HLA-A01:01	MHC Binding	Negative	purified MHC/direct/fluorescence	qualitative binding	21
FPPTSFGPL	HLA-A02:01	MHC Binding	Negative	purified MHC/direct/fluorescence	qualitative binding	18
FPPTSFGPL	HLA-A03:01	MHC Binding	Negative	purified MHC/direct/fluorescence	qualitative binding	28
FPPTSFGPL	HLA-A11:01	MHC Binding	Positive-Low	purified MHC/direct/fluorescence	dissociation constant KD (~EC50)	48
FPPTSFGPL	HLA-A24:02	MHC Binding	Negative	purified MHC/direct/fluorescence	qualitative binding	6.5
FPPTSFGPL	HLA-A26:01	MHC Binding	Negative	purified MHC/direct/fluorescence	qualitative binding	8
FPPTSFGPL	HLA-A31:01	MHC Binding	Negative	purified MHC/direct/fluorescence	qualitative binding	85
FPPTSFGPL	HLA-B07:02	MHC Binding	Positive	purified MHC/direct/fluorescence	qualitative binding	0.2
FPPTSFGPL	HLA-B07:02	MHC Binding	Positive-High	purified MHC/competitive/radioactivity	dissociation constant KD (~IC50)	0.2
FPPTSFGPL	HLA-B07:02	MHC Binding	Positive-Intermediate	purified MHC/direct/fluorescence	dissociation constant KD (~EC50)	0.2
FPPTSFGPL	HLA-B08:01	MHC Binding	Negative	purified MHC/direct/fluorescence	qualitative binding	18
FPPTSFGPL	HLA-B15:01	MHC Binding	Negative	purified MHC/direct/fluorescence	qualitative binding	46
FPPTSFGPL	HLA-B27:05	MHC Binding	Negative	purified MHC/direct/fluorescence	qualitative binding	47
FPPTSFGPL	HLA-B35:01	MHC Binding	Positive-Low	purified MHC/competitive/radioactivity	dissociation constant KD (~IC50)	1.8
FPPTSFGPL	HLA-B35:01	MHC Binding	Positive-Intermediate	purified MHC/direct/radioactivity	half life	1.8
FPPTSFGPL	HLA-B40:01	MHC Binding	Negative	purified MHC/direct/fluorescence	qualitative binding	20
FPPTSFGPL	HLA-B51:01	MHC Binding	Positive-Intermediate	purified MHC/competitive/radioactivity	dissociation constant KD (~IC50)	0.7
FPPTSFGPL	HLA-B53:01	MHC Binding	Negative	purified MHC/competitive/radioactivity	dissociation constant KD (~IC50)	3.5
FPPTSFGPL	HLA-B54:01	MHC Binding	Positive-Low	purified MHC/competitive/radioactivity	dissociation constant KD (~IC50)	2.5
FPPTSFGPL	HLA-B58:01	MHC Binding	Negative	purified MHC/direct/fluorescence	qualitative binding	70
FPPTSFGPL	HLA-C04:01	MHC Binding	Positive-Low	purified MHC/competitive/fluorescence	dissociation constant KD	4
FPPTSFGPL	HLA-C05:01	MHC Binding	Negative	purified MHC/direct/fluorescence	dissociation constant KD (~EC50)	13
FPPTSFGPL	HLA-C14:02	MHC Binding	Positive-Intermediate	purified MHC/competitive/fluorescence	dissociation constant KD	1.6
FPQAAPHGV	HLA-B07:02	MHC Binding	Positive-Low	purified MHC/direct/radioactivity	half life	0.9
FPQAAPHGV	HLA-B35:01	MHC Binding	Positive-Low	purified MHC/direct/radioactivity	half life	1.3
FPQAAPHGVV	HLA-B07:02	MHC Binding	Positive-Intermediate	purified MHC/competitive/radioactivity	dissociation constant KD (~IC50)	0.9
FPQAAPHGVV	HLA-B35:01	MHC Binding	Positive-Low	purified MHC/competitive/radioactivity	dissociation constant KD (~IC50)	3.5
FPQAAPHGVV	HLA-B51:01	MHC Binding	Positive-Intermediate	purified MHC/competitive/radioactivity	dissociation constant KD (~IC50)	1.8
FPQAAPHGVV	HLA-B53:01	MHC Binding	Positive-Low	purified MHC/competitive/radioactivity	dissociation constant KD (~IC50)	16
FPQAAPHGVV	HLA-B54:01	MHC Binding	Positive-High	purified MHC/competitive/radioactivity	dissociation constant KD (~IC50)	0.3
FPREGVFVF	HLA-A01:01	MHC Binding	Negative	purified MHC/direct/fluorescence	qualitative binding	18
FPREGVFVF	HLA-A02:01	MHC Binding	Negative	purified MHC/direct/fluorescence	qualitative binding	8
FPREGVFVF	HLA-A02:01	MHC Binding	Positive-Low	purified MHC/direct/radioactivity	half life	8
FPREGVFVF	HLA-A03:01	MHC Binding	Negative	purified MHC/direct/fluorescence	qualitative binding	23
FPREGVFVF	HLA-A11:01	MHC Binding	Negative	purified MHC/direct/fluorescence	qualitative binding	29
FPREGVFVF	HLA-A24:02	MHC Binding	Negative	purified MHC/direct/fluorescence	qualitative binding	1.2
FPREGVFVF	HLA-A26:01	MHC Binding	Negative	purified MHC/direct/fluorescence	qualitative binding	1.5
FPREGVFVF	HLA-A31:01	MHC Binding	Negative	purified MHC/direct/fluorescence	qualitative binding	22
FPREGVFVF	HLA-B07:02	MHC Binding	Positive-High	purified MHC/direct/radioactivity	half life	0.15
FPREGVFVF	HLA-B07:02	MHC Binding	Positive-Intermediate	purified MHC/direct/fluorescence	dissociation constant KD (~EC50)	0.15
FPREGVFVF	HLA-B07:02	MHC Binding	Positive	purified MHC/direct/fluorescence	qualitative binding	0.15
FPREGVFVF	HLA-B07:02	MHC Binding	Positive-High	purified MHC/competitive/radioactivity	dissociation constant KD (~IC50)	0.15
FPREGVFVF	HLA-B08:01	MHC Binding	Positive-Intermediate	purified MHC/direct/fluorescence	dissociation constant KD (~EC50)	1.4
FPREGVFVF	HLA-B15:01	MHC Binding	Positive-Low	purified MHC/direct/fluorescence	dissociation constant KD (~EC50)	1.1
FPREGVFVF	HLA-B15:01	MHC Binding	Negative	purified MHC/direct/fluorescence	qualitative binding	1.1
FPREGVFVF	HLA-B27:05	MHC Binding	Negative	purified MHC/direct/fluorescence	qualitative binding	15
FPREGVFVF	HLA-B35:01	MHC Binding	Positive-Intermediate	purified MHC/direct/radioactivity	half life	0.01
FPREGVFVF	HLA-B35:01	MHC Binding	Positive-High	purified MHC/competitive/radioactivity	dissociation constant KD (~IC50)	0.01
FPREGVFVF	HLA-B40:01	MHC Binding	Negative	purified MHC/direct/fluorescence	qualitative binding	18
FPREGVFVF	HLA-B51:01	MHC Binding	Positive-High	purified MHC/competitive/radioactivity	dissociation constant KD (~IC50)	0.25
FPREGVFVF	HLA-B53:01	MHC Binding	Positive-High	purified MHC/competitive/radioactivity	dissociation constant KD (~IC50)	0.03
FPREGVFVF	HLA-B54:01	MHC Binding	Positive-Intermediate	purified MHC/competitive/radioactivity	dissociation constant KD (~IC50)	0.05
FPREGVFVF	HLA-B58:01	MHC Binding	Negative	purified MHC/direct/fluorescence	qualitative binding	8
FPREGVFVF	HLA-C07:02	MHC Binding	Positive-Low	purified MHC/direct/fluorescence	dissociation constant KD (~EC50)	0.15
FPRGQGVPI	HLA-A01:01	MHC Binding	Negative	purified MHC/direct/fluorescence	qualitative binding	55
FPRGQGVPI	HLA-A02:01	MHC Binding	Positive-Low	purified MHC/direct/radioactivity	half life	12
FPRGQGVPI	HLA-A02:01	MHC Binding	Negative	purified MHC/direct/fluorescence	qualitative binding	12
FPRGQGVPI	HLA-A03:01	MHC Binding	Negative	purified MHC/direct/fluorescence	qualitative binding	31
FPRGQGVPI	HLA-A11:01	MHC Binding	Negative	purified MHC/direct/fluorescence	qualitative binding	46
FPRGQGVPI	HLA-A24:02	MHC Binding	Negative	purified MHC/direct/fluorescence	qualitative binding	24
FPRGQGVPI	HLA-A26:01	MHC Binding	Negative	purified MHC/direct/fluorescence	qualitative binding	26
FPRGQGVPI	HLA-A31:01	MHC Binding	Negative	purified MHC/direct/fluorescence	qualitative binding	38
FPRGQGVPI	HLA-B07:02	MHC Binding	Positive-High	purified MHC/direct/radioactivity	half life	0.17
FPRGQGVPI	HLA-B07:02	MHC Binding	Positive-High	purified MHC/direct/fluorescence	dissociation constant KD (~EC50)	0.17
FPRGQGVPI	HLA-B07:02	MHC Binding	Positive-High	purified MHC/competitive/radioactivity	dissociation constant KD (~IC50)	0.17
FPRGQGVPI	HLA-B07:02	MHC Binding	Positive	purified MHC/direct/fluorescence	qualitative binding	0.17
FPRGQGVPI	HLA-B08:01	MHC Binding	Positive-Intermediate	purified MHC/direct/fluorescence	dissociation constant KD (~EC50)	11
FPRGQGVPI	HLA-B15:01	MHC Binding	Negative	purified MHC/direct/fluorescence	qualitative binding	23
FPRGQGVPI	HLA-B27:05	MHC Binding	Negative	purified MHC/direct/fluorescence	qualitative binding	34
FPRGQGVPI	HLA-B35:01	MHC Binding	Negative	purified MHC/competitive/radioactivity	dissociation constant KD (~IC50)	3
FPRGQGVPI	HLA-B35:01	MHC Binding	Positive-Intermediate	purified MHC/direct/radioactivity	half life	3
FPRGQGVPI	HLA-B40:01	MHC Binding	Negative	purified MHC/direct/fluorescence	qualitative binding	29
FPRGQGVPI	HLA-B51:01	MHC Binding	Positive-Intermediate	purified MHC/competitive/radioactivity	dissociation constant KD (~IC50)	0.7
FPRGQGVPI	HLA-B53:01	MHC Binding	Positive-Low	purified MHC/competitive/radioactivity	dissociation constant KD (~IC50)	0.4
FPRGQGVPI	HLA-B54:01	MHC Binding	Positive-High	purified MHC/competitive/radioactivity	dissociation constant KD (~IC50)	0.125
FPRGQGVPI	HLA-B58:01	MHC Binding	Negative	purified MHC/direct/fluorescence	qualitative binding	55
FQFICNLLL	HLA-A02:01	MHC Binding	Positive-High	purified MHC/competitive/radioactivity	half maximal inhibitory concentration (IC50)	2.5
FQFICNLLL	HLA-A02:01	MHC Binding	Positive-High	purified MHC/competitive/radioactivity	dissociation constant KD (~IC50)	2.5
FQFICNLLL	HLA-A02:03	MHC Binding	Positive-High	purified MHC/competitive/radioactivity	half maximal inhibitory concentration (IC50)	3.5
FQFICNLLL	HLA-A02:03	MHC Binding	Positive-High	purified MHC/competitive/radioactivity	dissociation constant KD (~IC50)	3.5
FQFICNLLL	HLA-A68:02	MHC Binding	Negative	cellular MHC/competitive/fluorescence	half maximal inhibitory concentration (IC50)	5
FQFICNLLL	HLA-A68:02	MHC Binding	Negative	purified MHC/competitive/radioactivity	dissociation constant KD (~IC50)	5
FQFICNLLLL	HLA-A02:01	MHC Binding	Positive-High	purified MHC/competitive/radioactivity	dissociation constant KD (~IC50)	4
FQFICNLLLL	HLA-A02:01	MHC Binding	Positive-High	purified MHC/competitive/radioactivity	half maximal inhibitory concentration (IC50)	4
FQFICNLLLL	HLA-A02:03	MHC Binding	Positive-Intermediate	purified MHC/competitive/radioactivity	half maximal inhibitory concentration (IC50)	2.5
FQFICNLLLL	HLA-A02:03	MHC Binding	Positive-Intermediate	purified MHC/competitive/radioactivity	dissociation constant KD (~IC50)	2.5
FQFICNLLLL	HLA-A68:02	MHC Binding	Negative	purified MHC/competitive/radioactivity	dissociation constant KD (~IC50)	9.5
FQFICNLLLL	HLA-A68:02	MHC Binding	Negative	cellular MHC/competitive/fluorescence	half maximal inhibitory concentration (IC50)	9.5
FRYMNSQGL	HLA-C06:02	MHC Binding	Positive-High	purified MHC/direct/fluorescence	dissociation constant KD (~EC50)	0.06
FTERSDKSY	HLA-A01:01	MHC Binding	Positive-Low	purified MHC/direct/radioactivity	half life	0.05
FTERSDKSY	HLA-B35:01	MHC Binding	Negative	purified MHC/direct/radioactivity	half life	8
FTIAMWLLL	HLA-A02:01	MHC Binding	Positive-High	purified MHC/competitive/radioactivity	half maximal inhibitory concentration (IC50)	3
FTIAMWLLL	HLA-A02:03	MHC Binding	Positive-Low	purified MHC/competitive/radioactivity	half maximal inhibitory concentration (IC50)	3.5
FTIAMWLLL	HLA-A68:02	MHC Binding	Positive-High	purified MHC/competitive/radioactivity	half maximal inhibitory concentration (IC50)	0.4
FTLGIMAIA	HLA-A02:01	MHC Binding	Positive-High	purified MHC/competitive/radioactivity	half maximal inhibitory concentration (IC50)	3.5
FTLGIMAIA	HLA-A02:03	MHC Binding	Positive-High	purified MHC/competitive/radioactivity	half maximal inhibitory concentration (IC50)	7
FTLGIMAIA	HLA-A68:02	MHC Binding	Positive-High	purified MHC/competitive/radioactivity	half maximal inhibitory concentration (IC50)	2.5
FTLGSITAQ	HLA-B58:01	MHC Binding	Negative	purified MHC	qualitative binding	16
FTLGSITAQP	HLA-B58:01	MHC Binding	Negative	purified MHC	qualitative binding	21
FTLGSITAQPV	HLA-B58:01	MHC Binding	Negative	purified MHC	qualitative binding	60
FTLLFQLCT	HLA-A02:01	MHC Binding	Positive-Intermediate	purified MHC/competitive/radioactivity	half maximal inhibitory concentration (IC50)	14
FTLLFQLCT	HLA-A02:03	MHC Binding	Positive-Low	purified MHC/competitive/radioactivity	half maximal inhibitory concentration (IC50)	37
FTLLFQLCT	HLA-A68:02	MHC Binding	Positive-Low	purified MHC/competitive/radioactivity	half maximal inhibitory concentration (IC50)	20
FTNDVSFLA	HLA-A02:01	MHC Binding	Positive-High	purified MHC/competitive/radioactivity	half maximal inhibitory concentration (IC50)	1.7
FTNDVSFLA	HLA-A02:03	MHC Binding	Positive-High	purified MHC/competitive/radioactivity	half maximal inhibitory concentration (IC50)	8.5
FTNDVSFLA	HLA-A68:02	MHC Binding	Positive-High	purified MHC/competitive/radioactivity	half maximal inhibitory concentration (IC50)	1.1
FTSCELYHY	HLA-A01:01	MHC Binding	Positive-High	purified MHC/competitive/radioactivity	dissociation constant KD (~IC50)	0.2
FTSCELYHY	HLA-A23:01	MHC Binding	Negative	purified MHC/competitive/radioactivity	dissociation constant KD (~IC50)	20
FTSCELYHY	HLA-A24:02	MHC Binding	Negative	purified MHC/competitive/radioactivity	dissociation constant KD (~IC50)	22
FTSCELYHY	HLA-A26:01	MHC Binding	Positive-Low	purified MHC/competitive/radioactivity	dissociation constant KD (~IC50)	0.9
FTSCELYHY	HLA-A29:02	MHC Binding	Positive-High	purified MHC/competitive/radioactivity	dissociation constant KD (~IC50)	0.17
FTSCELYHY	HLA-A30:02	MHC Binding	Positive-Intermediate	purified MHC/competitive/radioactivity	dissociation constant KD (~IC50)	0.5
FTTSLSLHK	HLA-A03:01	MHC Binding	Positive-Low	purified MHC/competitive/radioactivity	dissociation constant KD (~IC50)	1.5
FTTSLSLHK	HLA-A11:01	MHC Binding	Positive-Intermediate	purified MHC/competitive/radioactivity	dissociation constant KD (~IC50)	0.5
FTTSLSLHK	HLA-A31:01	MHC Binding	Positive-Low	purified MHC/competitive/radioactivity	dissociation constant KD (~IC50)	14
FTTSLSLHK	HLA-A68:01	MHC Binding	Positive-Intermediate	purified MHC/competitive/radioactivity	dissociation constant KD (~IC50)	1.2
FTYASALWEI	HLA-A02:01	MHC Binding	Positive-High	purified MHC/competitive/radioactivity	half maximal inhibitory concentration (IC50)	4.5
FTYASALWEI	HLA-A02:03	MHC Binding	Positive-High	purified MHC/competitive/radioactivity	half maximal inhibitory concentration (IC50)	3
FTYASALWEI	HLA-A68:02	MHC Binding	Positive-High	purified MHC/competitive/radioactivity	half maximal inhibitory concentration (IC50)	1.7
FVASFRLFA	HLA-A02:01	MHC Binding	Positive-High	purified MHC/competitive/radioactivity	half maximal inhibitory concentration (IC50)	1.7
FVASFRLFA	HLA-A02:01	MHC Binding	Positive-High	purified MHC/competitive/radioactivity	dissociation constant KD (~IC50)	1.7
FVASFRLFA	HLA-A02:03	MHC Binding	Positive-High	purified MHC/competitive/radioactivity	half maximal inhibitory concentration (IC50)	1.4
FVASFRLFA	HLA-A02:03	MHC Binding	Positive-High	purified MHC/competitive/radioactivity	dissociation constant KD (~IC50)	1.4
FVASFRLFA	HLA-A68:02	MHC Binding	Positive-High	purified MHC/competitive/radioactivity	half maximal inhibitory concentration (IC50)	0.8
FVASFRLFA	HLA-A68:02	MHC Binding	Positive-High	purified MHC/competitive/radioactivity	dissociation constant KD (~IC50)	0.8
FVASFRLFAR	HLA-A03:01	MHC Binding	Positive-Intermediate	purified MHC/competitive/radioactivity	dissociation constant KD (~IC50)	1.5
FVASFRLFAR	HLA-A11:01	MHC Binding	Positive-High	purified MHC/competitive/radioactivity	dissociation constant KD (~IC50)	0.7
FVASFRLFAR	HLA-A31:01	MHC Binding	Positive-High	purified MHC/competitive/radioactivity	dissociation constant KD (~IC50)	0.7
FVASFRLFAR	HLA-A68:01	MHC Binding	Positive-High	purified MHC/competitive/radioactivity	dissociation constant KD (~IC50)	0.2
FVDEFYAYL	HLA-A02:01	MHC Binding	Positive-High	purified MHC/competitive/radioactivity	half maximal inhibitory concentration (IC50)	0.2
FVDEFYAYL	HLA-A02:03	MHC Binding	Positive-High	purified MHC/competitive/radioactivity	half maximal inhibitory concentration (IC50)	1.2
FVDEFYAYL	HLA-A68:02	MHC Binding	Positive-High	purified MHC/competitive/radioactivity	half maximal inhibitory concentration (IC50)	0.3
FVDGVPFVV	HLA-A02:01	MHC Binding	Positive-Intermediate	purified MHC/direct/radioactivity	half life	0.08
FVDGVPFVV	HLA-A02:01	MHC Binding	Positive-High	purified MHC/competitive/radioactivity	half maximal inhibitory concentration (IC50)	0.08
FVDGVPFVV	HLA-A02:03	MHC Binding	Positive-Intermediate	purified MHC/competitive/radioactivity	half maximal inhibitory concentration (IC50)	1.5
FVDGVPFVV	HLA-A68:02	MHC Binding	Positive-Intermediate	purified MHC/competitive/radioactivity	half maximal inhibitory concentration (IC50)	0.125
FVFNGTSWFI	HLA-A02:01	MHC Binding	Positive	cellular MHC/competitive/fluorescence	qualitative binding	2.5
FVFNGTSWFI	HLA-A02:01	MHC Binding	Positive	purified MHC/direct/fluorescence	qualitative binding	2.5
FVFNGTSWFI	HLA-A02:01	MHC Binding	Positive-High	purified MHC/competitive/radioactivity	half maximal inhibitory concentration (IC50)	2.5
FVFNGTSWFI	HLA-A02:01	T Cell	Negative	ELISPOT	IFNg release	2.5
FVFNGTSWFI	HLA-A02:01	MHC Binding	Positive-High	purified MHC/competitive/radioactivity	dissociation constant KD (~IC50)	2.5
FVFNGTSWFI	HLA-A02:03	MHC Binding	Positive-High	purified MHC/competitive/radioactivity	dissociation constant KD (~IC50)	4.5
FVFNGTSWFI	HLA-A02:03	MHC Binding	Positive-High	purified MHC/competitive/radioactivity	half maximal inhibitory concentration (IC50)	4.5
FVFNGTSWFI	HLA-A68:02	MHC Binding	Positive-High	purified MHC/competitive/radioactivity	half maximal inhibitory concentration (IC50)	0.5
FVFNGTSWFI	HLA-A68:02	MHC Binding	Positive-High	purified MHC/competitive/radioactivity	dissociation constant KD (~IC50)	0.5
FVLAAVYRI	HLA-A02:01	MHC Binding	Positive-High	purified MHC/competitive/radioactivity	dissociation constant KD (~IC50)	1.4
FVLAAVYRI	HLA-A02:01	MHC Binding	Positive-High	purified MHC/competitive/radioactivity	half maximal inhibitory concentration (IC50)	1.4
FVLAAVYRI	HLA-A02:03	MHC Binding	Positive-High	purified MHC/competitive/radioactivity	half maximal inhibitory concentration (IC50)	3.5
FVLAAVYRI	HLA-A02:03	MHC Binding	Positive-High	purified MHC/competitive/radioactivity	dissociation constant KD (~IC50)	3.5
FVLAAVYRI	HLA-A68:02	MHC Binding	Positive-High	purified MHC/competitive/radioactivity	dissociation constant KD (~IC50)	1
FVLAAVYRI	HLA-A68:02	MHC Binding	Positive-High	purified MHC/competitive/radioactivity	half maximal inhibitory concentration (IC50)	1
FVTIYSHLL	HLA-A02:01	MHC Binding	Positive-High	purified MHC/competitive/radioactivity	dissociation constant KD (~IC50)	2.5
FVTIYSHLL	HLA-A02:01	MHC Binding	Positive-High	purified MHC/competitive/radioactivity	half maximal inhibitory concentration (IC50)	2.5
FVTIYSHLL	HLA-A02:03	MHC Binding	Positive-Intermediate	purified MHC/competitive/radioactivity	half maximal inhibitory concentration (IC50)	8
FVTIYSHLL	HLA-A02:03	MHC Binding	Positive-Intermediate	purified MHC/competitive/radioactivity	dissociation constant KD (~IC50)	8
FVTIYSHLL	HLA-A68:02	MHC Binding	Positive-Intermediate	purified MHC/competitive/radioactivity	half maximal inhibitory concentration (IC50)	0.9
FVTIYSHLL	HLA-A68:02	MHC Binding	Positive-Intermediate	purified MHC/competitive/radioactivity	dissociation constant KD (~IC50)	0.9
FVVFLLVTL	HLA-A02:01	MHC Binding	Positive-Low	purified MHC/competitive/radioactivity	dissociation constant KD (~IC50)	0.7
FVVFLLVTL	HLA-A02:01	MHC Binding	Positive-Low	purified MHC/competitive/radioactivity	half maximal inhibitory concentration (IC50)	0.7
FVVFLLVTL	HLA-A02:03	MHC Binding	Positive-Low	purified MHC/competitive/radioactivity	half maximal inhibitory concentration (IC50)	0.5
FVVFLLVTL	HLA-A02:03	MHC Binding	Positive-Low	purified MHC/competitive/radioactivity	dissociation constant KD (~IC50)	0.5
FVVFLLVTL	HLA-A68:02	MHC Binding	Positive-Intermediate	purified MHC/competitive/radioactivity	half maximal inhibitory concentration (IC50)	0.08
FVVFLLVTL	HLA-A68:02	MHC Binding	Positive-Intermediate	purified MHC/competitive/radioactivity	dissociation constant KD (~IC50)	0.08
FYLCFLAFL	HLA-A01:01	MHC Binding	Negative	purified MHC/competitive/radioactivity	dissociation constant KD (~IC50)	21
FYLCFLAFL	HLA-A23:01	MHC Binding	Positive-High	purified MHC/competitive/radioactivity	dissociation constant KD (~IC50)	0.4
FYLCFLAFL	HLA-A24:02	MHC Binding	Positive-High	purified MHC/competitive/radioactivity	dissociation constant KD (~IC50)	0.25
FYLCFLAFL	HLA-A26:01	MHC Binding	Negative	purified MHC/competitive/radioactivity	dissociation constant KD (~IC50)	17
FYLCFLAFL	HLA-A29:02	MHC Binding	Negative	purified MHC/competitive/radioactivity	dissociation constant KD (~IC50)	3.5
FYLCFLAFL	HLA-A30:02	MHC Binding	Negative	purified MHC/competitive/radioactivity	dissociation constant KD (~IC50)	11
FYLCFLAFLL	HLA-A01:01	MHC Binding	Negative	purified MHC/competitive/radioactivity	dissociation constant KD (~IC50)	29
FYLCFLAFLL	HLA-A23:01	MHC Binding	Positive-High	purified MHC/competitive/radioactivity	dissociation constant KD (~IC50)	0.8
FYLCFLAFLL	HLA-A24:02	MHC Binding	Positive-High	purified MHC/competitive/radioactivity	dissociation constant KD (~IC50)	0.4
FYLCFLAFLL	HLA-A26:01	MHC Binding	Negative	purified MHC/competitive/radioactivity	dissociation constant KD (~IC50)	46
FYLCFLAFLL	HLA-A29:02	MHC Binding	Positive-Intermediate	purified MHC/competitive/radioactivity	dissociation constant KD (~IC50)	1.8
FYLCFLAFLL	HLA-A30:02	MHC Binding	Negative	purified MHC/competitive/radioactivity	dissociation constant KD (~IC50)	22
FYTTTGIGY	HLA-A01:01	MHC Binding	Positive-Intermediate	purified MHC/competitive/radioactivity	dissociation constant KD (~IC50)	3
FYTTTGIGY	HLA-A23:01	MHC Binding	Negative	purified MHC/competitive/radioactivity	dissociation constant KD (~IC50)	2.5
FYTTTGIGY	HLA-A24:02	MHC Binding	Negative	purified MHC/competitive/radioactivity	dissociation constant KD (~IC50)	1.2
FYTTTGIGY	HLA-A26:01	MHC Binding	Positive-Intermediate	purified MHC/competitive/radioactivity	dissociation constant KD (~IC50)	4
FYTTTGIGY	HLA-A29:02	MHC Binding	Negative	purified MHC/competitive/radioactivity	dissociation constant KD (~IC50)	0.17
FYTTTGIGY	HLA-A30:02	MHC Binding	Negative	purified MHC/competitive/radioactivity	dissociation constant KD (~IC50)	0.8
GAEHVDTSY	HLA-A01:01	MHC Binding	Positive-Intermediate	purified MHC/competitive/radioactivity	dissociation constant KD (~IC50)	0.9
GAEHVDTSY	HLA-A23:01	MHC Binding	Negative	purified MHC/competitive/radioactivity	dissociation constant KD (~IC50)	37
GAEHVDTSY	HLA-A24:02	MHC Binding	Negative	purified MHC/competitive/radioactivity	dissociation constant KD (~IC50)	44
GAEHVDTSY	HLA-A26:01	MHC Binding	Positive-Low	purified MHC/competitive/radioactivity	dissociation constant KD (~IC50)	11
GAEHVDTSY	HLA-A29:02	MHC Binding	Positive-Low	purified MHC/competitive/radioactivity	dissociation constant KD (~IC50)	0.4
GAEHVDTSY	HLA-A30:02	MHC Binding	Positive-Low	purified MHC/competitive/radioactivity	dissociation constant KD (~IC50)	0.9
GALDVSASV	HLA-A02:01	MHC Binding	Positive-High	purified MHC/competitive/radioactivity	half maximal inhibitory concentration (IC50)	0.6
GALDVSASV	HLA-A02:03	MHC Binding	Positive-High	purified MHC/competitive/radioactivity	half maximal inhibitory concentration (IC50)	3
GALDVSASV	HLA-A68:02	MHC Binding	Positive-High	purified MHC/competitive/radioactivity	half maximal inhibitory concentration (IC50)	1
GEILLLEWL	HLA-B18:01	MHC Binding	Positive-Low	purified MHC/competitive/radioactivity	dissociation constant KD (~IC50)	0.5
GEILLLEWL	HLA-B40:01	MHC Binding	Positive-High	purified MHC/competitive/radioactivity	dissociation constant KD (~IC50)	0.02
GEILLLEWL	HLA-B40:02	MHC Binding	Negative	purified MHC/competitive/radioactivity	dissociation constant KD (~IC50)	0.04
GEILLLEWL	HLA-B44:02	MHC Binding	Positive-High	purified MHC/competitive/radioactivity	dissociation constant KD (~IC50)	0.2
GEILLLEWL	HLA-B44:03	MHC Binding	Positive-High	purified MHC/competitive/radioactivity	dissociation constant KD (~IC50)	0.125
GEILLLEWL	HLA-B45:01	MHC Binding	Positive-Low	purified MHC/competitive/radioactivity	dissociation constant KD (~IC50)	2.5
GEILLLEWLA	HLA-B18:01	MHC Binding	Positive-Low	purified MHC/competitive/radioactivity	dissociation constant KD (~IC50)	10
GEILLLEWLA	HLA-B40:01	MHC Binding	Positive-High	purified MHC/competitive/radioactivity	dissociation constant KD (~IC50)	1.5
GEILLLEWLA	HLA-B40:02	MHC Binding	Negative	purified MHC/competitive/radioactivity	dissociation constant KD (~IC50)	2.5
GEILLLEWLA	HLA-B44:02	MHC Binding	Positive-Low	purified MHC/competitive/radioactivity	dissociation constant KD (~IC50)	1
GEILLLEWLA	HLA-B44:03	MHC Binding	Positive-Intermediate	purified MHC/competitive/radioactivity	dissociation constant KD (~IC50)	0.9
GEILLLEWLA	HLA-B45:01	MHC Binding	Positive-High	purified MHC/competitive/radioactivity	dissociation constant KD (~IC50)	0.6
GETALALLL	HLA-A02:01	MHC Binding	Negative	purified MHC	qualitative binding	11
GETALALLL	HLA-A02:07	MHC Binding	Negative	purified MHC	qualitative binding	15
GETALALLL	HLA-B18:01	MHC Binding	Negative	purified MHC/competitive/radioactivity	dissociation constant KD (~IC50)	2.5
GETALALLL	HLA-B40:01	MHC Binding	Positive	purified MHC	qualitative binding	0.1
GETALALLL	HLA-B40:01	MHC Binding	Positive-High	purified MHC/competitive/radioactivity	dissociation constant KD (~IC50)	0.1
GETALALLL	HLA-B40:02	MHC Binding	Positive-High	purified MHC/competitive/radioactivity	dissociation constant KD (~IC50)	0.25
GETALALLL	HLA-B44:02	MHC Binding	Positive-High	purified MHC/competitive/radioactivity	dissociation constant KD (~IC50)	0.2
GETALALLL	HLA-B44:03	MHC Binding	Positive-High	purified MHC/competitive/radioactivity	dissociation constant KD (~IC50)	0.15
GETALALLL	HLA-B45:01	MHC Binding	Positive-Intermediate	purified MHC/competitive/radioactivity	dissociation constant KD (~IC50)	3
GETALALLL	HLA-B46:01	MHC Binding	Negative	purified MHC	qualitative binding	65
GETALALLLL	HLA-A02:01	MHC Binding	Negative	purified MHC	qualitative binding	11
GETALALLLL	HLA-A02:07	MHC Binding	Negative	purified MHC	qualitative binding	19
GETALALLLL	HLA-B18:01	MHC Binding	Negative	purified MHC/competitive/radioactivity	dissociation constant KD (~IC50)	11
GETALALLLL	HLA-B40:01	T Cell	Positive	ICS	CCL4/MIP-1b release	0.25
GETALALLLL	HLA-B40:01	T Cell	Positive	ICS	CCL3/MIP-1a release	0.25
GETALALLLL	HLA-B40:01	T Cell	Positive	ICS	IFNg release	0.25
GETALALLLL	HLA-B40:01	MHC Binding	Positive	purified MHC	qualitative binding	0.25
GETALALLLL	HLA-B40:01	T Cell	Positive	ELISPOT	IFNg release	0.25
GETALALLLL	HLA-B40:01	T Cell	Negative	ICS	IL-4 release	0.25
GETALALLLL	HLA-B40:01	T Cell	Positive-Low	ICS	IL-8 release	0.25
GETALALLLL	HLA-B40:01	T Cell	Positive-Low	ICS	GM-CSF release	0.25
GETALALLLL	HLA-B40:01	MHC Binding	Positive-High	purified MHC/competitive/radioactivity	dissociation constant KD (~IC50)	0.25
GETALALLLL	HLA-B40:01	T Cell	Positive	ICS	IL-2 release	0.25
GETALALLLL	HLA-B40:01	T Cell	Positive	multimer/tetramer	qualitative binding	0.25
GETALALLLL	HLA-B40:01	T Cell	Positive	biological activity	degranulation	0.25
GETALALLLL	HLA-B40:01	T Cell	Negative	ICS	IL-10 release	0.25
GETALALLLL	HLA-B40:01	T Cell	Positive	ICS	TNFa release	0.25
GETALALLLL	HLA-B40:02	MHC Binding	Positive-High	purified MHC/competitive/radioactivity	dissociation constant KD (~IC50)	0.5
GETALALLLL	HLA-B44:02	MHC Binding	Positive-Low	purified MHC/competitive/radioactivity	dissociation constant KD (~IC50)	0.3
GETALALLLL	HLA-B44:03	MHC Binding	Positive-Intermediate	purified MHC/competitive/radioactivity	dissociation constant KD (~IC50)	0.2
GETALALLLL	HLA-B45:01	MHC Binding	Positive-Low	purified MHC/competitive/radioactivity	dissociation constant KD (~IC50)	5
GETALALLLL	HLA-B46:01	MHC Binding	Negative	purified MHC	qualitative binding	85
GETALALLLLD	HLA-A02:01	MHC Binding	Negative	purified MHC	qualitative binding	70
GETALALLLLD	HLA-A02:07	MHC Binding	Negative	purified MHC	qualitative binding	85
GETALALLLLD	HLA-B40:01	MHC Binding	Negative	purified MHC	qualitative binding	6
GETALALLLLD	HLA-B46:01	MHC Binding	Negative	purified MHC	qualitative binding	100
GETALALLLLDRLNQ	HLA-A02:01	MHC Binding	Positive	purified MHC	qualitative binding	100
GETALALLLLDRLNQ	HLA-A02:07	MHC Binding	Positive	purified MHC	qualitative binding	100
GETALALLLLDRLNQ	HLA-B40:01	MHC Binding	Positive	purified MHC	qualitative binding	36
GETALALLLLDRLNQ	HLA-B46:01	MHC Binding	Positive	purified MHC	qualitative binding	100
GEVFNATKF	HLA-A01:01	MHC Binding	Negative	purified MHC/direct/fluorescence	qualitative binding	41
GEVFNATKF	HLA-A02:01	MHC Binding	Negative	purified MHC/direct/fluorescence	qualitative binding	37
GEVFNATKF	HLA-A03:01	MHC Binding	Negative	purified MHC/direct/fluorescence	qualitative binding	30
GEVFNATKF	HLA-A24:02	MHC Binding	Negative	purified MHC/direct/fluorescence	qualitative binding	6
GEVFNATKF	HLA-B07:02	MHC Binding	Negative	purified MHC/direct/fluorescence	qualitative binding	22
GEVFNATKF	HLA-B15:01	MHC Binding	Negative	purified MHC/direct/fluorescence	qualitative binding	1.8
GEVFNATKF	HLA-B40:01	MHC Binding	Positive	purified MHC/direct/fluorescence	qualitative binding	0.2
GEVFNATKF	HLA-B58:01	MHC Binding	Negative	purified MHC/direct/fluorescence	qualitative binding	8
GFAAYNRYR	HLA-A03:01	MHC Binding	Negative	purified MHC/competitive/radioactivity	dissociation constant KD (~IC50)	8
GFAAYNRYR	HLA-A11:01	MHC Binding	Negative	purified MHC/competitive/radioactivity	dissociation constant KD (~IC50)	3
GFAAYNRYR	HLA-A31:01	MHC Binding	Positive-Low	purified MHC/competitive/radioactivity	dissociation constant KD (~IC50)	0.6
GFAAYNRYR	HLA-A68:01	MHC Binding	Negative	purified MHC/competitive/radioactivity	dissociation constant KD (~IC50)	3.5
GFNTLKPIFK	HLA-A03:01	MHC Binding	Positive-Intermediate	purified MHC/competitive/radioactivity	dissociation constant KD (~IC50)	2.5
GFNTLKPIFK	HLA-A11:01	MHC Binding	Positive-Intermediate	purified MHC/competitive/radioactivity	dissociation constant KD (~IC50)	1.1
GFNTLKPIFK	HLA-A31:01	MHC Binding	Positive-Low	purified MHC/competitive/radioactivity	dissociation constant KD (~IC50)	5.5
GFNTLKPIFK	HLA-A68:01	MHC Binding	Positive-Low	purified MHC/competitive/radioactivity	dissociation constant KD (~IC50)	10
GLIAIVMVTI	HLA-A02:01	MHC Binding	Positive-Intermediate	purified MHC/competitive/radioactivity	dissociation constant KD (~IC50)	0.6
GLIAIVMVTI	HLA-A02:01	MHC Binding	Positive-Intermediate	purified MHC/competitive/radioactivity	half maximal inhibitory concentration (IC50)	0.6
GLIAIVMVTI	HLA-A02:03	MHC Binding	Positive-High	purified MHC/competitive/radioactivity	dissociation constant KD (~IC50)	0.175
GLIAIVMVTI	HLA-A02:03	MHC Binding	Positive-High	purified MHC/competitive/radioactivity	half maximal inhibitory concentration (IC50)	0.175
GLIAIVMVTI	HLA-A68:02	MHC Binding	Positive-Low	purified MHC/competitive/radioactivity	half maximal inhibitory concentration (IC50)	1.8
GLIAIVMVTI	HLA-A68:02	MHC Binding	Positive-Low	purified MHC/competitive/radioactivity	dissociation constant KD (~IC50)	1.8
GLMWLSYFV	HLA-A01:01	MHC Binding	Negative	purified MHC/direct/fluorescence	qualitative binding	12
GLMWLSYFV	HLA-A02:01	MHC Binding	Positive-High	purified MHC/direct/radioactivity	half life	0.04
GLMWLSYFV	HLA-A02:01	MHC Binding	Negative	purified MHC/direct/fluorescence	qualitative binding	0.04
GLMWLSYFV	HLA-A02:01	MHC Binding	Positive-High	purified MHC/competitive/radioactivity	half maximal inhibitory concentration (IC50)	0.04
GLMWLSYFV	HLA-A02:01	MHC Binding	Positive-High	purified MHC/competitive/radioactivity	dissociation constant KD (~IC50)	0.04
GLMWLSYFV	HLA-A02:01	MHC Binding	Positive-Low	purified MHC/direct/fluorescence	dissociation constant KD (~EC50)	0.04
GLMWLSYFV	HLA-A02:03	MHC Binding	Positive-High	purified MHC/competitive/radioactivity	half maximal inhibitory concentration (IC50)	1.2
GLMWLSYFV	HLA-A02:03	MHC Binding	Positive-High	purified MHC/competitive/radioactivity	dissociation constant KD (~IC50)	1.2
GLMWLSYFV	HLA-A03:01	MHC Binding	Negative	purified MHC/direct/fluorescence	dissociation constant KD (~EC50)	16
GLMWLSYFV	HLA-A03:01	MHC Binding	Negative	purified MHC/direct/fluorescence	qualitative binding	16
GLMWLSYFV	HLA-A11:01	MHC Binding	Negative	purified MHC/direct/fluorescence	qualitative binding	10
GLMWLSYFV	HLA-A24:02	MHC Binding	Negative	purified MHC/direct/fluorescence	qualitative binding	16
GLMWLSYFV	HLA-A26:01	MHC Binding	Negative	purified MHC/direct/fluorescence	qualitative binding	27
GLMWLSYFV	HLA-A31:01	MHC Binding	Negative	purified MHC/direct/fluorescence	qualitative binding	17
GLMWLSYFV	HLA-A68:02	MHC Binding	Positive-High	purified MHC/competitive/radioactivity	half maximal inhibitory concentration (IC50)	5
GLMWLSYFV	HLA-A68:02	MHC Binding	Positive-High	purified MHC/competitive/radioactivity	dissociation constant KD (~IC50)	5
GLMWLSYFV	HLA-B07:02	MHC Binding	Negative	purified MHC/direct/fluorescence	qualitative binding	21
GLMWLSYFV	HLA-B08:01	MHC Binding	Negative	purified MHC/direct/fluorescence	qualitative binding	20
GLMWLSYFV	HLA-B15:01	MHC Binding	Negative	purified MHC/direct/fluorescence	qualitative binding	15
GLMWLSYFV	HLA-B27:05	MHC Binding	Negative	purified MHC/direct/fluorescence	qualitative binding	16
GLMWLSYFV	HLA-B40:01	MHC Binding	Negative	purified MHC/direct/fluorescence	qualitative binding	15
GLMWLSYFV	HLA-B58:01	MHC Binding	Negative	purified MHC/direct/fluorescence	qualitative binding	42
GLMWLSYFVA	HLA-A02:01	MHC Binding	Positive-High	purified MHC/competitive/radioactivity	half maximal inhibitory concentration (IC50)	1.7
GLMWLSYFVA	HLA-A02:01	MHC Binding	Positive-High	purified MHC/competitive/radioactivity	dissociation constant KD (~IC50)	1.7
GLMWLSYFVA	HLA-A02:03	MHC Binding	Positive-Intermediate	purified MHC/competitive/radioactivity	half maximal inhibitory concentration (IC50)	8.5
GLMWLSYFVA	HLA-A02:03	MHC Binding	Positive-Intermediate	purified MHC/competitive/radioactivity	dissociation constant KD (~IC50)	8.5
GLMWLSYFVA	HLA-A68:02	MHC Binding	Positive-Low	purified MHC/competitive/radioactivity	dissociation constant KD (~IC50)	42
GLMWLSYFVA	HLA-A68:02	MHC Binding	Positive-Low	purified MHC/competitive/radioactivity	half maximal inhibitory concentration (IC50)	42
GLSDRVVFV	HLA-A02:01	MHC Binding	Positive-High	purified MHC/competitive/radioactivity	half maximal inhibitory concentration (IC50)	0.01
GLSDRVVFV	HLA-A02:03	MHC Binding	Positive-High	purified MHC/competitive/radioactivity	half maximal inhibitory concentration (IC50)	0.01
GLSDRVVFV	HLA-A68:02	MHC Binding	Positive-Low	purified MHC/competitive/radioactivity	half maximal inhibitory concentration (IC50)	0.4
GMEAQFLYL	HLA-A02:01	MHC Binding	Positive-Intermediate	purified MHC/competitive/radioactivity	dissociation constant KD (~IC50)	3
GMEAQFLYL	HLA-A02:01	MHC Binding	Positive-Intermediate	purified MHC/competitive/radioactivity	half maximal inhibitory concentration (IC50)	3
GMEAQFLYL	HLA-A02:03	MHC Binding	Positive-Intermediate	purified MHC/competitive/radioactivity	half maximal inhibitory concentration (IC50)	3
GMEAQFLYL	HLA-A02:03	MHC Binding	Positive-Intermediate	purified MHC/competitive/radioactivity	dissociation constant KD (~IC50)	3
GMEAQFLYL	HLA-A68:02	MHC Binding	Negative	cellular MHC/competitive/fluorescence	half maximal inhibitory concentration (IC50)	12
GMEAQFLYL	HLA-A68:02	MHC Binding	Negative	purified MHC/competitive/radioactivity	dissociation constant KD (~IC50)	12
GMEAQFLYLY	HLA-A01:01	MHC Binding	Positive-Intermediate	purified MHC/competitive/radioactivity	dissociation constant KD (~IC50)	0.8
GMEAQFLYLY	HLA-A23:01	MHC Binding	Negative	purified MHC/competitive/radioactivity	dissociation constant KD (~IC50)	33
GMEAQFLYLY	HLA-A24:02	MHC Binding	Negative	purified MHC/competitive/radioactivity	dissociation constant KD (~IC50)	35
GMEAQFLYLY	HLA-A26:01	MHC Binding	Negative	purified MHC/competitive/radioactivity	dissociation constant KD (~IC50)	45
GMEAQFLYLY	HLA-A29:02	MHC Binding	Positive-High	purified MHC/competitive/radioactivity	dissociation constant KD (~IC50)	0.7
GMEAQFLYLY	HLA-A30:02	MHC Binding	Positive-Intermediate	purified MHC/competitive/radioactivity	dissociation constant KD (~IC50)	1
GMEVTPSGT	HLA-B40:01	MHC Binding	Negative	purified MHC	qualitative binding	14
GMEVTPSGTW	HLA-B40:01	MHC Binding	Negative	purified MHC	qualitative binding	12
GMEVTPSGTWL	HLA-B40:01	MHC Binding	Positive	purified MHC	qualitative binding	5
GMKRSFYVY	HLA-A01:01	MHC Binding	Negative	purified MHC/direct/fluorescence	qualitative binding	6.5
GMKRSFYVY	HLA-A01:01	MHC Binding	Negative	purified MHC/competitive/radioactivity	dissociation constant KD (~IC50)	6.5
GMKRSFYVY	HLA-A02:01	MHC Binding	Negative	purified MHC/direct/fluorescence	qualitative binding	25
GMKRSFYVY	HLA-A03:01	MHC Binding	Positive-Low	purified MHC/direct/fluorescence	dissociation constant KD (~EC50)	8.5
GMKRSFYVY	HLA-A03:01	MHC Binding	Negative	purified MHC/direct/radioactivity	half life	8.5
GMKRSFYVY	HLA-A03:01	MHC Binding	Negative	purified MHC/direct/fluorescence	qualitative binding	8.5
GMKRSFYVY	HLA-A11:01	MHC Binding	Negative	purified MHC/direct/fluorescence	dissociation constant KD (~EC50)	16
GMKRSFYVY	HLA-A23:01	MHC Binding	Negative	purified MHC/competitive/radioactivity	dissociation constant KD (~IC50)	11
GMKRSFYVY	HLA-A24:02	MHC Binding	Negative	purified MHC/competitive/radioactivity	dissociation constant KD (~IC50)	17
GMKRSFYVY	HLA-A24:02	MHC Binding	Negative	purified MHC/direct/fluorescence	qualitative binding	17
GMKRSFYVY	HLA-A26:01	MHC Binding	Negative	purified MHC/direct/fluorescence	qualitative binding	11
GMKRSFYVY	HLA-A26:01	MHC Binding	Negative	purified MHC/competitive/radioactivity	dissociation constant KD (~IC50)	11
GMKRSFYVY	HLA-A29:02	MHC Binding	Positive-Intermediate	purified MHC/competitive/radioactivity	dissociation constant KD (~IC50)	1.5
GMKRSFYVY	HLA-A30:02	MHC Binding	Positive-High	purified MHC/competitive/radioactivity	dissociation constant KD (~IC50)	0.4
GMKRSFYVY	HLA-A31:01	MHC Binding	Positive-Intermediate	purified MHC/direct/fluorescence	dissociation constant KD (~EC50)	6.5
GMKRSFYVY	HLA-B07:02	MHC Binding	Negative	purified MHC/direct/fluorescence	qualitative binding	33
GMKRSFYVY	HLA-B08:01	MHC Binding	Negative	purified MHC/direct/fluorescence	qualitative binding	16
GMKRSFYVY	HLA-B15:01	MHC Binding	Positive	purified MHC/direct/fluorescence	qualitative binding	0.25
GMKRSFYVY	HLA-B15:01	MHC Binding	Positive-Intermediate	purified MHC/direct/fluorescence	dissociation constant KD (~EC50)	0.25
GMKRSFYVY	HLA-B15:01	MHC Binding	Positive-High	purified MHC/direct/radioactivity	half life	0.25
GMKRSFYVY	HLA-B27:05	MHC Binding	Positive-Low	purified MHC/direct/fluorescence	dissociation constant KD (~EC50)	10
GMKRSFYVY	HLA-B40:01	MHC Binding	Negative	purified MHC/direct/fluorescence	qualitative binding	14
GMKRSFYVY	HLA-B58:01	MHC Binding	Negative	purified MHC/direct/fluorescence	qualitative binding	13
GMSRIGMEV	HLA-A02:01	MHC Binding	Positive-High	purified MHC/competitive/fluorescence	dissociation constant KD	1.1
GMSRIGMEV	HLA-A02:01	MHC Binding	Positive	cellular MHC/direct/fluorescence	qualitative binding	1.1
GMSRIGMEV	HLA-A02:01	T Cell	Positive	ELISA	IFNg release	1.1
GMSRIGMEV	HLA-A02:01	T Cell	Positive-Intermediate	ELISPOT	IFNg release	1.1
GMSRIGMEV	HLA-A02:01	MHC Binding	Positive-High	cellular MHC/direct/fluorescence	qualitative binding	1.1
GMSRIGMEV	HLA-A02:01	T Cell	Positive	ELISPOT	IFNg release	1.1
GMSRIGMEV	HLA-A02:01	MHC Binding	Negative	purified MHC/direct/fluorescence	qualitative binding	1.1
GPDDQIGYY	HLA-A01:01	MHC Binding	Negative	purified MHC/competitive/radioactivity	dissociation constant KD (~IC50)	0.25
GPDDQIGYY	HLA-A23:01	MHC Binding	Negative	purified MHC/competitive/radioactivity	dissociation constant KD (~IC50)	41
GPDDQIGYY	HLA-A24:02	MHC Binding	Negative	purified MHC/competitive/radioactivity	dissociation constant KD (~IC50)	34
GPDDQIGYY	HLA-A26:01	MHC Binding	Negative	purified MHC/competitive/radioactivity	dissociation constant KD (~IC50)	1.9
GPDDQIGYY	HLA-A29:02	MHC Binding	Negative	purified MHC/competitive/radioactivity	dissociation constant KD (~IC50)	0.6
GPDDQIGYY	HLA-A30:02	MHC Binding	Positive-Low	purified MHC/competitive/radioactivity	dissociation constant KD (~IC50)	0.3
GPQSNQRSA	HLA-B07:02	MHC Binding	Positive-Intermediate	purified MHC/competitive/radioactivity	dissociation constant KD (~IC50)	1.7
GPQSNQRSA	HLA-B35:01	MHC Binding	Negative	purified MHC/competitive/radioactivity	dissociation constant KD (~IC50)	19
GPQSNQRSA	HLA-B51:01	MHC Binding	Negative	purified MHC/competitive/radioactivity	dissociation constant KD (~IC50)	18
GPQSNQRSA	HLA-B53:01	MHC Binding	Negative	purified MHC/competitive/radioactivity	dissociation constant KD (~IC50)	8
GPQSNQRSA	HLA-B54:01	MHC Binding	Negative	purified MHC/competitive/radioactivity	dissociation constant KD (~IC50)	0.9
GQGQNSADPK	HLA-A03:01	MHC Binding	Negative	purified MHC/competitive/radioactivity	dissociation constant KD (~IC50)	12
GQGQNSADPK	HLA-A11:01	MHC Binding	Positive-Low	purified MHC/competitive/radioactivity	dissociation constant KD (~IC50)	5
GQGQNSADPK	HLA-A31:01	MHC Binding	Negative	purified MHC/competitive/radioactivity	dissociation constant KD (~IC50)	48
GQGQNSADPK	HLA-A68:01	MHC Binding	Negative	purified MHC/competitive/radioactivity	dissociation constant KD (~IC50)	43
GQQQQGQTV	HLA-A02:01	MHC Binding	Negative	cellular MHC/direct/fluorescence	qualitative binding	3
GQTGVIADY	HLA-A01:01	MHC Binding	Negative	purified MHC/direct/fluorescence	qualitative binding	13
GQTGVIADY	HLA-A01:01	MHC Binding	Negative	purified MHC/direct/fluorescence	dissociation constant KD (~EC50)	13
GQTGVIADY	HLA-A02:01	MHC Binding	Negative	purified MHC/direct/fluorescence	qualitative binding	15
GQTGVIADY	HLA-A03:01	MHC Binding	Negative	purified MHC/direct/fluorescence	qualitative binding	5
GQTGVIADY	HLA-A11:01	MHC Binding	Negative	purified MHC/direct/fluorescence	dissociation constant KD (~EC50)	5.5
GQTGVIADY	HLA-A24:02	MHC Binding	Negative	purified MHC/direct/fluorescence	qualitative binding	29
GQTGVIADY	HLA-A26:01	MHC Binding	Negative	purified MHC/direct/fluorescence	qualitative binding	2.5
GQTGVIADY	HLA-A31:01	MHC Binding	Negative	purified MHC/direct/fluorescence	qualitative binding	18
GQTGVIADY	HLA-B07:02	MHC Binding	Negative	purified MHC/direct/fluorescence	qualitative binding	31
GQTGVIADY	HLA-B08:01	MHC Binding	Negative	purified MHC/direct/fluorescence	qualitative binding	49
GQTGVIADY	HLA-B15:01	MHC Binding	Positive	purified MHC/direct/fluorescence	qualitative binding	0.05
GQTGVIADY	HLA-B15:01	MHC Binding	Positive-Intermediate	purified MHC/direct/fluorescence	dissociation constant KD (~EC50)	0.05
GQTGVIADY	HLA-B15:01	MHC Binding	Positive-High	purified MHC/direct/radioactivity	half life	0.05
GQTGVIADY	HLA-B27:05	MHC Binding	Positive-Low	purified MHC/direct/fluorescence	dissociation constant KD (~EC50)	1.7
GQTGVIADY	HLA-B40:01	MHC Binding	Negative	purified MHC/direct/fluorescence	qualitative binding	12
GQTGVIADY	HLA-B58:01	MHC Binding	Negative	purified MHC/direct/fluorescence	qualitative binding	12
GRLQSLQTY	HLA-A01:01	MHC Binding	Negative	purified MHC/direct/fluorescence	qualitative binding	17
GRLQSLQTY	HLA-A02:01	MHC Binding	Negative	purified MHC/direct/fluorescence	qualitative binding	14
GRLQSLQTY	HLA-A03:01	MHC Binding	Negative	purified MHC/direct/fluorescence	qualitative binding	5.5
GRLQSLQTY	HLA-A11:01	MHC Binding	Negative	purified MHC/direct/fluorescence	dissociation constant KD (~EC50)	6.5
GRLQSLQTY	HLA-A26:01	MHC Binding	Negative	purified MHC/direct/fluorescence	qualitative binding	12
GRLQSLQTY	HLA-A31:01	MHC Binding	Negative	purified MHC/direct/fluorescence	qualitative binding	15
GRLQSLQTY	HLA-B07:02	MHC Binding	Negative	purified MHC/direct/fluorescence	qualitative binding	26
GRLQSLQTY	HLA-B08:01	MHC Binding	Negative	purified MHC/direct/fluorescence	qualitative binding	28
GRLQSLQTY	HLA-B15:01	MHC Binding	Negative	purified MHC/direct/fluorescence	qualitative binding	1
GRLQSLQTY	HLA-B27:05	MHC Binding	Positive-Intermediate	purified MHC/direct/fluorescence	dissociation constant KD (~EC50)	0.01
GRLQSLQTY	HLA-B40:01	MHC Binding	Negative	purified MHC/direct/fluorescence	qualitative binding	7
GRLQSLQTY	HLA-B58:01	MHC Binding	Negative	purified MHC/direct/fluorescence	qualitative binding	5
GSFCTQLNR	HLA-A03:01	MHC Binding	Positive-Low	purified MHC/competitive/radioactivity	dissociation constant KD (~IC50)	3
GSFCTQLNR	HLA-A11:01	MHC Binding	Positive-Intermediate	purified MHC/competitive/radioactivity	dissociation constant KD (~IC50)	0.09
GSFCTQLNR	HLA-A31:01	MHC Binding	Positive-Intermediate	purified MHC/competitive/radioactivity	dissociation constant KD (~IC50)	0.25
GSFCTQLNR	HLA-A68:01	MHC Binding	Positive-Intermediate	purified MHC/competitive/radioactivity	dissociation constant KD (~IC50)	0.4
GSITAQPVK	HLA-B58:01	MHC Binding	Negative	purified MHC	qualitative binding	5
GSITAQPVKI	HLA-B58:01	MHC Binding	Negative	purified MHC	qualitative binding	5.5
GTDSGFAAY	HLA-A01:01	MHC Binding	Positive-High	purified MHC/direct/radioactivity	half life	0.02
GTDSGFAAY	HLA-A01:01	MHC Binding	Positive	purified MHC/direct/fluorescence	qualitative binding	0.02
GTDSGFAAY	HLA-A01:01	MHC Binding	Positive-High	purified MHC/competitive/radioactivity	dissociation constant KD (~IC50)	0.02
GTDSGFAAY	HLA-A01:01	MHC Binding	Positive-High	purified MHC/direct/fluorescence	dissociation constant KD (~EC50)	0.02
GTDSGFAAY	HLA-A02:01	MHC Binding	Negative	purified MHC/direct/fluorescence	qualitative binding	12
GTDSGFAAY	HLA-A03:01	MHC Binding	Positive-Low	purified MHC/direct/fluorescence	dissociation constant KD (~EC50)	1
GTDSGFAAY	HLA-A03:01	MHC Binding	Negative	purified MHC/direct/fluorescence	qualitative binding	1
GTDSGFAAY	HLA-A11:01	MHC Binding	Positive-Intermediate	purified MHC/direct/fluorescence	dissociation constant KD (~EC50)	1
GTDSGFAAY	HLA-A11:01	MHC Binding	Positive-Low	purified MHC/direct/radioactivity	half life	1
GTDSGFAAY	HLA-A23:01	MHC Binding	Negative	purified MHC/competitive/radioactivity	dissociation constant KD (~IC50)	40
GTDSGFAAY	HLA-A24:02	MHC Binding	Negative	purified MHC/competitive/radioactivity	dissociation constant KD (~IC50)	30
GTDSGFAAY	HLA-A24:02	MHC Binding	Negative	purified MHC/direct/fluorescence	qualitative binding	30
GTDSGFAAY	HLA-A26:01	MHC Binding	Positive-Low	purified MHC/competitive/radioactivity	dissociation constant KD (~IC50)	0.9
GTDSGFAAY	HLA-A26:01	MHC Binding	Negative	purified MHC/direct/fluorescence	qualitative binding	0.9
GTDSGFAAY	HLA-A29:02	MHC Binding	Positive-Intermediate	purified MHC/competitive/radioactivity	dissociation constant KD (~IC50)	0.4
GTDSGFAAY	HLA-A30:02	MHC Binding	Positive-High	purified MHC/competitive/radioactivity	dissociation constant KD (~IC50)	0.15
GTDSGFAAY	HLA-A31:01	MHC Binding	Negative	purified MHC/direct/fluorescence	qualitative binding	6
GTDSGFAAY	HLA-B07:02	MHC Binding	Negative	purified MHC/direct/fluorescence	qualitative binding	17
GTDSGFAAY	HLA-B08:01	MHC Binding	Negative	purified MHC/direct/fluorescence	qualitative binding	55
GTDSGFAAY	HLA-B15:01	MHC Binding	Negative	purified MHC/direct/fluorescence	qualitative binding	1.9
GTDSGFAAY	HLA-B27:05	MHC Binding	Negative	purified MHC/direct/fluorescence	qualitative binding	6.5
GTDSGFAAY	HLA-B40:01	MHC Binding	Negative	purified MHC/direct/fluorescence	qualitative binding	9
GTDSGFAAY	HLA-B58:01	MHC Binding	Negative	purified MHC/direct/fluorescence	dissociation constant KD (~EC50)	1.2
GTDSGFAAY	HLA-B58:01	MHC Binding	Negative	purified MHC/direct/fluorescence	qualitative binding	1.2
GTGPEASLPY	HLA-A01:01	MHC Binding	Positive-Intermediate	purified MHC/competitive/radioactivity	dissociation constant KD (~IC50)	1.2
GTGPEASLPY	HLA-A23:01	MHC Binding	Negative	purified MHC/competitive/radioactivity	dissociation constant KD (~IC50)	50
GTGPEASLPY	HLA-A24:02	MHC Binding	Negative	purified MHC/competitive/radioactivity	dissociation constant KD (~IC50)	39
GTGPEASLPY	HLA-A26:01	MHC Binding	Positive-Intermediate	purified MHC/competitive/radioactivity	dissociation constant KD (~IC50)	5
GTGPEASLPY	HLA-A29:02	MHC Binding	Positive-Intermediate	purified MHC/competitive/radioactivity	dissociation constant KD (~IC50)	0.5
GTGPEASLPY	HLA-A30:02	MHC Binding	Positive-Low	purified MHC/competitive/radioactivity	dissociation constant KD (~IC50)	2
GTLSYDNLK	HLA-A01:01	MHC Binding	Negative	purified MHC/direct/fluorescence	qualitative binding	8
GTLSYDNLK	HLA-A02:01	MHC Binding	Negative	purified MHC/direct/fluorescence	qualitative binding	20
GTLSYDNLK	HLA-A03:01	MHC Binding	Positive-Intermediate	purified MHC/direct/fluorescence	dissociation constant KD (~EC50)	0.5
GTLSYDNLK	HLA-A11:01	MHC Binding	Positive-High	purified MHC/direct/fluorescence	dissociation constant KD (~EC50)	0.08
GTLSYDNLK	HLA-A11:01	MHC Binding	Positive-High	purified MHC/direct/radioactivity	half life	0.08
GTLSYDNLK	HLA-B07:02	MHC Binding	Negative	purified MHC/direct/fluorescence	qualitative binding	70
GTLSYDNLK	HLA-B15:01	MHC Binding	Negative	purified MHC/direct/fluorescence	qualitative binding	49
GTLSYDNLK	HLA-B40:01	MHC Binding	Negative	purified MHC/direct/fluorescence	qualitative binding	24
GTLSYDNLK	HLA-B58:01	MHC Binding	Negative	purified MHC/direct/fluorescence	qualitative binding	10
GTSAAAYFV	HLA-A02:01	MHC Binding	Positive-Intermediate	purified MHC/competitive/radioactivity	dissociation constant KD (~IC50)	5
GTSAAAYFV	HLA-A02:01	MHC Binding	Positive-Intermediate	purified MHC/competitive/radioactivity	half maximal inhibitory concentration (IC50)	5
GTSAAAYFV	HLA-A02:03	MHC Binding	Positive-Intermediate	purified MHC/competitive/radioactivity	dissociation constant KD (~IC50)	14
GTSAAAYFV	HLA-A02:03	MHC Binding	Positive-Intermediate	purified MHC/competitive/radioactivity	half maximal inhibitory concentration (IC50)	14
GTSAAAYFV	HLA-A68:02	MHC Binding	Positive-High	purified MHC/competitive/radioactivity	dissociation constant KD (~IC50)	0.5
GTSAAAYFV	HLA-A68:02	MHC Binding	Positive-High	purified MHC/competitive/radioactivity	half maximal inhibitory concentration (IC50)	0.5
GTSWFITQR	HLA-A03:01	MHC Binding	Positive-Intermediate	purified MHC/competitive/radioactivity	dissociation constant KD (~IC50)	0.7
GTSWFITQR	HLA-A11:01	MHC Binding	Positive-High	purified MHC/competitive/radioactivity	dissociation constant KD (~IC50)	0.01
GTSWFITQR	HLA-A31:01	MHC Binding	Positive-High	purified MHC/competitive/radioactivity	dissociation constant KD (~IC50)	0.02
GTSWFITQR	HLA-A68:01	MHC Binding	Positive-High	purified MHC/competitive/radioactivity	dissociation constant KD (~IC50)	0.02
GTTLPKGFY	HLA-A01:01	MHC Binding	Negative	purified MHC/competitive/radioactivity	dissociation constant KD (~IC50)	0.6
GTTLPKGFY	HLA-A23:01	MHC Binding	Negative	purified MHC/competitive/radioactivity	dissociation constant KD (~IC50)	65
GTTLPKGFY	HLA-A24:02	MHC Binding	Negative	purified MHC/competitive/radioactivity	dissociation constant KD (~IC50)	38
GTTLPKGFY	HLA-A26:01	MHC Binding	Positive-Low	purified MHC/competitive/radioactivity	dissociation constant KD (~IC50)	6.5
GTTLPKGFY	HLA-A29:02	MHC Binding	Positive-Intermediate	purified MHC/competitive/radioactivity	dissociation constant KD (~IC50)	0.6
GTTLPKGFY	HLA-A30:02	MHC Binding	Positive-High	purified MHC/competitive/radioactivity	dissociation constant KD (~IC50)	0.4
GVAMPNLYK	HLA-A03:01	MHC Binding	Positive-High	purified MHC/competitive/radioactivity	dissociation constant KD (~IC50)	0.02
GVAMPNLYK	HLA-A03:01	MHC Binding	Positive-Intermediate	purified MHC/direct/fluorescence	dissociation constant KD (~EC50)	0.02
GVAMPNLYK	HLA-A03:01	MHC Binding	Positive-High	purified MHC/direct/radioactivity	half life	0.02
GVAMPNLYK	HLA-A11:01	MHC Binding	Positive-High	purified MHC/direct/radioactivity	half life	0.03
GVAMPNLYK	HLA-A11:01	MHC Binding	Positive-High	purified MHC/competitive/radioactivity	dissociation constant KD (~IC50)	0.03
GVAMPNLYK	HLA-A11:01	MHC Binding	Positive-Intermediate	purified MHC/direct/fluorescence	dissociation constant KD (~EC50)	0.03
GVAMPNLYK	HLA-A31:01	MHC Binding	Positive-Low	purified MHC/competitive/radioactivity	dissociation constant KD (~IC50)	4.5
GVAMPNLYK	HLA-A68:01	MHC Binding	Positive-High	purified MHC/competitive/radioactivity	dissociation constant KD (~IC50)	0.9
GVIADYNYK	HLA-A03:01	MHC Binding	Positive-High	purified MHC/competitive/radioactivity	dissociation constant KD (~IC50)	0.25
GVIADYNYK	HLA-A11:01	MHC Binding	Positive-High	purified MHC/competitive/radioactivity	dissociation constant KD (~IC50)	0.02
GVIADYNYK	HLA-A31:01	MHC Binding	Positive-Intermediate	purified MHC/competitive/radioactivity	dissociation constant KD (~IC50)	3
GVIADYNYK	HLA-A68:01	MHC Binding	Positive-Intermediate	purified MHC/competitive/radioactivity	dissociation constant KD (~IC50)	1
GVVFLHVTY	HLA-A03:01	MHC Binding	Negative	purified MHC/competitive/radioactivity	dissociation constant KD (~IC50)	4.5
GVVFLHVTY	HLA-A11:01	MHC Binding	Positive-Low	purified MHC/competitive/radioactivity	dissociation constant KD (~IC50)	0.5
GVVFLHVTY	HLA-A31:01	MHC Binding	Negative	purified MHC/competitive/radioactivity	dissociation constant KD (~IC50)	7.5
GVVFLHVTY	HLA-A68:01	MHC Binding	Negative	purified MHC/competitive/radioactivity	dissociation constant KD (~IC50)	1.2
GVYDYLVST	HLA-A02:01	MHC Binding	Positive-Intermediate	purified MHC/competitive/radioactivity	half maximal inhibitory concentration (IC50)	0.8
GVYDYLVST	HLA-A02:03	MHC Binding	Positive-Intermediate	purified MHC/competitive/radioactivity	half maximal inhibitory concentration (IC50)	0.5
GVYDYLVST	HLA-A68:02	MHC Binding	Negative	cellular MHC/competitive/fluorescence	half maximal inhibitory concentration (IC50)	1.2
GVYYPDEIFR	HLA-A03:01	MHC Binding	Positive-Low	purified MHC/competitive/radioactivity	dissociation constant KD (~IC50)	0.6
GVYYPDEIFR	HLA-A11:01	MHC Binding	Positive-Intermediate	purified MHC/competitive/radioactivity	dissociation constant KD (~IC50)	0.03
GVYYPDEIFR	HLA-A31:01	MHC Binding	Positive-Intermediate	purified MHC/competitive/radioactivity	dissociation constant KD (~IC50)	0.6
GVYYPDEIFR	HLA-A68:01	MHC Binding	Positive-High	purified MHC/competitive/radioactivity	dissociation constant KD (~IC50)	0.5
GYLKPTTFM	HLA-A01:01	MHC Binding	Negative	purified MHC/competitive/radioactivity	dissociation constant KD (~IC50)	45
GYLKPTTFM	HLA-A23:01	MHC Binding	Positive-Low	purified MHC/competitive/radioactivity	dissociation constant KD (~IC50)	0.6
GYLKPTTFM	HLA-A24:02	MHC Binding	Negative	purified MHC/competitive/radioactivity	dissociation constant KD (~IC50)	0.7
GYLKPTTFM	HLA-A26:01	MHC Binding	Negative	purified MHC/competitive/radioactivity	dissociation constant KD (~IC50)	19
GYLKPTTFM	HLA-A29:02	MHC Binding	Positive-Low	purified MHC/competitive/radioactivity	dissociation constant KD (~IC50)	1.3
GYLKPTTFM	HLA-A30:02	MHC Binding	Negative	purified MHC/competitive/radioactivity	dissociation constant KD (~IC50)	7
GYLKPTTFML	HLA-A01:01	MHC Binding	Negative	purified MHC/competitive/radioactivity	dissociation constant KD (~IC50)	65
GYLKPTTFML	HLA-A23:01	MHC Binding	Positive-High	purified MHC/competitive/radioactivity	dissociation constant KD (~IC50)	0.15
GYLKPTTFML	HLA-A24:02	MHC Binding	Positive-Intermediate	purified MHC/competitive/radioactivity	dissociation constant KD (~IC50)	0.4
GYLKPTTFML	HLA-A26:01	MHC Binding	Negative	purified MHC/competitive/radioactivity	dissociation constant KD (~IC50)	45
GYLKPTTFML	HLA-A29:02	MHC Binding	Positive-Low	purified MHC/competitive/radioactivity	dissociation constant KD (~IC50)	8.5
GYLKPTTFML	HLA-A30:02	MHC Binding	Negative	purified MHC/competitive/radioactivity	dissociation constant KD (~IC50)	27
GYQPYRVVVL	HLA-A01:01	MHC Binding	Negative	purified MHC/competitive/radioactivity	dissociation constant KD (~IC50)	45
GYQPYRVVVL	HLA-A23:01	MHC Binding	Positive-Intermediate	purified MHC/competitive/radioactivity	dissociation constant KD (~IC50)	0.7
GYQPYRVVVL	HLA-A24:02	MHC Binding	Positive-Intermediate	purified MHC/competitive/radioactivity	dissociation constant KD (~IC50)	0.4
GYQPYRVVVL	HLA-A26:01	MHC Binding	Negative	purified MHC/competitive/radioactivity	dissociation constant KD (~IC50)	35
GYQPYRVVVL	HLA-A29:02	MHC Binding	Positive-Low	purified MHC/competitive/radioactivity	dissociation constant KD (~IC50)	30
GYQPYRVVVL	HLA-A30:02	MHC Binding	Negative	purified MHC/competitive/radioactivity	dissociation constant KD (~IC50)	14
HADQLTPAW	HLA-A01:01	MHC Binding	Negative	purified MHC/direct/fluorescence	qualitative binding	5
HADQLTPAW	HLA-A02:01	MHC Binding	Negative	purified MHC/direct/fluorescence	qualitative binding	17
HADQLTPAW	HLA-A03:01	MHC Binding	Negative	purified MHC/direct/fluorescence	qualitative binding	28
HADQLTPAW	HLA-A11:01	MHC Binding	Negative	purified MHC/direct/fluorescence	dissociation constant KD (~EC50)	22
HADQLTPAW	HLA-A24:02	MHC Binding	Negative	purified MHC/direct/fluorescence	qualitative binding	12
HADQLTPAW	HLA-A26:01	MHC Binding	Negative	purified MHC/direct/fluorescence	qualitative binding	14
HADQLTPAW	HLA-A31:01	MHC Binding	Negative	purified MHC/direct/fluorescence	qualitative binding	32
HADQLTPAW	HLA-B07:02	MHC Binding	Negative	purified MHC/direct/fluorescence	dissociation constant KD (~EC50)	8.5
HADQLTPAW	HLA-B07:02	MHC Binding	Negative	purified MHC/direct/fluorescence	qualitative binding	8.5
HADQLTPAW	HLA-B08:01	MHC Binding	Negative	purified MHC/direct/fluorescence	qualitative binding	34
HADQLTPAW	HLA-B15:01	MHC Binding	Negative	purified MHC/direct/fluorescence	qualitative binding	32
HADQLTPAW	HLA-B27:05	MHC Binding	Negative	purified MHC/direct/fluorescence	qualitative binding	36
HADQLTPAW	HLA-B35:01	MHC Binding	Positive-Low	purified MHC/direct/radioactivity	half life	0.5
HADQLTPAW	HLA-B40:01	MHC Binding	Negative	purified MHC/direct/fluorescence	qualitative binding	9.5
HADQLTPAW	HLA-B58:01	MHC Binding	Positive	purified MHC/direct/fluorescence	qualitative binding	0.125
HADQLTPAW	HLA-B58:01	MHC Binding	Positive-High	purified MHC/direct/fluorescence	dissociation constant KD (~EC50)	0.125
HAFLCLFLL	HLA-A02:01	MHC Binding	Positive-High	purified MHC/competitive/radioactivity	half maximal inhibitory concentration (IC50)	8.5
HAFLCLFLL	HLA-A02:03	MHC Binding	Positive-High	purified MHC/competitive/radioactivity	half maximal inhibitory concentration (IC50)	8
HAFLCLFLL	HLA-A68:02	MHC Binding	Positive-High	purified MHC/competitive/radioactivity	half maximal inhibitory concentration (IC50)	0.5
HEGHQTAAF	HLA-B18:01	MHC Binding	Positive-Low	purified MHC/competitive/radioactivity	dissociation constant KD (~IC50)	0.12
HEGHQTAAF	HLA-B40:01	MHC Binding	Positive-Low	purified MHC/competitive/radioactivity	dissociation constant KD (~IC50)	0.8
HEGHQTAAF	HLA-B40:02	MHC Binding	Positive-Low	purified MHC/competitive/radioactivity	dissociation constant KD (~IC50)	0.09
HEGHQTAAF	HLA-B44:02	MHC Binding	Positive-Low	purified MHC/competitive/radioactivity	dissociation constant KD (~IC50)	0.5
HEGHQTAAF	HLA-B44:03	MHC Binding	Positive-Low	purified MHC/competitive/radioactivity	dissociation constant KD (~IC50)	0.6
HEGHQTAAF	HLA-B45:01	MHC Binding	Negative	purified MHC/competitive/radioactivity	dissociation constant KD (~IC50)	1.3
HLDGEVLSL	HLA-A02:01	MHC Binding	Positive-Intermediate	purified MHC/competitive/radioactivity	half maximal inhibitory concentration (IC50)	0.04
HLDGEVLSL	HLA-A02:03	MHC Binding	Positive-Intermediate	purified MHC/competitive/radioactivity	half maximal inhibitory concentration (IC50)	0.17
HLDGEVLSL	HLA-A68:02	MHC Binding	Negative	cellular MHC/competitive/fluorescence	half maximal inhibitory concentration (IC50)	2.5
HLVDFQVTI	HLA-A02:01	MHC Binding	Positive-High	purified MHC/competitive/radioactivity	half maximal inhibitory concentration (IC50)	0.17
HLVDFQVTI	HLA-A02:01	MHC Binding	Positive-High	purified MHC/competitive/radioactivity	dissociation constant KD (~IC50)	0.17
HLVDFQVTI	HLA-A02:03	MHC Binding	Positive-High	purified MHC/competitive/radioactivity	dissociation constant KD (~IC50)	0.15
HLVDFQVTI	HLA-A02:03	MHC Binding	Positive-High	purified MHC/competitive/radioactivity	half maximal inhibitory concentration (IC50)	0.15
HLVDFQVTI	HLA-A68:02	MHC Binding	Positive-High	purified MHC/competitive/radioactivity	dissociation constant KD (~IC50)	0.07
HLVDFQVTI	HLA-A68:02	MHC Binding	Positive-High	purified MHC/competitive/radioactivity	half maximal inhibitory concentration (IC50)	0.07
HPLADNKFAL	HLA-B07:02	MHC Binding	Positive-Intermediate	purified MHC/competitive/radioactivity	dissociation constant KD (~IC50)	1.2
HPLADNKFAL	HLA-B35:01	MHC Binding	Positive-Intermediate	purified MHC/competitive/radioactivity	dissociation constant KD (~IC50)	0.4
HPLADNKFAL	HLA-B51:01	MHC Binding	Positive-Low	purified MHC/competitive/radioactivity	dissociation constant KD (~IC50)	6
HPLADNKFAL	HLA-B53:01	MHC Binding	Positive-Low	purified MHC/competitive/radioactivity	dissociation constant KD (~IC50)	4
HPLADNKFAL	HLA-B54:01	MHC Binding	Negative	purified MHC/competitive/radioactivity	dissociation constant KD (~IC50)	1.1
HPLSHFVNL	HLA-A01:01	MHC Binding	Negative	purified MHC/direct/fluorescence	qualitative binding	40
HPLSHFVNL	HLA-A02:01	MHC Binding	Negative	purified MHC/direct/fluorescence	qualitative binding	4.5
HPLSHFVNL	HLA-A03:01	MHC Binding	Negative	purified MHC/direct/fluorescence	qualitative binding	6
HPLSHFVNL	HLA-A11:01	MHC Binding	Negative	purified MHC/direct/fluorescence	dissociation constant KD (~EC50)	13
HPLSHFVNL	HLA-A24:02	MHC Binding	Negative	purified MHC/direct/fluorescence	qualitative binding	3.5
HPLSHFVNL	HLA-A26:01	MHC Binding	Negative	purified MHC/direct/fluorescence	qualitative binding	5
HPLSHFVNL	HLA-A31:01	MHC Binding	Negative	purified MHC/direct/fluorescence	qualitative binding	5.5
HPLSHFVNL	HLA-B07:02	MHC Binding	Negative	purified MHC/direct/fluorescence	qualitative binding	0.15
HPLSHFVNL	HLA-B07:02	MHC Binding	Positive-Low	purified MHC/direct/fluorescence	dissociation constant KD (~EC50)	0.15
HPLSHFVNL	HLA-B07:02	MHC Binding	Positive-Intermediate	purified MHC/direct/radioactivity	half life	0.15
HPLSHFVNL	HLA-B07:02	MHC Binding	Positive-High	purified MHC/competitive/radioactivity	dissociation constant KD (~IC50)	0.15
HPLSHFVNL	HLA-B08:01	MHC Binding	Positive-Low	purified MHC/direct/fluorescence	dissociation constant KD (~EC50)	0.5
HPLSHFVNL	HLA-B15:01	MHC Binding	Negative	purified MHC/direct/fluorescence	qualitative binding	18
HPLSHFVNL	HLA-B27:05	MHC Binding	Negative	purified MHC/direct/fluorescence	dissociation constant KD (~EC50)	4
HPLSHFVNL	HLA-B35:01	MHC Binding	Positive-High	purified MHC/direct/radioactivity	half life	0.15
HPLSHFVNL	HLA-B35:01	MHC Binding	Positive-Intermediate	purified MHC/competitive/radioactivity	dissociation constant KD (~IC50)	0.15
HPLSHFVNL	HLA-B40:01	MHC Binding	Negative	purified MHC/direct/fluorescence	qualitative binding	3.5
HPLSHFVNL	HLA-B51:01	MHC Binding	Positive-Intermediate	purified MHC/competitive/radioactivity	dissociation constant KD (~IC50)	0.3
HPLSHFVNL	HLA-B53:01	MHC Binding	Positive-High	purified MHC/competitive/radioactivity	dissociation constant KD (~IC50)	0.08
HPLSHFVNL	HLA-B54:01	MHC Binding	Positive-Low	purified MHC/competitive/radioactivity	dissociation constant KD (~IC50)	0.17
HPLSHFVNL	HLA-B58:01	MHC Binding	Negative	purified MHC/direct/fluorescence	qualitative binding	9.5
HQNSKKTTK	HLA-A03:01	MHC Binding	Positive-Low	purified MHC/competitive/radioactivity	dissociation constant KD (~IC50)	2.5
HQNSKKTTK	HLA-A11:01	MHC Binding	Positive-Low	purified MHC/competitive/radioactivity	dissociation constant KD (~IC50)	3
HQNSKKTTK	HLA-A31:01	MHC Binding	Positive-Low	purified MHC/competitive/radioactivity	dissociation constant KD (~IC50)	2.5
HQNSKKTTK	HLA-A68:01	MHC Binding	Negative	purified MHC/competitive/radioactivity	dissociation constant KD (~IC50)	5.5
HTLESPVEF	HLA-A01:01	MHC Binding	Negative	purified MHC/direct/fluorescence	qualitative binding	4.5
HTLESPVEF	HLA-A02:01	MHC Binding	Negative	purified MHC/direct/fluorescence	qualitative binding	4
HTLESPVEF	HLA-A03:01	MHC Binding	Negative	purified MHC/direct/fluorescence	qualitative binding	1.1
HTLESPVEF	HLA-A11:01	MHC Binding	Negative	purified MHC/direct/fluorescence	dissociation constant KD (~EC50)	1.4
HTLESPVEF	HLA-A24:02	MHC Binding	Negative	purified MHC/direct/fluorescence	qualitative binding	0.6
HTLESPVEF	HLA-A26:01	MHC Binding	Negative	purified MHC/direct/fluorescence	qualitative binding	0.5
HTLESPVEF	HLA-A31:01	MHC Binding	Positive-Low	purified MHC/direct/fluorescence	dissociation constant KD (~EC50)	2.5
HTLESPVEF	HLA-B07:02	MHC Binding	Negative	purified MHC/direct/fluorescence	qualitative binding	9.5
HTLESPVEF	HLA-B08:01	MHC Binding	Negative	purified MHC/direct/fluorescence	qualitative binding	2.5
HTLESPVEF	HLA-B15:01	MHC Binding	Negative	purified MHC/direct/fluorescence	qualitative binding	0.7
HTLESPVEF	HLA-B15:01	MHC Binding	Positive-Low	purified MHC/direct/fluorescence	dissociation constant KD (~EC50)	0.7
HTLESPVEF	HLA-B27:05	MHC Binding	Negative	purified MHC/direct/fluorescence	qualitative binding	2.5
HTLESPVEF	HLA-B35:01	MHC Binding	Positive-Low	purified MHC/direct/radioactivity	half life	0.4
HTLESPVEF	HLA-B40:01	MHC Binding	Negative	purified MHC/direct/fluorescence	qualitative binding	4
HTLESPVEF	HLA-B58:01	MHC Binding	Positive-Intermediate	purified MHC/direct/fluorescence	dissociation constant KD (~EC50)	0.15
HTLESPVEF	HLA-B58:01	MHC Binding	Positive	purified MHC/direct/fluorescence	qualitative binding	0.15
HTLESPVEF	HLA-C04:01	MHC Binding	Negative	purified MHC/direct/fluorescence	dissociation constant KD (~EC50)	0.3
HTSSMRGVY	HLA-A01:01	MHC Binding	Positive-Intermediate	purified MHC/competitive/radioactivity	dissociation constant KD (~IC50)	0.6
HTSSMRGVY	HLA-A23:01	MHC Binding	Negative	purified MHC/competitive/radioactivity	dissociation constant KD (~IC50)	38
HTSSMRGVY	HLA-A24:02	MHC Binding	Negative	purified MHC/competitive/radioactivity	dissociation constant KD (~IC50)	38
HTSSMRGVY	HLA-A26:01	MHC Binding	Positive-High	purified MHC/competitive/radioactivity	dissociation constant KD (~IC50)	0.5
HTSSMRGVY	HLA-A29:02	MHC Binding	Positive-High	purified MHC/competitive/radioactivity	dissociation constant KD (~IC50)	1.1
HTSSMRGVY	HLA-A30:02	MHC Binding	Positive-High	purified MHC/competitive/radioactivity	dissociation constant KD (~IC50)	0.07
HTSSMRGVYY	HLA-A01:01	MHC Binding	Positive-Intermediate	purified MHC/competitive/radioactivity	dissociation constant KD (~IC50)	0.3
HTSSMRGVYY	HLA-A23:01	MHC Binding	Negative	purified MHC/competitive/radioactivity	dissociation constant KD (~IC50)	40
HTSSMRGVYY	HLA-A24:02	MHC Binding	Negative	purified MHC/competitive/radioactivity	dissociation constant KD (~IC50)	41
HTSSMRGVYY	HLA-A26:01	MHC Binding	Positive-Intermediate	purified MHC/competitive/radioactivity	dissociation constant KD (~IC50)	0.4
HTSSMRGVYY	HLA-A29:02	MHC Binding	Positive-High	purified MHC/competitive/radioactivity	dissociation constant KD (~IC50)	0.7
HTSSMRGVYY	HLA-A30:02	MHC Binding	Positive-High	purified MHC/competitive/radioactivity	dissociation constant KD (~IC50)	0.7
IAACAMLLV	HLA-A02:01	MHC Binding	Positive-Low	purified MHC/competitive/radioactivity	half maximal inhibitory concentration (IC50)	5
IAACAMLLV	HLA-A02:03	MHC Binding	Positive-Intermediate	purified MHC/competitive/radioactivity	half maximal inhibitory concentration (IC50)	4
IAACAMLLV	HLA-A68:02	MHC Binding	Positive-Intermediate	purified MHC/competitive/radioactivity	half maximal inhibitory concentration (IC50)	3
IAMWLLLLSI	HLA-A02:01	MHC Binding	Positive-Intermediate	purified MHC/competitive/radioactivity	half maximal inhibitory concentration (IC50)	15
IAMWLLLLSI	HLA-A02:03	MHC Binding	Positive-Low	purified MHC/competitive/radioactivity	half maximal inhibitory concentration (IC50)	5.5
IAMWLLLLSI	HLA-A68:02	MHC Binding	Negative	cellular MHC/competitive/fluorescence	half maximal inhibitory concentration (IC50)	7
IDATSTGNY	HLA-A01:01	MHC Binding	Positive-Low	purified MHC/competitive/radioactivity	dissociation constant KD (~IC50)	2.5
IDATSTGNY	HLA-A23:01	MHC Binding	Negative	purified MHC/competitive/radioactivity	dissociation constant KD (~IC50)	28
IDATSTGNY	HLA-A24:02	MHC Binding	Negative	purified MHC/competitive/radioactivity	dissociation constant KD (~IC50)	16
IDATSTGNY	HLA-A26:01	MHC Binding	Positive-Low	purified MHC/competitive/radioactivity	dissociation constant KD (~IC50)	4
IDATSTGNY	HLA-A29:02	MHC Binding	Positive-Intermediate	purified MHC/competitive/radioactivity	dissociation constant KD (~IC50)	3
IDATSTGNY	HLA-A30:02	MHC Binding	Negative	purified MHC/competitive/radioactivity	dissociation constant KD (~IC50)	0.8
IDFYLCFLAF	HLA-B18:01	MHC Binding	Positive-Low	purified MHC/competitive/radioactivity	dissociation constant KD (~IC50)	1.1
IDFYLCFLAF	HLA-B40:01	MHC Binding	Positive-Low	purified MHC/competitive/radioactivity	dissociation constant KD (~IC50)	20
IDFYLCFLAF	HLA-B40:02	MHC Binding	Negative	purified MHC/competitive/radioactivity	dissociation constant KD (~IC50)	4.5
IDFYLCFLAF	HLA-B44:02	MHC Binding	Positive-Intermediate	purified MHC/competitive/radioactivity	dissociation constant KD (~IC50)	3.5
IDFYLCFLAF	HLA-B44:03	MHC Binding	Positive-Intermediate	purified MHC/competitive/radioactivity	dissociation constant KD (~IC50)	5.5
IDFYLCFLAF	HLA-B45:01	MHC Binding	Positive-Intermediate	purified MHC/competitive/radioactivity	dissociation constant KD (~IC50)	34
IENATFFIF	HLA-B18:01	MHC Binding	Positive-High	purified MHC/competitive/radioactivity	dissociation constant KD (~IC50)	0.03
IENATFFIF	HLA-B40:01	MHC Binding	Positive-High	purified MHC/competitive/radioactivity	dissociation constant KD (~IC50)	1
IENATFFIF	HLA-B40:02	MHC Binding	Positive-High	purified MHC/competitive/radioactivity	dissociation constant KD (~IC50)	0.7
IENATFFIF	HLA-B44:02	MHC Binding	Positive-High	purified MHC/competitive/radioactivity	dissociation constant KD (~IC50)	0.09
IENATFFIF	HLA-B44:03	MHC Binding	Positive-High	purified MHC/competitive/radioactivity	dissociation constant KD (~IC50)	0.3
IENATFFIF	HLA-B45:01	MHC Binding	Positive-Intermediate	purified MHC/competitive/radioactivity	dissociation constant KD (~IC50)	1.5
IFRSDTLYL	HLA-A01:01	MHC Binding	Negative	purified MHC/competitive/radioactivity	dissociation constant KD (~IC50)	11
IFRSDTLYL	HLA-A23:01	MHC Binding	Negative	purified MHC/competitive/radioactivity	dissociation constant KD (~IC50)	0.4
IFRSDTLYL	HLA-A24:02	MHC Binding	Negative	purified MHC/competitive/radioactivity	dissociation constant KD (~IC50)	0.5
IFRSDTLYL	HLA-A26:01	MHC Binding	Negative	purified MHC/competitive/radioactivity	dissociation constant KD (~IC50)	10
IFRSDTLYL	HLA-A29:02	MHC Binding	Negative	purified MHC/competitive/radioactivity	dissociation constant KD (~IC50)	5.5
IFRSDTLYL	HLA-A30:02	MHC Binding	Negative	purified MHC/competitive/radioactivity	dissociation constant KD (~IC50)	17
IGAGICASY	HLA-A01:01	MHC Binding	Negative	purified MHC/competitive/radioactivity	dissociation constant KD (~IC50)	8.5
IGAGICASY	HLA-A23:01	MHC Binding	Negative	purified MHC/competitive/radioactivity	dissociation constant KD (~IC50)	15
IGAGICASY	HLA-A24:02	MHC Binding	Negative	purified MHC/competitive/radioactivity	dissociation constant KD (~IC50)	16
IGAGICASY	HLA-A26:01	MHC Binding	Negative	purified MHC/competitive/radioactivity	dissociation constant KD (~IC50)	2.5
IGAGICASY	HLA-A29:02	MHC Binding	Positive-High	purified MHC/competitive/radioactivity	dissociation constant KD (~IC50)	0.8
IGAGICASY	HLA-A30:02	MHC Binding	Positive-High	purified MHC/competitive/radioactivity	dissociation constant KD (~IC50)	0.3
IGMEVTPSG	HLA-B40:01	MHC Binding	Negative	purified MHC	qualitative binding	37
IGMEVTPSGT	HLA-B40:01	MHC Binding	Negative	purified MHC	qualitative binding	55
IGMEVTPSGTW	HLA-B40:01	MHC Binding	Negative	purified MHC	qualitative binding	50
IGMEVTPSGTWLTYH	HLA-B40:01	MHC Binding	Positive	purified MHC	qualitative binding	85
IIFWFSLEI	HLA-A02:01	MHC Binding	Positive-High	purified MHC/competitive/radioactivity	half maximal inhibitory concentration (IC50)	2.5
IIFWFSLEI	HLA-A02:01	MHC Binding	Positive-High	purified MHC/competitive/radioactivity	dissociation constant KD (~IC50)	2.5
IIFWFSLEI	HLA-A02:03	MHC Binding	Positive-Intermediate	purified MHC/competitive/radioactivity	dissociation constant KD (~IC50)	0.7
IIFWFSLEI	HLA-A02:03	MHC Binding	Positive-Intermediate	purified MHC/competitive/radioactivity	half maximal inhibitory concentration (IC50)	0.7
IIFWFSLEI	HLA-A68:02	MHC Binding	Positive-Low	purified MHC/competitive/radioactivity	half maximal inhibitory concentration (IC50)	1.6
IIFWFSLEI	HLA-A68:02	MHC Binding	Positive-Low	purified MHC/competitive/radioactivity	dissociation constant KD (~IC50)	1.6
IIMRCWLCWK	HLA-A03:01	MHC Binding	Positive-High	purified MHC/competitive/radioactivity	dissociation constant KD (~IC50)	1.6
IIMRCWLCWK	HLA-A11:01	MHC Binding	Positive-High	purified MHC/competitive/radioactivity	dissociation constant KD (~IC50)	3.5
IIMRCWLCWK	HLA-A31:01	MHC Binding	Positive-High	purified MHC/competitive/radioactivity	dissociation constant KD (~IC50)	28
IIMRCWLCWK	HLA-A68:01	MHC Binding	Positive-High	purified MHC/competitive/radioactivity	dissociation constant KD (~IC50)	14
IITTDNTFV	HLA-A02:01	MHC Binding	Positive	cellular MHC/direct/fluorescence	qualitative binding	1.7
ILASFSAST	HLA-A02:01	MHC Binding	Positive-High	purified MHC/competitive/radioactivity	half maximal inhibitory concentration (IC50)	1.2
ILASFSAST	HLA-A02:03	MHC Binding	Positive-High	purified MHC/competitive/radioactivity	half maximal inhibitory concentration (IC50)	1.3
ILASFSAST	HLA-A68:02	MHC Binding	Positive-Low	purified MHC/competitive/radioactivity	half maximal inhibitory concentration (IC50)	8
ILCFTIKRK	HLA-A03:01	MHC Binding	Positive-Low	purified MHC/competitive/radioactivity	dissociation constant KD (~IC50)	0.8
ILCFTIKRK	HLA-A11:01	MHC Binding	Negative	purified MHC/competitive/radioactivity	dissociation constant KD (~IC50)	1.5
ILCFTIKRK	HLA-A31:01	MHC Binding	Negative	purified MHC/competitive/radioactivity	dissociation constant KD (~IC50)	18
ILCFTIKRK	HLA-A68:01	MHC Binding	Negative	purified MHC/competitive/radioactivity	dissociation constant KD (~IC50)	4.5
ILFLTLIVFT	HLA-A02:01	MHC Binding	Positive-High	purified MHC/competitive/radioactivity	half maximal inhibitory concentration (IC50)	2.5
ILFLTLIVFT	HLA-A02:01	MHC Binding	Positive-High	purified MHC/competitive/radioactivity	dissociation constant KD (~IC50)	2.5
ILFLTLIVFT	HLA-A02:03	MHC Binding	Positive-Low	purified MHC/competitive/radioactivity	dissociation constant KD (~IC50)	4.5
ILFLTLIVFT	HLA-A02:03	MHC Binding	Positive-Low	purified MHC/competitive/radioactivity	half maximal inhibitory concentration (IC50)	4.5
ILFLTLIVFT	HLA-A68:02	MHC Binding	Negative	cellular MHC/competitive/fluorescence	half maximal inhibitory concentration (IC50)	13
ILFLTLIVFT	HLA-A68:02	MHC Binding	Negative	purified MHC/competitive/radioactivity	dissociation constant KD (~IC50)	13
ILGLPTQTV	HLA-A01:01	MHC Binding	Negative	purified MHC/direct/fluorescence	qualitative binding	14
ILGLPTQTV	HLA-A02:01	MHC Binding	Positive	purified MHC/direct/fluorescence	qualitative binding	0.4
ILGLPTQTV	HLA-A11:01	MHC Binding	Negative	purified MHC/direct/fluorescence	qualitative binding	29
ILGLPTQTV	HLA-A26:01	MHC Binding	Negative	purified MHC/direct/fluorescence	qualitative binding	25
ILGLPTQTV	HLA-B07:02	MHC Binding	Negative	purified MHC/direct/fluorescence	qualitative binding	6
ILGLPTQTV	HLA-B15:01	MHC Binding	Negative	purified MHC/direct/fluorescence	qualitative binding	2
ILGLPTQTV	HLA-B15:01	MHC Binding	Positive-Low	purified MHC/direct/fluorescence	dissociation constant KD (~EC50)	2
ILGLPTQTV	HLA-B40:01	MHC Binding	Negative	purified MHC/direct/fluorescence	qualitative binding	14
ILGTVSWNL	HLA-A01:01	MHC Binding	Negative	purified MHC/direct/fluorescence	qualitative binding	6
ILGTVSWNL	HLA-A02:01	MHC Binding	Positive	purified MHC/direct/fluorescence	qualitative binding	0.4
ILGTVSWNL	HLA-A02:01	MHC Binding	Positive-Intermediate	purified MHC/direct/fluorescence	dissociation constant KD (~EC50)	0.4
ILGTVSWNL	HLA-A02:01	MHC Binding	Positive-High	purified MHC/direct/radioactivity	half life	0.4
ILGTVSWNL	HLA-A03:01	MHC Binding	Negative	purified MHC/direct/fluorescence	qualitative binding	4.5
ILGTVSWNL	HLA-A11:01	MHC Binding	Negative	purified MHC/direct/fluorescence	qualitative binding	15
ILGTVSWNL	HLA-A24:02	MHC Binding	Negative	purified MHC/direct/fluorescence	qualitative binding	1
ILGTVSWNL	HLA-A26:01	MHC Binding	Negative	purified MHC/direct/fluorescence	qualitative binding	23
ILGTVSWNL	HLA-A31:01	MHC Binding	Negative	purified MHC/direct/fluorescence	qualitative binding	13
ILGTVSWNL	HLA-B07:02	MHC Binding	Negative	purified MHC/direct/fluorescence	qualitative binding	9.5
ILGTVSWNL	HLA-B08:01	MHC Binding	Negative	purified MHC/direct/fluorescence	qualitative binding	21
ILGTVSWNL	HLA-B15:01	MHC Binding	Negative	purified MHC/direct/fluorescence	qualitative binding	7.5
ILGTVSWNL	HLA-B27:05	MHC Binding	Negative	purified MHC/direct/fluorescence	qualitative binding	18
ILGTVSWNL	HLA-B40:01	MHC Binding	Negative	purified MHC/direct/fluorescence	qualitative binding	13
ILGTVSWNL	HLA-B58:01	MHC Binding	Negative	purified MHC/direct/fluorescence	qualitative binding	5.5
ILGTVSWNL	HLA-B58:01	MHC Binding	Positive-Low	purified MHC/direct/fluorescence	dissociation constant KD (~EC50)	5.5
ILHCANFNV	HLA-A01:01	MHC Binding	Negative	purified MHC/direct/fluorescence	qualitative binding	19
ILHCANFNV	HLA-A02:01	MHC Binding	Positive	purified MHC/direct/fluorescence	qualitative binding	0.4
ILHCANFNV	HLA-A02:01	MHC Binding	Positive-High	purified MHC/competitive/radioactivity	dissociation constant KD (~IC50)	0.4
ILHCANFNV	HLA-A02:01	MHC Binding	Positive-High	purified MHC/competitive/radioactivity	half maximal inhibitory concentration (IC50)	0.4
ILHCANFNV	HLA-A02:01	MHC Binding	Positive-Intermediate	purified MHC/direct/fluorescence	dissociation constant KD (~EC50)	0.4
ILHCANFNV	HLA-A02:01	MHC Binding	Positive-High	purified MHC/direct/radioactivity	half life	0.4
ILHCANFNV	HLA-A02:03	MHC Binding	Positive-High	purified MHC/competitive/radioactivity	dissociation constant KD (~IC50)	3
ILHCANFNV	HLA-A02:03	MHC Binding	Positive-High	purified MHC/competitive/radioactivity	half maximal inhibitory concentration (IC50)	3
ILHCANFNV	HLA-A03:01	MHC Binding	Negative	purified MHC/direct/fluorescence	dissociation constant KD (~EC50)	19
ILHCANFNV	HLA-A03:01	MHC Binding	Negative	purified MHC/direct/fluorescence	qualitative binding	19
ILHCANFNV	HLA-A11:01	MHC Binding	Negative	purified MHC/direct/fluorescence	qualitative binding	32
ILHCANFNV	HLA-A24:02	MHC Binding	Negative	purified MHC/direct/fluorescence	qualitative binding	18
ILHCANFNV	HLA-A26:01	MHC Binding	Negative	purified MHC/direct/fluorescence	qualitative binding	38
ILHCANFNV	HLA-A31:01	MHC Binding	Positive-Low	purified MHC/direct/fluorescence	dissociation constant KD (~EC50)	21
ILHCANFNV	HLA-A68:02	MHC Binding	Positive-Intermediate	purified MHC/competitive/radioactivity	half maximal inhibitory concentration (IC50)	11
ILHCANFNV	HLA-A68:02	MHC Binding	Positive-Intermediate	purified MHC/competitive/radioactivity	dissociation constant KD (~IC50)	11
ILHCANFNV	HLA-B07:02	MHC Binding	Negative	purified MHC/direct/fluorescence	qualitative binding	35
ILHCANFNV	HLA-B08:01	MHC Binding	Negative	purified MHC/direct/fluorescence	qualitative binding	33
ILHCANFNV	HLA-B15:01	MHC Binding	Negative	purified MHC/direct/fluorescence	qualitative binding	16
ILHCANFNV	HLA-B27:05	MHC Binding	Negative	purified MHC/direct/fluorescence	qualitative binding	24
ILHCANFNV	HLA-B40:01	MHC Binding	Negative	purified MHC/direct/fluorescence	qualitative binding	29
ILHCANFNV	HLA-B58:01	MHC Binding	Negative	purified MHC/direct/fluorescence	qualitative binding	32
ILLAPLLSA	HLA-A02:01	MHC Binding	Positive-High	purified MHC/competitive/radioactivity	half maximal inhibitory concentration (IC50)	0.2
ILLAPLLSA	HLA-A02:01	MHC Binding	Positive-High	purified MHC/competitive/radioactivity	dissociation constant KD (~IC50)	0.2
ILLAPLLSA	HLA-A02:03	MHC Binding	Positive-High	purified MHC/competitive/radioactivity	half maximal inhibitory concentration (IC50)	0.6
ILLAPLLSA	HLA-A02:03	MHC Binding	Positive-High	purified MHC/competitive/radioactivity	dissociation constant KD (~IC50)	0.6
ILLAPLLSA	HLA-A68:02	MHC Binding	Positive-Intermediate	purified MHC/competitive/radioactivity	half maximal inhibitory concentration (IC50)	21
ILLAPLLSA	HLA-A68:02	MHC Binding	Positive-Intermediate	purified MHC/competitive/radioactivity	dissociation constant KD (~IC50)	21
ILLCCMTSC	HLA-A02:01	MHC Binding	Positive	cellular MHC/direct/fluorescence	qualitative binding	3.5
ILLLDQVLV	HLA-A02:01	MHC Binding	Positive-High	purified MHC/competitive/radioactivity	half maximal inhibitory concentration (IC50)	0.1
ILLLDQVLV	HLA-A02:01	MHC Binding	Positive-High	purified MHC/competitive/radioactivity	dissociation constant KD (~IC50)	0.1
ILLLDQVLV	HLA-A02:03	MHC Binding	Positive-Intermediate	purified MHC/competitive/radioactivity	dissociation constant KD (~IC50)	3
ILLLDQVLV	HLA-A02:03	MHC Binding	Positive-Intermediate	purified MHC/competitive/radioactivity	half maximal inhibitory concentration (IC50)	3
ILLLDQVLV	HLA-A68:02	MHC Binding	Positive-Low	purified MHC/competitive/radioactivity	half maximal inhibitory concentration (IC50)	7
ILLLDQVLV	HLA-A68:02	MHC Binding	Positive-Low	purified MHC/competitive/radioactivity	dissociation constant KD (~IC50)	7
ILLNKHID	HLA-A02:01	T Cell	Positive-Low	ELISPOT	IFNg release	12
ILLNKHID	HLA-A02:01	MHC Binding	Positive-Low	cellular MHC/direct/fluorescence	qualitative binding	12
ILLNKHIDA	HLA-A02:01	T Cell	Positive	ELISPOT	IFNg release	0.7
ILLNKHIDA	HLA-A02:01	MHC Binding	Positive-Intermediate	cellular MHC/direct/fluorescence	qualitative binding	0.7
ILLNKHIDA	HLA-A02:01	MHC Binding	Positive	cellular MHC/direct/fluorescence	qualitative binding	0.7
ILLNKHIDA	HLA-A02:01	MHC Binding	Negative	cellular MHC/direct/fluorescence	qualitative binding	0.7
ILPDPLKPT	HLA-A02:01	T Cell	Positive	ELISA	IFNg release	1.5
ILPDPLKPT	HLA-A02:01	MHC Binding	Positive	cellular MHC/direct/fluorescence	qualitative binding	1.5
IMLIIFWFSL	HLA-A02:01	MHC Binding	Positive-Low	purified MHC/competitive/radioactivity	half maximal inhibitory concentration (IC50)	4.5
IMLIIFWFSL	HLA-A02:01	MHC Binding	Positive-Low	purified MHC/competitive/radioactivity	dissociation constant KD (~IC50)	4.5
IMLIIFWFSL	HLA-A02:03	MHC Binding	Negative	cellular MHC/competitive/fluorescence	half maximal inhibitory concentration (IC50)	18
IMLIIFWFSL	HLA-A02:03	MHC Binding	Negative	purified MHC/competitive/radioactivity	dissociation constant KD (~IC50)	18
IMLIIFWFSL	HLA-A68:02	MHC Binding	Negative	purified MHC/competitive/radioactivity	dissociation constant KD (~IC50)	17
IMLIIFWFSL	HLA-A68:02	MHC Binding	Negative	cellular MHC/competitive/fluorescence	half maximal inhibitory concentration (IC50)	17
IMQVFFGYFA	HLA-A02:01	MHC Binding	Positive-Intermediate	purified MHC/competitive/radioactivity	half maximal inhibitory concentration (IC50)	13
IMQVFFGYFA	HLA-A02:03	MHC Binding	Positive-Low	purified MHC/competitive/radioactivity	half maximal inhibitory concentration (IC50)	34
IMQVFFGYFA	HLA-A68:02	MHC Binding	Positive-Low	purified MHC/competitive/radioactivity	half maximal inhibitory concentration (IC50)	47
IPLQASLPF	HLA-B07:02	MHC Binding	Positive-High	purified MHC/competitive/radioactivity	dissociation constant KD (~IC50)	0.3
IPLQASLPF	HLA-B35:01	MHC Binding	Positive-High	purified MHC/competitive/radioactivity	dissociation constant KD (~IC50)	0.25
IPLQASLPF	HLA-B51:01	MHC Binding	Positive-Intermediate	purified MHC/competitive/radioactivity	dissociation constant KD (~IC50)	0.8
IPLQASLPF	HLA-B53:01	MHC Binding	Positive-Intermediate	purified MHC/competitive/radioactivity	dissociation constant KD (~IC50)	1.7
IPLQASLPF	HLA-B54:01	MHC Binding	Positive-Low	purified MHC/competitive/radioactivity	dissociation constant KD (~IC50)	0.8
IPRRNVATL	HLA-A02:01	MHC Binding	Positive-Low	purified MHC/direct/radioactivity	half life	14
IPRRNVATL	HLA-B07:02	MHC Binding	Positive-Intermediate	purified MHC/direct/radioactivity	half life	0.06
IPRRNVATL	HLA-B35:01	MHC Binding	Positive-Low	purified MHC/direct/radioactivity	half life	1
IPTNFSISI	HLA-B07:02	MHC Binding	Positive-Intermediate	purified MHC/competitive/radioactivity	dissociation constant KD (~IC50)	0.6
IPTNFSISI	HLA-B35:01	MHC Binding	Positive-High	purified MHC/competitive/radioactivity	dissociation constant KD (~IC50)	1.6
IPTNFSISI	HLA-B51:01	MHC Binding	Positive-Intermediate	purified MHC/competitive/radioactivity	dissociation constant KD (~IC50)	0.09
IPTNFSISI	HLA-B53:01	MHC Binding	Positive-High	purified MHC/competitive/radioactivity	dissociation constant KD (~IC50)	0.8
IPTNFSISI	HLA-B54:01	MHC Binding	Positive-High	purified MHC/competitive/radioactivity	dissociation constant KD (~IC50)	0.3
IQDLEEPCTK	HLA-A03:01	MHC Binding	Negative	purified MHC/competitive/radioactivity	dissociation constant KD (~IC50)	13
IQDLEEPCTK	HLA-A11:01	MHC Binding	Positive-Low	purified MHC/competitive/radioactivity	dissociation constant KD (~IC50)	6.5
IQDLEEPCTK	HLA-A31:01	MHC Binding	Negative	purified MHC/competitive/radioactivity	dissociation constant KD (~IC50)	38
IQDLEEPCTK	HLA-A68:01	MHC Binding	Negative	purified MHC/competitive/radioactivity	dissociation constant KD (~IC50)	31
IQFMMSRRR	HLA-A03:01	MHC Binding	Positive-Intermediate	purified MHC/competitive/radioactivity	dissociation constant KD (~IC50)	9
IQFMMSRRR	HLA-A11:01	MHC Binding	Positive-Intermediate	purified MHC/competitive/radioactivity	dissociation constant KD (~IC50)	6
IQFMMSRRR	HLA-A31:01	MHC Binding	Positive-High	purified MHC/competitive/radioactivity	dissociation constant KD (~IC50)	1.4
IQFMMSRRR	HLA-A68:01	MHC Binding	Positive-Low	purified MHC/competitive/radioactivity	dissociation constant KD (~IC50)	5
IQPGQTFSV	HLA-A02:01	MHC Binding	Positive-Intermediate	purified MHC/competitive/radioactivity	half maximal inhibitory concentration (IC50)	3
IQPGQTFSV	HLA-A02:03	MHC Binding	Positive-High	purified MHC/competitive/radioactivity	half maximal inhibitory concentration (IC50)	3.5
IQPGQTFSV	HLA-A68:02	MHC Binding	Positive-Low	purified MHC/competitive/radioactivity	half maximal inhibitory concentration (IC50)	8.5
ISDYDYYRY	HLA-A01:01	MHC Binding	Positive-High	purified MHC/competitive/radioactivity	dissociation constant KD (~IC50)	0.01
ISDYDYYRY	HLA-A01:01	MHC Binding	Positive	purified MHC/direct/fluorescence	qualitative binding	0.01
ISDYDYYRY	HLA-A01:01	MHC Binding	Positive-High	purified MHC/direct/radioactivity	half life	0.01
ISDYDYYRY	HLA-A02:01	MHC Binding	Negative	purified MHC/direct/fluorescence	qualitative binding	28
ISDYDYYRY	HLA-A03:01	MHC Binding	Negative	purified MHC/direct/fluorescence	qualitative binding	16
ISDYDYYRY	HLA-A23:01	MHC Binding	Negative	purified MHC/competitive/radioactivity	dissociation constant KD (~IC50)	19
ISDYDYYRY	HLA-A24:02	MHC Binding	Negative	purified MHC/competitive/radioactivity	dissociation constant KD (~IC50)	24
ISDYDYYRY	HLA-A24:02	MHC Binding	Negative	purified MHC/direct/fluorescence	qualitative binding	24
ISDYDYYRY	HLA-A26:01	MHC Binding	Negative	purified MHC/competitive/radioactivity	dissociation constant KD (~IC50)	11
ISDYDYYRY	HLA-A29:02	MHC Binding	Positive-Intermediate	purified MHC/competitive/radioactivity	dissociation constant KD (~IC50)	1.1
ISDYDYYRY	HLA-A30:02	MHC Binding	Positive-Intermediate	purified MHC/competitive/radioactivity	dissociation constant KD (~IC50)	0.4
ISDYDYYRY	HLA-B07:02	MHC Binding	Negative	purified MHC/direct/fluorescence	qualitative binding	65
ISDYDYYRY	HLA-B15:01	MHC Binding	Negative	purified MHC/direct/fluorescence	qualitative binding	4.5
ISDYDYYRY	HLA-B40:01	MHC Binding	Negative	purified MHC/direct/fluorescence	qualitative binding	26
ISDYDYYRY	HLA-B58:01	MHC Binding	Negative	purified MHC/direct/fluorescence	qualitative binding	0.08
ISTPKLKEDY	HLA-A01:01	MHC Binding	Negative	purified MHC/competitive/radioactivity	dissociation constant KD (~IC50)	2
ISTPKLKEDY	HLA-A23:01	MHC Binding	Negative	purified MHC/competitive/radioactivity	dissociation constant KD (~IC50)	26
ISTPKLKEDY	HLA-A24:02	MHC Binding	Negative	purified MHC/competitive/radioactivity	dissociation constant KD (~IC50)	29
ISTPKLKEDY	HLA-A26:01	MHC Binding	Negative	purified MHC/competitive/radioactivity	dissociation constant KD (~IC50)	11
ISTPKLKEDY	HLA-A29:02	MHC Binding	Negative	purified MHC/competitive/radioactivity	dissociation constant KD (~IC50)	3.5
ISTPKLKEDY	HLA-A30:02	MHC Binding	Positive-Low	purified MHC/competitive/radioactivity	dissociation constant KD (~IC50)	1.8
ITAIYVFCI	HLA-A02:01	MHC Binding	Positive-Intermediate	purified MHC/competitive/radioactivity	half maximal inhibitory concentration (IC50)	13
ITAIYVFCI	HLA-A02:03	MHC Binding	Positive-Intermediate	purified MHC/competitive/radioactivity	half maximal inhibitory concentration (IC50)	8.5
ITAIYVFCI	HLA-A68:02	MHC Binding	Positive-Intermediate	purified MHC/competitive/radioactivity	half maximal inhibitory concentration (IC50)	1.3
ITCVVIPSK	HLA-A01:01	MHC Binding	Negative	purified MHC/direct/fluorescence	qualitative binding	8.5
ITCVVIPSK	HLA-A02:01	MHC Binding	Negative	purified MHC/direct/fluorescence	qualitative binding	22
ITCVVIPSK	HLA-A03:01	MHC Binding	Positive-Low	purified MHC/direct/fluorescence	dissociation constant KD (~EC50)	0.5
ITCVVIPSK	HLA-A11:01	MHC Binding	Positive-High	purified MHC/direct/radioactivity	half life	0.25
ITCVVIPSK	HLA-A11:01	MHC Binding	Positive-Intermediate	purified MHC/direct/fluorescence	dissociation constant KD (~EC50)	0.25
ITCVVIPSK	HLA-B07:02	MHC Binding	Negative	purified MHC/direct/fluorescence	qualitative binding	24
ITCVVIPSK	HLA-B15:01	MHC Binding	Negative	purified MHC/direct/fluorescence	qualitative binding	31
ITCVVIPSK	HLA-B40:01	MHC Binding	Negative	purified MHC/direct/fluorescence	qualitative binding	42
ITCVVIPSK	HLA-B58:01	MHC Binding	Negative	purified MHC/direct/fluorescence	qualitative binding	5.5
ITMTTVYHI	HLA-A02:01	MHC Binding	Positive-High	purified MHC/competitive/radioactivity	dissociation constant KD (~IC50)	7
ITMTTVYHI	HLA-A02:01	MHC Binding	Positive-High	purified MHC/competitive/radioactivity	half maximal inhibitory concentration (IC50)	7
ITMTTVYHI	HLA-A02:03	MHC Binding	Positive-High	purified MHC/competitive/radioactivity	half maximal inhibitory concentration (IC50)	9
ITMTTVYHI	HLA-A02:03	MHC Binding	Positive-High	purified MHC/competitive/radioactivity	dissociation constant KD (~IC50)	9
ITMTTVYHI	HLA-A68:02	MHC Binding	Positive-High	purified MHC/competitive/radioactivity	half maximal inhibitory concentration (IC50)	2.5
ITMTTVYHI	HLA-A68:02	MHC Binding	Positive-High	purified MHC/competitive/radioactivity	dissociation constant KD (~IC50)	2.5
IVAALVFLI	HLA-A02:01	MHC Binding	Positive-High	purified MHC/competitive/radioactivity	half maximal inhibitory concentration (IC50)	3
IVAALVFLI	HLA-A02:01	MHC Binding	Positive-High	purified MHC/competitive/radioactivity	dissociation constant KD (~IC50)	3
IVAALVFLI	HLA-A02:03	MHC Binding	Positive-High	purified MHC/competitive/radioactivity	half maximal inhibitory concentration (IC50)	1.6
IVAALVFLI	HLA-A02:03	MHC Binding	Positive-High	purified MHC/competitive/radioactivity	dissociation constant KD (~IC50)	1.6
IVAALVFLI	HLA-A68:02	MHC Binding	Positive-High	purified MHC/competitive/radioactivity	half maximal inhibitory concentration (IC50)	0.09
IVAALVFLI	HLA-A68:02	MHC Binding	Positive-High	purified MHC/competitive/radioactivity	dissociation constant KD (~IC50)	0.09
IVDTVSALV	HLA-A02:01	MHC Binding	Positive-Intermediate	purified MHC/competitive/radioactivity	half maximal inhibitory concentration (IC50)	1.2
IVDTVSALV	HLA-A02:03	MHC Binding	Positive-Low	purified MHC/competitive/radioactivity	half maximal inhibitory concentration (IC50)	7
IVDTVSALV	HLA-A68:02	MHC Binding	Positive-Intermediate	purified MHC/competitive/radioactivity	half maximal inhibitory concentration (IC50)	0.9
IVNSVLLFL	HLA-A02:01	MHC Binding	Positive-Intermediate	purified MHC/competitive/radioactivity	dissociation constant KD (~IC50)	1.2
IVNSVLLFL	HLA-A02:01	MHC Binding	Positive-Intermediate	purified MHC/competitive/radioactivity	half maximal inhibitory concentration (IC50)	1.2
IVNSVLLFL	HLA-A02:03	MHC Binding	Positive-Intermediate	purified MHC/competitive/radioactivity	dissociation constant KD (~IC50)	0.8
IVNSVLLFL	HLA-A02:03	MHC Binding	Positive-Intermediate	purified MHC/competitive/radioactivity	half maximal inhibitory concentration (IC50)	0.8
IVNSVLLFL	HLA-A68:02	MHC Binding	Positive-Low	purified MHC/competitive/radioactivity	half maximal inhibitory concentration (IC50)	0.5
IVNSVLLFL	HLA-A68:02	MHC Binding	Positive-Low	purified MHC/competitive/radioactivity	dissociation constant KD (~IC50)	0.5
IVWVATEGA	HLA-A02:01	MHC Binding	Positive	cellular MHC/direct/fluorescence	qualitative binding	5.5
IYSTGNNVF	HLA-A01:01	MHC Binding	Negative	purified MHC/competitive/radioactivity	dissociation constant KD (~IC50)	17
IYSTGNNVF	HLA-A23:01	MHC Binding	Positive-Low	purified MHC/competitive/radioactivity	dissociation constant KD (~IC50)	0.02
IYSTGNNVF	HLA-A24:02	MHC Binding	Positive-Low	purified MHC/competitive/radioactivity	dissociation constant KD (~IC50)	0.01
IYSTGNNVF	HLA-A26:01	MHC Binding	Negative	purified MHC/competitive/radioactivity	dissociation constant KD (~IC50)	15
IYSTGNNVF	HLA-A29:02	MHC Binding	Positive-Low	purified MHC/competitive/radioactivity	dissociation constant KD (~IC50)	1.7
IYSTGNNVF	HLA-A30:02	MHC Binding	Negative	purified MHC/competitive/radioactivity	dissociation constant KD (~IC50)	4.5
KCYGVSATK	HLA-A01:01	MHC Binding	Negative	purified MHC/direct/fluorescence	qualitative binding	43
KCYGVSATK	HLA-A02:01	MHC Binding	Negative	purified MHC/direct/fluorescence	qualitative binding	14
KCYGVSATK	HLA-A03:01	MHC Binding	Negative	purified MHC/direct/radioactivity	half life	0.3
KCYGVSATK	HLA-A03:01	MHC Binding	Positive-Low	purified MHC/direct/fluorescence	dissociation constant KD (~EC50)	0.3
KCYGVSATK	HLA-A11:01	MHC Binding	Negative	purified MHC/direct/fluorescence	dissociation constant KD (~EC50)	0.8
KCYGVSATK	HLA-A11:01	MHC Binding	Positive-Low	purified MHC/direct/fluorescence	dissociation constant KD (~EC50)	0.8
KCYGVSATK	HLA-A24:02	MHC Binding	Negative	purified MHC/direct/fluorescence	qualitative binding	13
KCYGVSATK	HLA-A26:01	MHC Binding	Negative	purified MHC/direct/fluorescence	qualitative binding	19
KCYGVSATK	HLA-A31:01	MHC Binding	Positive-Low	purified MHC/direct/fluorescence	dissociation constant KD (~EC50)	3.5
KCYGVSATK	HLA-B07:02	MHC Binding	Negative	purified MHC/direct/fluorescence	qualitative binding	15
KCYGVSATK	HLA-B08:01	MHC Binding	Negative	purified MHC/direct/fluorescence	qualitative binding	60
KCYGVSATK	HLA-B15:01	MHC Binding	Negative	purified MHC/direct/fluorescence	qualitative binding	4.5
KCYGVSATK	HLA-B27:05	MHC Binding	Negative	purified MHC/direct/fluorescence	qualitative binding	1.3
KCYGVSATK	HLA-B40:01	MHC Binding	Negative	purified MHC/direct/fluorescence	qualitative binding	10
KCYGVSATK	HLA-B58:01	MHC Binding	Negative	purified MHC/direct/fluorescence	qualitative binding	2.5
KDYVVVHGYF	HLA-B18:01	MHC Binding	Negative	purified MHC/competitive/radioactivity	dissociation constant KD (~IC50)	20
KDYVVVHGYF	HLA-B40:01	MHC Binding	Negative	purified MHC/competitive/radioactivity	dissociation constant KD (~IC50)	26
KDYVVVHGYF	HLA-B40:02	MHC Binding	Negative	purified MHC/competitive/radioactivity	dissociation constant KD (~IC50)	24
KDYVVVHGYF	HLA-B44:02	MHC Binding	Positive-Intermediate	purified MHC/competitive/radioactivity	dissociation constant KD (~IC50)	12
KDYVVVHGYF	HLA-B44:03	MHC Binding	Positive-Intermediate	purified MHC/competitive/radioactivity	dissociation constant KD (~IC50)	18
KDYVVVHGYF	HLA-B45:01	MHC Binding	Positive-Low	purified MHC/competitive/radioactivity	dissociation constant KD (~IC50)	80
KEDYQIGGY	HLA-A01:01	MHC Binding	Negative	purified MHC/competitive/radioactivity	dissociation constant KD (~IC50)	0.6
KEDYQIGGY	HLA-A23:01	MHC Binding	Negative	purified MHC/competitive/radioactivity	dissociation constant KD (~IC50)	37
KEDYQIGGY	HLA-A24:02	MHC Binding	Negative	purified MHC/competitive/radioactivity	dissociation constant KD (~IC50)	48
KEDYQIGGY	HLA-A26:01	MHC Binding	Negative	purified MHC/competitive/radioactivity	dissociation constant KD (~IC50)	13
KEDYQIGGY	HLA-A29:02	MHC Binding	Negative	purified MHC/competitive/radioactivity	dissociation constant KD (~IC50)	4.5
KEDYQIGGY	HLA-A30:02	MHC Binding	Positive-Intermediate	purified MHC/competitive/radioactivity	dissociation constant KD (~IC50)	0.3
KEGIVWVAT	HLA-B18:01	MHC Binding	Negative	purified MHC/competitive/radioactivity	dissociation constant KD (~IC50)	7.5
KEGIVWVAT	HLA-B40:01	MHC Binding	Negative	purified MHC/competitive/radioactivity	dissociation constant KD (~IC50)	1.5
KEGIVWVAT	HLA-B40:02	MHC Binding	Positive-High	purified MHC/competitive/radioactivity	dissociation constant KD (~IC50)	0.7
KEGIVWVAT	HLA-B44:02	MHC Binding	Negative	purified MHC/competitive/radioactivity	dissociation constant KD (~IC50)	4
KEGIVWVAT	HLA-B44:03	MHC Binding	Negative	purified MHC/competitive/radioactivity	dissociation constant KD (~IC50)	5.5
KEGIVWVAT	HLA-B45:01	MHC Binding	Positive-Intermediate	purified MHC/competitive/radioactivity	dissociation constant KD (~IC50)	0.7
KELSPRWYF	HLA-B18:01	MHC Binding	Positive-Low	purified MHC/competitive/radioactivity	dissociation constant KD (~IC50)	0.7
KELSPRWYF	HLA-B40:01	MHC Binding	Positive-Low	purified MHC/competitive/radioactivity	dissociation constant KD (~IC50)	0.3
KELSPRWYF	HLA-B40:02	MHC Binding	Positive-High	purified MHC/competitive/radioactivity	dissociation constant KD (~IC50)	1.2
KELSPRWYF	HLA-B44:02	MHC Binding	Positive-Intermediate	purified MHC/competitive/radioactivity	dissociation constant KD (~IC50)	0.15
KELSPRWYF	HLA-B44:03	MHC Binding	Positive-Intermediate	purified MHC/competitive/radioactivity	dissociation constant KD (~IC50)	0.12
KELSPRWYF	HLA-B45:01	MHC Binding	Negative	purified MHC/competitive/radioactivity	dissociation constant KD (~IC50)	2.5
KELSPRWYFY	HLA-B18:01	MHC Binding	Negative	purified MHC/competitive/radioactivity	dissociation constant KD (~IC50)	3.5
KELSPRWYFY	HLA-B40:01	MHC Binding	Negative	purified MHC/competitive/radioactivity	dissociation constant KD (~IC50)	1.7
KELSPRWYFY	HLA-B40:02	MHC Binding	Positive-Intermediate	purified MHC/competitive/radioactivity	dissociation constant KD (~IC50)	11
KELSPRWYFY	HLA-B44:02	MHC Binding	Positive-High	purified MHC/competitive/radioactivity	dissociation constant KD (~IC50)	0.8
KELSPRWYFY	HLA-B44:03	MHC Binding	Positive-High	purified MHC/competitive/radioactivity	dissociation constant KD (~IC50)	0.8
KELSPRWYFY	HLA-B45:01	MHC Binding	Positive-Low	purified MHC/competitive/radioactivity	dissociation constant KD (~IC50)	6
KEPCPSGTY	HLA-A01:01	MHC Binding	Negative	purified MHC/direct/fluorescence	qualitative binding	18
KEPCPSGTY	HLA-A02:01	MHC Binding	Negative	purified MHC/direct/fluorescence	qualitative binding	55
KEPCPSGTY	HLA-A03:01	MHC Binding	Negative	purified MHC/direct/fluorescence	qualitative binding	12
KEPCPSGTY	HLA-A24:02	MHC Binding	Negative	purified MHC/direct/fluorescence	qualitative binding	14
KEPCPSGTY	HLA-B07:02	MHC Binding	Negative	purified MHC/direct/fluorescence	qualitative binding	22
KEPCPSGTY	HLA-B15:01	MHC Binding	Positive	purified MHC/direct/fluorescence	qualitative binding	0.4
KEPCPSGTY	HLA-B40:01	MHC Binding	Negative	purified MHC/direct/fluorescence	qualitative binding	1.1
KEPCPSGTY	HLA-B58:01	MHC Binding	Negative	purified MHC/direct/fluorescence	qualitative binding	7.5
KFTTSLSLHK	HLA-A03:01	MHC Binding	Positive-Intermediate	purified MHC/competitive/radioactivity	dissociation constant KD (~IC50)	4.5
KFTTSLSLHK	HLA-A11:01	MHC Binding	Positive-Intermediate	purified MHC/competitive/radioactivity	dissociation constant KD (~IC50)	5
KFTTSLSLHK	HLA-A31:01	MHC Binding	Positive-Intermediate	purified MHC/competitive/radioactivity	dissociation constant KD (~IC50)	15
KFTTSLSLHK	HLA-A68:01	MHC Binding	Positive-Intermediate	purified MHC/competitive/radioactivity	dissociation constant KD (~IC50)	28
KIILFLTLI	HLA-A02:01	MHC Binding	Positive-Intermediate	purified MHC/competitive/radioactivity	dissociation constant KD (~IC50)	3.5
KIILFLTLI	HLA-A02:01	MHC Binding	Positive-Intermediate	purified MHC/competitive/radioactivity	half maximal inhibitory concentration (IC50)	3.5
KIILFLTLI	HLA-A02:03	MHC Binding	Positive-High	purified MHC/competitive/radioactivity	dissociation constant KD (~IC50)	0.6
KIILFLTLI	HLA-A02:03	MHC Binding	Positive-High	purified MHC/competitive/radioactivity	half maximal inhibitory concentration (IC50)	0.6
KIILFLTLI	HLA-A68:02	MHC Binding	Positive-Intermediate	purified MHC/competitive/radioactivity	half maximal inhibitory concentration (IC50)	3.5
KIILFLTLI	HLA-A68:02	MHC Binding	Positive-Intermediate	purified MHC/competitive/radioactivity	dissociation constant KD (~IC50)	3.5
KISNCVADY	HLA-A01:01	MHC Binding	Negative	purified MHC/competitive/radioactivity	dissociation constant KD (~IC50)	5.5
KISNCVADY	HLA-A23:01	MHC Binding	Negative	purified MHC/competitive/radioactivity	dissociation constant KD (~IC50)	23
KISNCVADY	HLA-A24:02	MHC Binding	Negative	purified MHC/competitive/radioactivity	dissociation constant KD (~IC50)	28
KISNCVADY	HLA-A26:01	MHC Binding	Negative	purified MHC/competitive/radioactivity	dissociation constant KD (~IC50)	4
KISNCVADY	HLA-A29:02	MHC Binding	Positive-Intermediate	purified MHC/competitive/radioactivity	dissociation constant KD (~IC50)	1.1
KISNCVADY	HLA-A30:02	MHC Binding	Positive-High	purified MHC/competitive/radioactivity	dissociation constant KD (~IC50)	0.05
KLFAAETLK	HLA-A02:01	MHC Binding	Negative	purified MHC/direct/fluorescence	qualitative binding	2.5
KLFAAETLK	HLA-A11:01	MHC Binding	Positive-High	purified MHC/competitive/radioactivity	dissociation constant KD (~IC50)	0.5
KLFAAETLK	HLA-A11:01	MHC Binding	Positive-High	purified MHC/direct/radioactivity	half life	0.5
KLFAAETLK	HLA-A11:01	MHC Binding	Positive-Intermediate	purified MHC/direct/fluorescence	dissociation constant KD (~EC50)	0.5
KLFAAETLK	HLA-A68:01	MHC Binding	Positive-Intermediate	purified MHC/competitive/radioactivity	dissociation constant KD (~IC50)	3.5
KLFAAETLK	HLA-B15:01	MHC Binding	Negative	purified MHC/direct/fluorescence	qualitative binding	8
KLFAAETLK	HLA-B58:01	MHC Binding	Negative	purified MHC/direct/fluorescence	qualitative binding	9.5
KLFIRQEEV	HLA-A01:01	MHC Binding	Negative	purified MHC/direct/fluorescence	qualitative binding	16
KLFIRQEEV	HLA-A02:01	MHC Binding	Positive-Intermediate	purified MHC/direct/fluorescence	dissociation constant KD (~EC50)	0.1
KLFIRQEEV	HLA-A02:01	MHC Binding	Positive-Intermediate	purified MHC/direct/radioactivity	half life	0.1
KLFIRQEEV	HLA-A02:01	MHC Binding	Positive	purified MHC/direct/fluorescence	qualitative binding	0.1
KLFIRQEEV	HLA-A03:01	MHC Binding	Negative	purified MHC/direct/fluorescence	qualitative binding	5
KLFIRQEEV	HLA-A11:01	MHC Binding	Negative	purified MHC/direct/fluorescence	qualitative binding	31
KLFIRQEEV	HLA-A24:02	MHC Binding	Negative	purified MHC/direct/fluorescence	qualitative binding	14
KLFIRQEEV	HLA-A26:01	MHC Binding	Negative	purified MHC/direct/fluorescence	qualitative binding	21
KLFIRQEEV	HLA-A31:01	MHC Binding	Positive-Intermediate	purified MHC/direct/fluorescence	dissociation constant KD (~EC50)	7.5
KLFIRQEEV	HLA-B07:02	MHC Binding	Negative	purified MHC/direct/fluorescence	qualitative binding	18
KLFIRQEEV	HLA-B08:01	MHC Binding	Positive-Low	purified MHC/direct/fluorescence	dissociation constant KD (~EC50)	0.5
KLFIRQEEV	HLA-B15:01	MHC Binding	Negative	purified MHC/direct/fluorescence	dissociation constant KD (~EC50)	1.4
KLFIRQEEV	HLA-B15:01	MHC Binding	Negative	purified MHC/direct/fluorescence	qualitative binding	1.4
KLFIRQEEV	HLA-B27:05	MHC Binding	Negative	purified MHC/direct/fluorescence	qualitative binding	18
KLFIRQEEV	HLA-B40:01	MHC Binding	Negative	purified MHC/direct/fluorescence	qualitative binding	8
KLFIRQEEV	HLA-B58:01	MHC Binding	Negative	purified MHC/direct/fluorescence	qualitative binding	8.5
KLFTIAMWL	HLA-A02:01	MHC Binding	Positive-High	purified MHC/competitive/radioactivity	half maximal inhibitory concentration (IC50)	0.3
KLFTIAMWL	HLA-A02:03	MHC Binding	Positive-High	purified MHC/competitive/radioactivity	half maximal inhibitory concentration (IC50)	0.6
KLFTIAMWL	HLA-A68:02	MHC Binding	Positive-Intermediate	purified MHC/competitive/radioactivity	half maximal inhibitory concentration (IC50)	4
KLFTIAMWLL	HLA-A02:01	MHC Binding	Positive-High	purified MHC/competitive/radioactivity	half maximal inhibitory concentration (IC50)	0.4
KLFTIAMWLL	HLA-A02:03	MHC Binding	Positive-Low	purified MHC/competitive/radioactivity	half maximal inhibitory concentration (IC50)	1.1
KLFTIAMWLL	HLA-A68:02	MHC Binding	Negative	cellular MHC/competitive/fluorescence	half maximal inhibitory concentration (IC50)	5.5
KLIEYSDFA	HLA-A02:01	MHC Binding	Positive-High	purified MHC/competitive/radioactivity	half maximal inhibitory concentration (IC50)	0.25
KLIEYSDFA	HLA-A02:03	MHC Binding	Positive-High	purified MHC/competitive/radioactivity	half maximal inhibitory concentration (IC50)	1.2
KLIEYSDFA	HLA-A68:02	MHC Binding	Positive-High	purified MHC/competitive/radioactivity	half maximal inhibitory concentration (IC50)	19
KLLIVLTCI	HLA-A02:01	MHC Binding	Positive-Intermediate	purified MHC/competitive/radioactivity	dissociation constant KD (~IC50)	0.6
KLLIVLTCI	HLA-A02:01	MHC Binding	Positive-Intermediate	purified MHC/competitive/radioactivity	half maximal inhibitory concentration (IC50)	0.6
KLLIVLTCI	HLA-A02:03	MHC Binding	Positive-Low	purified MHC/competitive/radioactivity	dissociation constant KD (~IC50)	1.2
KLLIVLTCI	HLA-A02:03	MHC Binding	Positive-Low	purified MHC/competitive/radioactivity	half maximal inhibitory concentration (IC50)	1.2
KLLIVLTCI	HLA-A68:02	MHC Binding	Negative	purified MHC/competitive/radioactivity	dissociation constant KD (~IC50)	25
KLLIVLTCI	HLA-A68:02	MHC Binding	Negative	cellular MHC/competitive/fluorescence	half maximal inhibitory concentration (IC50)	25
KLLQTLVLK	HLA-A03:01	MHC Binding	Positive-Low	purified MHC/competitive/radioactivity	dissociation constant KD (~IC50)	0.01
KLLQTLVLK	HLA-A11:01	MHC Binding	Positive-Low	purified MHC/competitive/radioactivity	dissociation constant KD (~IC50)	0.175
KLLQTLVLK	HLA-A31:01	MHC Binding	Positive-Low	purified MHC/competitive/radioactivity	dissociation constant KD (~IC50)	0.6
KLLQTLVLK	HLA-A68:01	MHC Binding	Negative	purified MHC/competitive/radioactivity	dissociation constant KD (~IC50)	4.5
KLMGHFSWWT	HLA-A02:01	MHC Binding	Positive-High	purified MHC/competitive/radioactivity	half maximal inhibitory concentration (IC50)	3
KLMGHFSWWT	HLA-A02:03	MHC Binding	Positive-Intermediate	purified MHC/competitive/radioactivity	half maximal inhibitory concentration (IC50)	13
KLMGHFSWWT	HLA-A68:02	MHC Binding	Positive-Low	purified MHC/competitive/radioactivity	half maximal inhibitory concentration (IC50)	65
KLMPICMDV	HLA-A01:01	MHC Binding	Negative	purified MHC/direct/fluorescence	qualitative binding	19
KLMPICMDV	HLA-A02:01	MHC Binding	Positive-High	purified MHC/competitive/radioactivity	half maximal inhibitory concentration (IC50)	0.08
KLMPICMDV	HLA-A02:01	MHC Binding	Positive-Intermediate	purified MHC/direct/fluorescence	dissociation constant KD (~EC50)	0.08
KLMPICMDV	HLA-A02:01	MHC Binding	Positive-High	purified MHC/direct/radioactivity	half life	0.08
KLMPICMDV	HLA-A02:01	MHC Binding	Positive-High	purified MHC/competitive/radioactivity	dissociation constant KD (~IC50)	0.08
KLMPICMDV	HLA-A02:01	MHC Binding	Positive	purified MHC/direct/fluorescence	qualitative binding	0.08
KLMPICMDV	HLA-A02:03	MHC Binding	Positive-High	purified MHC/competitive/radioactivity	half maximal inhibitory concentration (IC50)	0.12
KLMPICMDV	HLA-A02:03	MHC Binding	Positive-High	purified MHC/competitive/radioactivity	dissociation constant KD (~IC50)	0.12
KLMPICMDV	HLA-A03:01	MHC Binding	Negative	purified MHC/direct/fluorescence	dissociation constant KD (~EC50)	6.5
KLMPICMDV	HLA-A03:01	MHC Binding	Negative	purified MHC/direct/fluorescence	qualitative binding	6.5
KLMPICMDV	HLA-A11:01	MHC Binding	Negative	purified MHC/direct/fluorescence	qualitative binding	25
KLMPICMDV	HLA-A24:02	MHC Binding	Negative	purified MHC/direct/fluorescence	qualitative binding	13
KLMPICMDV	HLA-A26:01	MHC Binding	Negative	purified MHC/direct/fluorescence	qualitative binding	14
KLMPICMDV	HLA-A31:01	MHC Binding	Negative	purified MHC/direct/fluorescence	qualitative binding	15
KLMPICMDV	HLA-A68:02	MHC Binding	Negative	purified MHC/competitive/radioactivity	dissociation constant KD (~IC50)	7
KLMPICMDV	HLA-A68:02	MHC Binding	Negative	cellular MHC/competitive/fluorescence	half maximal inhibitory concentration (IC50)	7
KLMPICMDV	HLA-B07:02	MHC Binding	Negative	purified MHC/direct/fluorescence	qualitative binding	17
KLMPICMDV	HLA-B07:02	MHC Binding	Negative	purified MHC/direct/fluorescence	dissociation constant KD (~EC50)	17
KLMPICMDV	HLA-B08:01	MHC Binding	Negative	purified MHC/direct/fluorescence	qualitative binding	13
KLMPICMDV	HLA-B15:01	MHC Binding	Positive-Low	purified MHC/direct/fluorescence	dissociation constant KD (~EC50)	6.5
KLMPICMDV	HLA-B15:01	MHC Binding	Negative	purified MHC/direct/fluorescence	qualitative binding	6.5
KLMPICMDV	HLA-B27:05	MHC Binding	Negative	purified MHC/direct/fluorescence	qualitative binding	34
KLMPICMDV	HLA-B40:01	MHC Binding	Negative	purified MHC/direct/fluorescence	qualitative binding	25
KLMPICMDV	HLA-B58:01	MHC Binding	Negative	purified MHC/direct/fluorescence	qualitative binding	20
KLNDLCFSNV	HLA-A02:01	MHC Binding	Positive	cellular MHC/competitive/fluorescence	qualitative binding	0.4
KLNDLCFSNV	HLA-A02:01	T Cell	Negative	ELISPOT	IFNg release	0.4
KLNDLCFSNV	HLA-A02:01	MHC Binding	Positive	purified MHC/direct/fluorescence	qualitative binding	0.4
KLNVGDYFV	HLA-A02:01	MHC Binding	Positive-High	purified MHC/competitive/radioactivity	half maximal inhibitory concentration (IC50)	0.25
KLNVGDYFV	HLA-A02:03	MHC Binding	Positive-High	purified MHC/competitive/radioactivity	half maximal inhibitory concentration (IC50)	2.5
KLNVGDYFV	HLA-A68:02	MHC Binding	Positive-Low	purified MHC/competitive/radioactivity	half maximal inhibitory concentration (IC50)	13
KLPDDFMGC	HLA-A02:01	MHC Binding	Positive	cellular MHC/direct/fluorescence	qualitative binding	1
KLPDDFMGCV	HLA-A02:01	T Cell	Positive	ELISPOT	IFNg release	1
KLPDDFMGCV	HLA-A02:01	T Cell	Positive	multimer/tetramer	qualitative binding	1
KLPDDFMGCV	HLA-A02:01	MHC Binding	Positive	purified MHC/direct/fluorescence	qualitative binding	1
KLPDDFMGCV	HLA-A02:01	MHC Binding	Positive	cellular MHC/competitive/fluorescence	qualitative binding	1
KLSYGIATV	HLA-A02:01	MHC Binding	Positive-High	purified MHC/competitive/radioactivity	half maximal inhibitory concentration (IC50)	0.05
KLSYGIATV	HLA-A02:03	MHC Binding	Positive-High	purified MHC/competitive/radioactivity	half maximal inhibitory concentration (IC50)	0.01
KLSYGIATV	HLA-A68:02	MHC Binding	Positive-Low	purified MHC/competitive/radioactivity	half maximal inhibitory concentration (IC50)	0.9
KLWAQCVQL	HLA-A01:01	MHC Binding	Negative	purified MHC/direct/fluorescence	qualitative binding	19
KLWAQCVQL	HLA-A02:01	MHC Binding	Positive-High	purified MHC/competitive/radioactivity	half maximal inhibitory concentration (IC50)	0.05
KLWAQCVQL	HLA-A02:01	MHC Binding	Positive-Intermediate	purified MHC/direct/fluorescence	dissociation constant KD (~EC50)	0.05
KLWAQCVQL	HLA-A02:01	MHC Binding	Positive-High	purified MHC/direct/radioactivity	half life	0.05
KLWAQCVQL	HLA-A02:01	MHC Binding	Positive	purified MHC/direct/fluorescence	qualitative binding	0.05
KLWAQCVQL	HLA-A02:01	MHC Binding	Positive-High	purified MHC/competitive/radioactivity	dissociation constant KD (~IC50)	0.05
KLWAQCVQL	HLA-A02:03	MHC Binding	Positive-Intermediate	purified MHC/competitive/radioactivity	half maximal inhibitory concentration (IC50)	0.6
KLWAQCVQL	HLA-A02:03	MHC Binding	Positive-Intermediate	purified MHC/competitive/radioactivity	dissociation constant KD (~IC50)	0.6
KLWAQCVQL	HLA-A03:01	MHC Binding	Negative	purified MHC/direct/fluorescence	qualitative binding	0.9
KLWAQCVQL	HLA-A03:01	MHC Binding	Positive-Low	purified MHC/direct/fluorescence	dissociation constant KD (~EC50)	0.9
KLWAQCVQL	HLA-A11:01	MHC Binding	Negative	purified MHC/direct/fluorescence	qualitative binding	13
KLWAQCVQL	HLA-A24:02	MHC Binding	Negative	purified MHC/direct/fluorescence	qualitative binding	5.5
KLWAQCVQL	HLA-A26:01	MHC Binding	Negative	purified MHC/direct/fluorescence	qualitative binding	25
KLWAQCVQL	HLA-A31:01	MHC Binding	Positive-Intermediate	purified MHC/direct/fluorescence	dissociation constant KD (~EC50)	6.5
KLWAQCVQL	HLA-A68:02	MHC Binding	Negative	cellular MHC/competitive/fluorescence	half maximal inhibitory concentration (IC50)	12
KLWAQCVQL	HLA-A68:02	MHC Binding	Negative	purified MHC/competitive/radioactivity	dissociation constant KD (~IC50)	12
KLWAQCVQL	HLA-B07:02	MHC Binding	Negative	purified MHC/direct/fluorescence	qualitative binding	7.5
KLWAQCVQL	HLA-B08:01	MHC Binding	Negative	purified MHC/direct/fluorescence	qualitative binding	7.5
KLWAQCVQL	HLA-B15:01	MHC Binding	Negative	purified MHC/direct/fluorescence	qualitative binding	1.6
KLWAQCVQL	HLA-B27:05	MHC Binding	Negative	purified MHC/direct/fluorescence	qualitative binding	7.5
KLWAQCVQL	HLA-B40:01	MHC Binding	Negative	purified MHC/direct/fluorescence	qualitative binding	6
KLWAQCVQL	HLA-B58:01	MHC Binding	Negative	purified MHC/direct/fluorescence	qualitative binding	4.5
KMKELSPRW	HLA-A01:01	MHC Binding	Negative	purified MHC/direct/fluorescence	qualitative binding	24
KMKELSPRW	HLA-A02:01	MHC Binding	Negative	purified MHC/direct/fluorescence	qualitative binding	4.5
KMKELSPRW	HLA-A03:01	MHC Binding	Negative	purified MHC/direct/fluorescence	qualitative binding	9
KMKELSPRW	HLA-A03:01	MHC Binding	Negative	purified MHC/direct/fluorescence	dissociation constant KD (~EC50)	9
KMKELSPRW	HLA-A11:01	MHC Binding	Negative	purified MHC/direct/fluorescence	dissociation constant KD (~EC50)	26
KMKELSPRW	HLA-A24:02	MHC Binding	Positive	purified MHC/direct/fluorescence	qualitative binding	1.6
KMKELSPRW	HLA-A26:01	MHC Binding	Negative	purified MHC/direct/fluorescence	qualitative binding	20
KMKELSPRW	HLA-A31:01	MHC Binding	Negative	purified MHC/direct/fluorescence	qualitative binding	7
KMKELSPRW	HLA-B07:02	MHC Binding	Negative	purified MHC/direct/fluorescence	qualitative binding	22
KMKELSPRW	HLA-B08:01	MHC Binding	Negative	purified MHC/direct/fluorescence	qualitative binding	44
KMKELSPRW	HLA-B15:01	MHC Binding	Negative	purified MHC/direct/fluorescence	qualitative binding	5.5
KMKELSPRW	HLA-B15:01	MHC Binding	Positive-Low	purified MHC/direct/fluorescence	dissociation constant KD (~EC50)	5.5
KMKELSPRW	HLA-B27:05	MHC Binding	Negative	purified MHC/direct/fluorescence	dissociation constant KD (~EC50)	17
KMKELSPRW	HLA-B40:01	MHC Binding	Negative	purified MHC/direct/fluorescence	qualitative binding	8
KMKELSPRW	HLA-B58:01	MHC Binding	Positive-Intermediate	purified MHC/direct/fluorescence	dissociation constant KD (~EC50)	0.09
KMKELSPRW	HLA-B58:01	MHC Binding	Positive	purified MHC/direct/fluorescence	qualitative binding	0.09
KMQRMLLEK	HLA-A03:01	MHC Binding	Positive-High	purified MHC/competitive/radioactivity	dissociation constant KD (~IC50)	0.6
KMQRMLLEK	HLA-A03:01	MHC Binding	Positive-Intermediate	purified MHC/direct/fluorescence	dissociation constant KD (~EC50)	0.6
KMQRMLLEK	HLA-A03:01	MHC Binding	Positive-Intermediate	purified MHC/direct/radioactivity	half life	0.6
KMQRMLLEK	HLA-A11:01	MHC Binding	Positive-Intermediate	purified MHC/direct/fluorescence	dissociation constant KD (~EC50)	1.4
KMQRMLLEK	HLA-A11:01	MHC Binding	Positive-High	purified MHC/direct/radioactivity	half life	1.4
KMQRMLLEK	HLA-A11:01	MHC Binding	Positive-High	purified MHC/competitive/radioactivity	dissociation constant KD (~IC50)	1.4
KMQRMLLEK	HLA-A31:01	MHC Binding	Positive-High	purified MHC/competitive/radioactivity	dissociation constant KD (~IC50)	4
KMQRMLLEK	HLA-A68:01	MHC Binding	Positive-Low	purified MHC/competitive/radioactivity	dissociation constant KD (~IC50)	17
KPASRELSV	HLA-B07:02	MHC Binding	Positive-High	purified MHC/direct/radioactivity	half life	0.3
KPASRELSV	HLA-B07:02	MHC Binding	Positive-High	purified MHC/competitive/radioactivity	dissociation constant KD (~IC50)	0.3
KPASRELSV	HLA-B35:01	MHC Binding	Negative	purified MHC/competitive/radioactivity	dissociation constant KD (~IC50)	8.5
KPASRELSV	HLA-B35:01	MHC Binding	Negative	purified MHC/direct/radioactivity	half life	8.5
KPASRELSV	HLA-B51:01	MHC Binding	Positive-Low	purified MHC/competitive/radioactivity	dissociation constant KD (~IC50)	1.2
KPASRELSV	HLA-B53:01	MHC Binding	Negative	purified MHC/competitive/radioactivity	dissociation constant KD (~IC50)	4.5
KPASRELSV	HLA-B54:01	MHC Binding	Negative	purified MHC/competitive/radioactivity	dissociation constant KD (~IC50)	1.6
KPLLAPHHVV	HLA-B07:02	MHC Binding	Positive-Intermediate	purified MHC/competitive/radioactivity	dissociation constant KD (~IC50)	1.4
KPLLAPHHVV	HLA-B35:01	MHC Binding	Negative	purified MHC/competitive/radioactivity	dissociation constant KD (~IC50)	5
KPLLAPHHVV	HLA-B51:01	MHC Binding	Negative	purified MHC/competitive/radioactivity	dissociation constant KD (~IC50)	1.3
KPLLAPHHVV	HLA-B53:01	MHC Binding	Negative	purified MHC/competitive/radioactivity	dissociation constant KD (~IC50)	38
KPLLAPHHVV	HLA-B54:01	MHC Binding	Negative	purified MHC/competitive/radioactivity	dissociation constant KD (~IC50)	0.25
KPTTFMLKY	HLA-B07:02	MHC Binding	Negative	purified MHC/competitive/radioactivity	dissociation constant KD (~IC50)	4.5
KPTTFMLKY	HLA-B35:01	MHC Binding	Positive-High	purified MHC/competitive/radioactivity	dissociation constant KD (~IC50)	0.3
KPTTFMLKY	HLA-B51:01	MHC Binding	Negative	purified MHC/competitive/radioactivity	dissociation constant KD (~IC50)	6
KPTTFMLKY	HLA-B53:01	MHC Binding	Positive-High	purified MHC/competitive/radioactivity	dissociation constant KD (~IC50)	0.2
KPTTFMLKY	HLA-B54:01	MHC Binding	Negative	purified MHC/competitive/radioactivity	dissociation constant KD (~IC50)	9.5
KQFDTYNLW	HLA-A01:01	MHC Binding	Negative	purified MHC/direct/fluorescence	qualitative binding	19
KQFDTYNLW	HLA-A02:01	MHC Binding	Negative	purified MHC/direct/fluorescence	qualitative binding	7
KQFDTYNLW	HLA-A02:01	MHC Binding	Negative	purified MHC/direct/fluorescence	dissociation constant KD (~EC50)	7
KQFDTYNLW	HLA-A03:01	MHC Binding	Negative	purified MHC/direct/fluorescence	qualitative binding	1.8
KQFDTYNLW	HLA-A11:01	MHC Binding	Negative	purified MHC/direct/fluorescence	qualitative binding	2.5
KQFDTYNLW	HLA-A24:02	MHC Binding	Positive-Intermediate	purified MHC/direct/radioactivity	half life	0.8
KQFDTYNLW	HLA-A24:02	MHC Binding	Positive	purified MHC/direct/fluorescence	qualitative binding	0.8
KQFDTYNLW	HLA-A26:01	MHC Binding	Negative	purified MHC/direct/fluorescence	qualitative binding	14
KQFDTYNLW	HLA-A31:01	MHC Binding	Positive-Low	purified MHC/direct/fluorescence	dissociation constant KD (~EC50)	1
KQFDTYNLW	HLA-B07:02	MHC Binding	Negative	purified MHC/direct/fluorescence	qualitative binding	37
[truncated: 2,524 more rows]
